# Supplementary material for: Improving Risk Assessment for Metastatic Disease in Endometrioid Endometrial Cancer Patients Using Molecular and Clinical Features: An NRG Oncology/Gynecologic Oncology Group Study
Source: MDPI journal article supplement (doi:10.3390/cancers14174070), 2022-08-23
Supplement: s1 [file s1]

## Supplement S1 to S15

### Table of Contents

| Section | Title                                                                                                                                                    | Pages |
|---------|----------------------------------------------------------------------------------------------------------------------------------------------------------|-------|
| S1      | Transcript Selection in Training-1                                                                                                                       | 2-30  |
| S2      | Limit Transcript Selection with Random Re-Sampling in Training-1                                                                                         | 31-36 |
| S3      | Evaluate Candidate Transcripts in Training-2                                                                                                             | 37    |
| S4      | Require Consistency in Candidate Transcripts in Training Cohorts                                                                                         | 38    |
| S5      | Nodal and Distant Metastasis Prediction with Clinical Factors and/or Molecular Features in Training-1                                                    | 39-41 |
| S6      | Odds of Nodal and Distant Metastasis based on the MS7 Classifier, Grade 3 and/or Myometrial Invasion                                                     | 42    |
| S7      | Raw Data for Evaluating Risk of Metastasis in Validation-1 and Validation-2                                                                              | 43-51 |
| S8      | MS7 Classifier Correlations with Cancer Biomarker Expression                                                                                             | 52    |
| S9      | MS7 Classifier Relationship with Mutations in Cancer Biomarkers                                                                                          | 53    |
| S10     | Evaluations for the MS7 Classifier, Molecular Subtypes and Other Molecular Features                                                                      | 54-57 |
| S11     | Differential Gene Expression in Training-1 Patients with Extreme MS7 Scores                                                                              | 58-62 |
| S12     | Enriched Pathways in Training-1 Patients with Extreme MS7 Scores                                                                                         | 63-64 |
| S13     | Pathway Analyses of Differentially Expressed Transcripts in Endometrioid Endometrial Cancer Patients Classified with High versus Low Risk of Metastasis. | 65-67 |
| S14     | Stage Distribution of RNA Sequencing-Based MS7 Score                                                                                                     | 68    |
| S15     | Additional Characteristics of the Cohorts and Exploratory Evaluations of the Potential Prognostic Relevance of the MS7 Classifier                        | 69-71 |

## Supplement S1 to S15

### S1. Transcript-Selection in Training-1.

**Table S1** provides a summary of the 1,630 transcripts (Gene Symbol |ID) that distinguished nodal (stage IIIC) or distant (stage IV) endometrioid endometrial cancer (EEC) from stage I EEC. The relationship with metastasis was assessed using univariate logistic regression modeling with individual transcripts included as the explanatory variable. Statistical significance was set at  $p < 0.05$ . These loose criteria did not include correction for false-discovery. The coefficient, standard error and p-value for the individual transcripts in the univariate logistic regression model in the 75 cases in Training-1 were calculated using R and ranked in ascending order by p-value. The seven transcripts in the final MS7 classifier are bolded and highlighted in blue.

| <b>Table S1.</b>       |                                                   |                       |                    |
|------------------------|---------------------------------------------------|-----------------------|--------------------|
|                        | <b>Univariate Logistic Modeling in Training-1</b> |                       |                    |
| <b>GeneSymbol   ID</b> | <b>Coefficient</b>                                | <b>Standard Error</b> | <b>P-value</b>     |
| FAM170A 340069         | -0.982421987                                      | 0.256926531           | 0.000131439        |
| PCDHGA1 56114          | 0.793237589                                       | 0.216812449           | 0.000253562        |
| SNP3 26168             | 1.968204311                                       | 0.592258005           | 0.000889843        |
| MAP2K1 5604            | 1.940295914                                       | 0.590608098           | 0.001018915        |
| PTPLAD1 51495          | 1.271930639                                       | 0.390485902           | 0.001124766        |
| WDR64 128025           | -1.102892563                                      | 0.339107498           | 0.001144594        |
| C6orf164 63914         | -0.902868075                                      | 0.277984441           | 0.001162566        |
| NLRP9 338321           | -0.781259641                                      | 0.240830584           | 0.001178548        |
| CDRT4 284040           | -1.278540999                                      | 0.397193576           | 0.001286669        |
| FGFR2 2263             | -0.588564779                                      | 0.182869881           | 0.001288677        |
| LUC7L 55692            | -1.285625942                                      | 0.399464169           | 0.001289186        |
| C14orf93 60686         | -2.264781954                                      | 0.706795149           | 0.001353925        |
| TXLNG 55787            | 1.398319103                                       | 0.437768485           | 0.0014022          |
| ETF1 2107              | 2.189811489                                       | 0.688662405           | 0.001473747        |
| CCDC130 81576          | -1.349244648                                      | 0.425217714           | 0.001508373        |
| ITIH3 3699             | -0.861787013                                      | 0.271958704           | 0.001530614        |
| FAM116B 414918         | -0.890097745                                      | 0.281286077           | 0.001554105        |
| TMEM22 80723           | 0.847209592                                       | 0.26776304            | 0.001556022        |
| C12orf60 144608        | -1.280096713                                      | 0.407682634           | 0.001689857        |
| CDC16 8881             | -2.38335072                                       | 0.762983958           | 0.001785783        |
| ZNF688 146542          | -1.171927148                                      | 0.37664338            | 0.001861373        |
| HSCB 150274            | -1.44194983                                       | 0.464713846           | 0.001916494        |
| <b>RSRC1 51319</b>     | <b>1.076378266</b>                                | <b>0.349321336</b>    | <b>0.002060703</b> |
| CROCC 9696             | -1.175205311                                      | 0.381538368           | 0.002068783        |
| ZNF528 84436           | -0.864922982                                      | 0.282358167           | 0.002189747        |
| C22orf43 51233         | -0.66377434                                       | 0.216946365           | 0.002216149        |
| EIF2S2 8894            | 2.4444906                                         | 0.799169617           | 0.002222342        |
| ZFP36L2 678            | -1.085996313                                      | 0.355403649           | 0.002245582        |
| KIAA0196 9897          | 1.378963942                                       | 0.452171369           | 0.00229109         |
| WFDC8 90199            | -0.518410872                                      | 0.170159736           | 0.002314354        |
| PCDHAC2 56134          | 0.435401841                                       | 0.143140361           | 0.002351818        |
| IFT27 11020            | -1.038539502                                      | 0.342170687           | 0.002404158        |
| MED14 9282             | 1.58992677                                        | 0.526277277           | 0.002518732        |

## Supplement S1 to S15

|                           |              |             |             |
|---------------------------|--------------|-------------|-------------|
| TTC21A 199223             | -0.61150961  | 0.202621488 | 0.002544574 |
| TRIM50 135892             | -0.727374357 | 0.241131334 | 0.002557053 |
| PCDHGA3 56112             | 0.50133265   | 0.166319307 | 0.002575915 |
| RGP1 9827                 | 0.92836827   | 0.30818057  | 0.002591766 |
| KRTAP5-10 387273          | -0.575230285 | 0.191016959 | 0.002600379 |
| TRPM4 54795               | -0.801324535 | 0.266443867 | 0.002634237 |
| CUBN 8029                 | -0.670190963 | 0.223496504 | 0.00271166  |
| C12orf27 283460           | -0.497602388 | 0.16631263  | 0.002771836 |
| C6orf70 55780             | -1.343978471 | 0.449406227 | 0.00278462  |
| LOC143188 143188          | -1.051539976 | 0.353047656 | 0.002896964 |
| H2AFB1 474382             | -0.690404065 | 0.231818363 | 0.00289936  |
| STX19 415117              | -0.491387137 | 0.165221824 | 0.00293844  |
| LRP5L 91355               | -0.883576558 | 0.297096135 | 0.002939043 |
| LTB4R2 56413              | -1.194213211 | 0.40236277  | 0.002997431 |
| FAM53A 152877             | -0.783599818 | 0.264278174 | 0.00302627  |
| ETS2 2114                 | -1.013874261 | 0.341943037 | 0.003026451 |
| DDX24 57062               | 2.045308488  | 0.690166494 | 0.003041619 |
| LRRC27 80313              | -1.075726979 | 0.363701493 | 0.003099241 |
| COL28A1 340267            | -0.494862157 | 0.168241873 | 0.003267605 |
| CPT1B 1375                | -0.742175709 | 0.252806702 | 0.00332749  |
| LOC728743 728743          | -0.855069603 | 0.291736702 | 0.003379126 |
| CYP2E1 1571               | -0.463931683 | 0.158319084 | 0.003385711 |
| EPR1 8475                 | 0.371561531  | 0.126969347 | 0.003429233 |
| GLTSCR2 29997             | -1.189119883 | 0.406577155 | 0.003447784 |
| CALB1 793                 | 0.326243716  | 0.112325309 | 0.00367894  |
| ACAD11 84129              | -1.093019317 | 0.376551714 | 0.003699525 |
| C2orf81 388963            | -0.797873789 | 0.274949647 | 0.003709181 |
| YWHAB 7529                | 1.982233869  | 0.683123017 | 0.003711164 |
| QRICH1 54870              | 2.071723288  | 0.714366268 | 0.003730608 |
| SPINLW1 57119             | -0.349450322 | 0.120671767 | 0.003781033 |
| PSMD8 5714                | 2.015838567  | 0.696658302 | 0.003808737 |
| NAA50 80218               | 1.353336806  | 0.468130756 | 0.003840944 |
| C1orf228 339541           | -0.636870844 | 0.220441134 | 0.003863776 |
| WASH3P 374666             | -1.093429572 | 0.378579412 | 0.003873997 |
| TNIP2 79155               | -1.653868558 | 0.572660759 | 0.003876476 |
| OR2A9P 441295             | -0.855813307 | 0.297000837 | 0.003957644 |
| PAFAH1B1 5048             | 2.153832642  | 0.747795199 | 0.003973675 |
| GSK3B 2932                | 1.637249367  | 0.568730007 | 0.003992149 |
| CCDC88A 55704             | 0.611716339  | 0.212493479 | 0.003992503 |
| CCDC57 284001             | -1.034090182 | 0.359828509 | 0.004055121 |
| UROS 7390                 | -1.508525093 | 0.525746173 | 0.004113774 |
| GFM1 85476                | 1.371378736  | 0.478236649 | 0.004136327 |
| SKINTL 391037             | -0.60081653  | 0.20972749  | 0.004173405 |
| C19orf18 147685           | -0.502137642 | 0.175393039 | 0.004197459 |
| LRRC42 115353             | 1.199760176  | 0.419801654 | 0.004264259 |
| C2CD2 25966               | -1.403602701 | 0.491791836 | 0.004316457 |
| MRPL49 740                | 1.652329193  | 0.579212612 | 0.004334732 |
| MRPL13 28998              | 1.514230569  | 0.531496211 | 0.004385743 |
| C1orf101 257044           | -0.684851334 | 0.241637366 | 0.004593896 |
| TFRC 7037                 | 0.698434467  | 0.246530417 | 0.004610531 |
| DLST 1743                 | 1.64423539   | 0.580976275 | 0.004652984 |
| RCE1 9986                 | 1.975754163  | 0.700622986 | 0.004802422 |
| LIMS3-LOC440895 100271835 | -0.376410775 | 0.133662541 | 0.004860635 |
| PSMA7 5688                | 1.589054407  | 0.564992719 | 0.004915467 |
| TUBB1 81027               | 1.063101405  | 0.378246052 | 0.004944798 |
| C1orf152 767846           | -0.664736112 | 0.236810482 | 0.004999928 |
| PRKDC 5591                | 0.789129557  | 0.281167047 | 0.005006399 |
| XPO5 57510                | 1.509810148  | 0.538056348 | 0.005015374 |
| SF3B2 10992               | 2.255184461  | 0.804148917 | 0.005040464 |

## Supplement S1 to S15

|                    |                    |                    |                    |
|--------------------|--------------------|--------------------|--------------------|
| TMED6 146456       | -0.373200503       | 0.133132484        | 0.005059413        |
| IMPA2 3613         | 1.004867027        | 0.358946236        | 0.005118312        |
| PCOLCE2 26577      | 0.325941037        | 0.116478265        | 0.00513725         |
| HCG2P7 80867       | -0.546707137       | 0.195383884        | 0.005140135        |
| ATP5B 506          | 1.199247511        | 0.429046266        | 0.005187607        |
| TBC1D3C 414060     | -0.671268073       | 0.240233863        | 0.005202386        |
| ARFGEF1 10565      | 1.350108207        | 0.483408831        | 0.005223928        |
| F2R 2149           | 0.891570816        | 0.319935012        | 0.005324368        |
| LDLRAD2 401944     | -0.543043223       | 0.195003613        | 0.005356315        |
| C4orf44 345222     | -0.769100355       | 0.27626619         | 0.005370785        |
| SMURF1 57154       | 1.711172299        | 0.616907003        | 0.005540693        |
| PRPS1 5631         | 1.32913695         | 0.480010338        | 0.005623283        |
| CCDC94 55702       | -1.266959761       | 0.458019722        | 0.005671921        |
| FAM193A 8603       | -1.889907301       | 0.683323078        | 0.00567904         |
| RP1L1 94137        | -0.439834736       | 0.159194702        | 0.005729506        |
| SUGT1L1 283507     | -0.672547644       | 0.24348655         | 0.005742117        |
| IL20 50604         | -0.577127616       | 0.20895709         | 0.005745847        |
| GIYD2 79008        | -0.906487428       | 0.328394804        | 0.005773794        |
| <b>MLLT10 8028</b> | <b>1.2737948</b>   | <b>0.461897122</b> | <b>0.005820146</b> |
| C19orf25 148223    | -1.211931885       | 0.439583974        | 0.005833481        |
| KLK2 3817          | -0.450047779       | 0.163398515        | 0.005881865        |
| <b>TBRG1 84897</b> | <b>-1.38213156</b> | <b>0.501816448</b> | <b>0.005882552</b> |
| C17orf108 201229   | -0.943897422       | 0.342907574        | 0.00591188         |
| NUP155 9631        | 0.818638966        | 0.297434868        | 0.005917282        |
| CHKB-CPT1B 386593  | -0.744554132       | 0.270525062        | 0.00591863         |
| PRMT5 10419        | 1.180618543        | 0.430303084        | 0.006075276        |
| CYP2D6 1565        | -0.488950833       | 0.178259277        | 0.006089563        |
| FES 2242           | -0.879643778       | 0.320947085        | 0.006129445        |
| RAB5C 5878         | 1.216422478        | 0.443874523        | 0.006135236        |
| SPPL2B 56928       | -1.158302888       | 0.422926669        | 0.006166772        |
| HNF1A 6927         | -0.404351868       | 0.147721094        | 0.006195225        |
| TEKT3 64518        | -0.42149351        | 0.15406976         | 0.006224177        |
| CIRBP 1153         | -1.275656478       | 0.466311345        | 0.006226051        |
| YME1L1 10730       | 1.375341617        | 0.502769264        | 0.006227945        |
| CYP2C8 1558        | -0.446859379       | 0.163404987        | 0.006244207        |
| CYP21A2 1589       | -0.412778069       | 0.151236034        | 0.006345677        |
| WASH2P 375260      | -1.104644476       | 0.40495244         | 0.006375099        |
| OCM 654231         | -0.688673201       | 0.252560081        | 0.006395764        |
| SLC25A4 291        | 1.358966833        | 0.498410387        | 0.006399014        |
| DPM1 8813          | 1.199471452        | 0.440540272        | 0.006474529        |
| PCYOX1 51449       | 1.466206142        | 0.53852996         | 0.00647688         |
| PCDHGA2 56113      | 0.445815248        | 0.163749084        | 0.006478002        |
| MMGT1 93380        | 1.017305873        | 0.373730391        | 0.006488197        |
| CDK4 1019          | 1.55621756         | 0.571730346        | 0.006489929        |
| DDX27 55661        | 1.755938746        | 0.645322493        | 0.006507981        |
| DDX21 9188         | 0.712793704        | 0.26199741         | 0.006516089        |
| CCDC101 112869     | -1.193000393       | 0.438539734        | 0.006520438        |
| PNP 4860           | 1.295430276        | 0.476329552        | 0.006535909        |
| HEXDC 284004       | -0.971106772       | 0.357153785        | 0.006547649        |
| ZNF446 55663       | -1.310860288       | 0.48219978         | 0.006557858        |
| FLJ39609 100130417 | -0.41560041        | 0.152893504        | 0.006563129        |
| UBQLNL 143630      | -0.441962158       | 0.162619416        | 0.006572352        |
| MST4 51765         | 0.531688942        | 0.19597959         | 0.006668089        |
| DACT2 168002       | -0.392080717       | 0.144605732        | 0.006700431        |
| VILL 50853         | -0.661010986       | 0.244007751        | 0.006749135        |
| RNF135 84282       | -1.511730926       | 0.558068518        | 0.00675143         |
| C3orf26 84319      | 1.160118573        | 0.428275949        | 0.006752481        |
| DHX36 170506       | 1.195369139        | 0.441474094        | 0.006775598        |
| DNAJA3 9093        | 1.709957132        | 0.631548163        | 0.006777898        |

## Supplement S1 to S15

|                      |                     |                    |                    |
|----------------------|---------------------|--------------------|--------------------|
| CCDC33 80125         | -0.340673028        | 0.125910941        | 0.006816745        |
| GLOD4 51031          | 1.73535212          | 0.641397968        | 0.006818567        |
| HSD11B1L 374875      | -0.941252777        | 0.347975558        | 0.00683169         |
| IDUA 3425            | -0.640921253        | 0.237032954        | 0.006852408        |
| MZF1 7593            | -0.895177496        | 0.331070173        | 0.006853287        |
| CROCCL1 84809        | -1.199894171        | 0.444132904        | 0.006899518        |
| PCMT1 5110           | 1.58927589          | 0.588632714        | 0.006935096        |
| SNRNP35 11066        | -1.141811442        | 0.423091209        | 0.006960338        |
| WDYHV1 55093         | 1.358411448         | 0.503382896        | 0.006963914        |
| WASH5P 375690        | -1.156970229        | 0.428988814        | 0.006997344        |
| MRPL37 51253         | 1.595857579         | 0.592369533        | 0.007059514        |
| SGCE 8910            | 0.512972756         | 0.190457365        | 0.007073305        |
| FAM111A 63901        | -1.268304351        | 0.47091091         | 0.007074858        |
| ZNF10 7556           | -0.933163492        | 0.346590043        | 0.007093707        |
| ZNF140 7699          | -1.285322946        | 0.478118635        | 0.007181836        |
| AQP2 359             | -0.468213453        | 0.174167806        | 0.007181914        |
| WDR61 80349          | 1.659518798         | 0.617360423        | 0.007186258        |
| COL18A1 80781        | -0.845828665        | 0.314924093        | 0.007235258        |
| GOLGA8F 100132565    | -0.695660331        | 0.259022464        | 0.007237495        |
| VAT1 10493           | 0.905489612         | 0.337237484        | 0.007252532        |
| EIF4A3 9775          | 1.381909959         | 0.515413853        | 0.007336617        |
| GPR113 165082        | -0.860755513        | 0.321375618        | 0.007398646        |
| NOXA1 10811          | -0.583665004        | 0.218048707        | 0.00743369         |
| GART 2618            | 1.223982334         | 0.45748492         | 0.007462691        |
| KIAA1161 57462       | 0.610194196         | 0.2280758          | 0.007463994        |
| FOXD1 2297           | 0.424181585         | 0.158566178        | 0.007470528        |
| PSMD1 5707           | 1.615555163         | 0.603940413        | 0.007472388        |
| ASB9 140462          | 0.723320219         | 0.270491997        | 0.007493211        |
| NDUFS1 4719          | 1.190948482         | 0.445404375        | 0.007498398        |
| ELMOD3 84173         | -1.505897613        | 0.563274572        | 0.007507101        |
| ERAP2 64167          | -0.343767644        | 0.128694517        | 0.007558261        |
| PDE9A 5152           | -0.822888864        | 0.308209652        | 0.00758739         |
| TTC9C 283237         | 1.907349611         | 0.714578958        | 0.00760336         |
| TMX2 51075           | 1.605359697         | 0.601826912        | 0.007642302        |
| NPDC1 56654          | -0.612443039        | 0.229628947        | 0.007650923        |
| NEUROD2 4761         | -0.616798368        | 0.231343045        | 0.007672238        |
| EIF2B3 8891          | 1.971696179         | 0.740681324        | 0.00776771         |
| NPIPL3 23117         | -0.557573616        | 0.209732175        | 0.007848865        |
| USH2A 7399           | -0.451970209        | 0.170015014        | 0.00785095         |
| FAM193B 54540        | -1.000218622        | 0.376331866        | 0.00786502         |
| C9orf84 158401       | -0.438515485        | 0.16532764         | 0.007992115        |
| <b>BDNFOS 497258</b> | <b>-0.736747975</b> | <b>0.278626399</b> | <b>0.008188074</b> |
| PDZK1P1 728939       | -0.376128955        | 0.14228824         | 0.008207081        |
| MAN2A1 4124          | 0.630856484         | 0.238787921        | 0.008243967        |
| LOC284900 284900     | -1.110088411        | 0.420436307        | 0.00828266         |
| TXNRD2 10587         | -1.042767013        | 0.395292534        | 0.008340572        |
| MRPL33 9553          | 1.06823752          | 0.404984777        | 0.008346481        |
| PRIM1 5557           | 0.699848305         | 0.265415615        | 0.008369178        |
| PTPN18 26469         | -0.993304953        | 0.376999333        | 0.008419535        |
| SLC35E2 728661       | -1.768533935        | 0.671282828        | 0.008424677        |
| LDLR 3949            | 0.715178001         | 0.271486443        | 0.00843098         |
| C8orf79 57604        | -0.387423797        | 0.147080284        | 0.008436128        |
| SLC22A23 63027       | -0.944467766        | 0.358638595        | 0.008451467        |
| MUSTN1 389125        | -0.519885445        | 0.197435946        | 0.008458817        |
| FGF1 2246            | -0.471812174        | 0.17919094         | 0.008463097        |
| IDI1 3422            | 1.051853889         | 0.399646812        | 0.008489419        |
| DERL1 79139          | 1.956794399         | 0.743669779        | 0.008506696        |
| LMF1 64788           | -0.77058638         | 0.292887687        | 0.0085135          |
| MYH3 4621            | -0.544643403        | 0.207121451        | 0.008548923        |

## Supplement S1 to S15

|                        |                     |                    |                    |
|------------------------|---------------------|--------------------|--------------------|
| PYY 5697               | -0.246407162        | 0.093804931        | 0.008619098        |
| THOC4 10189            | 1.102506054         | 0.419800872        | 0.008632896        |
| C22orf27 150291        | -1.11046522         | 0.423022173        | 0.008662971        |
| JMJD7-PLA2G4B 8681     | -0.843401064        | 0.321591944        | 0.008726641        |
| F10 2159               | -0.597374991        | 0.227963037        | 0.008780336        |
| CLSPN 63967            | 0.550164199         | 0.210030906        | 0.008807323        |
| ARRDC4 91947           | -0.791941928        | 0.302403379        | 0.008823286        |
| FERMT2 10979           | 1.098437378         | 0.419650604        | 0.00885753         |
| ZMAT2 153527           | 1.86700656          | 0.713460581        | 0.008874998        |
| PPIL1 51645            | 1.23768419          | 0.472978893        | 0.008876217        |
| AP2B1 163              | 1.662462086         | 0.635367693        | 0.008882714        |
| PPT2 9374              | 1.470047442         | 0.561865164        | 0.008887007        |
| CCDC48 79825           | -0.589868257        | 0.225490801        | 0.008898468        |
| SLC5A9 200010          | -0.479225627        | 0.183317176        | 0.008943971        |
| <b>PDLIM3 27295</b>    | <b>0.383761369</b>  | <b>0.14682369</b>  | <b>0.008955284</b> |
| MTHFSD 64779           | -1.470813932        | 0.562870429        | 0.008973567        |
| <b>ZNF596 169270</b>   | <b>-0.955900968</b> | <b>0.365965521</b> | <b>0.009001495</b> |
| MBTPS2 51360           | 1.182791064         | 0.453001318        | 0.00902752         |
| USP9X 8239             | 1.379474602         | 0.528439854        | 0.009041879        |
| WFDC6 140870           | -0.323278693        | 0.123847595        | 0.009046431        |
| ZSCAN4 201516          | -0.636103185        | 0.243872693        | 0.009098222        |
| LOC390595 390595       | -0.708518609        | 0.271836711        | 0.009149619        |
| UCP3 7352              | -0.774568465        | 0.297299989        | 0.009178231        |
| RABEP2 79874           | -1.158576461        | 0.44471962         | 0.009182492        |
| CUL2 8453              | 1.500654387         | 0.576051012        | 0.009185494        |
| CIRH1A 84916           | 1.633674984         | 0.627506671        | 0.009229384        |
| PDZK1 5174             | -0.321974639        | 0.123706556        | 0.009248503        |
| MGC42105 167359        | -0.454924723        | 0.174802463        | 0.009254479        |
| VPRBP 9730             | 1.18917315          | 0.456996609        | 0.009264166        |
| NANOG 79923            | -0.53132168         | 0.204330231        | 0.009313993        |
| TNFRSF10A 8797         | 0.589626849         | 0.226756407        | 0.009315167        |
| RPS6KA3 6197           | 0.961586603         | 0.369826278        | 0.009319564        |
| C4orf31 79625          | -0.430159807        | 0.165471457        | 0.009333214        |
| STRAP 11171            | 1.211217733         | 0.466084873        | 0.009357578        |
| TNFSF12-TNFSF13 407977 | -0.547377587        | 0.210729394        | 0.009389476        |
| LOC730101 730101       | 0.588586803         | 0.226722031        | 0.00942962         |
| HOXD13 3239            | 0.399495199         | 0.153914777        | 0.009443663        |
| CSNK2A1 1457           | 1.335788329         | 0.514866377        | 0.0094746          |
| GTPBP4 23560           | 1.427071368         | 0.550071072        | 0.009477272        |
| NMRAL1 57407           | -1.060329365        | 0.408727102        | 0.00948049         |
| LOC219347 219347       | -0.652103734        | 0.25142302         | 0.009496265        |
| PLS1 5357              | 0.608026339         | 0.234604254        | 0.009550006        |
| ZNF137 7696            | -0.887284682        | 0.342378493        | 0.009554977        |
| RHBDD3 25807           | -1.104831203        | 0.426532188        | 0.00959022         |
| UBQLN1 29979           | 1.491286737         | 0.576483423        | 0.009685258        |
| INO80E 283899          | -1.34247286         | 0.519015795        | 0.00969353         |
| ZNF582 147948          | -0.545019898        | 0.210858763        | 0.0097446          |
| PLGLB2 5342            | -0.683372974        | 0.264516172        | 0.009780835        |
| RRAGC 64121            | 0.606486722         | 0.234850186        | 0.009810417        |
| TMEM219 124446         | -1.471546239        | 0.570028676        | 0.009836339        |
| ETFA 2108              | 1.216318447         | 0.471170988        | 0.009837771        |
| RPL18 6141             | -0.984095079        | 0.381377647        | 0.009869478        |
| FOLH1 2346             | -0.544826214        | 0.211365981        | 0.009947648        |
| HSF5 124535            | -0.655936713        | 0.254507862        | 0.009958273        |
| ADRBK2 157             | -0.904992815        | 0.351145118        | 0.009958656        |
| DSCR3 10311            | 1.500932073         | 0.582450306        | 0.009968292        |
| CORO1C 23603           | 1.204495932         | 0.467541125        | 0.009988266        |
| <b>APOL4 80832</b>     | <b>-0.465935125</b> | <b>0.181133144</b> | <b>0.010101509</b> |
| MED30 90390            | 1.331936664         | 0.517905113        | 0.010117792        |

## Supplement S1 to S15

|                        |              |             |             |
|------------------------|--------------|-------------|-------------|
| RNF19B 127544          | 0.825633638  | 0.321114386 | 0.010136106 |
| PTPN20B 26095          | -0.387278452 | 0.150656266 | 0.010151968 |
| RPL32P3 132241         | -1.011034971 | 0.393339903 | 0.010158556 |
| PIP4K2C 79837          | 1.339626681  | 0.521559469 | 0.010213904 |
| RPL13 6137             | -0.868883378 | 0.338334491 | 0.010225192 |
| CYTH2 9266             | -1.385225599 | 0.539512703 | 0.010242015 |
| SIGIRR 59307           | -0.931011521 | 0.362755912 | 0.010273187 |
| DVL2 1856              | 1.281872806  | 0.499676098 | 0.01030547  |
| SCD 6319               | 0.69767617   | 0.271983948 | 0.010313498 |
| TAF1C 9013             | -1.291682991 | 0.503862606 | 0.010360422 |
| IFT52 51098            | 1.262046127  | 0.492400412 | 0.010375756 |
| FAM114A1 92689         | 0.8323391    | 0.324961598 | 0.010426745 |
| EBNA1BP2 10969         | 1.408109819  | 0.549894105 | 0.010446371 |
| CALU 813               | 1.137786352  | 0.444342769 | 0.010449006 |
| ANKK1 255239           | -0.406654831 | 0.158897718 | 0.010490616 |
| APOBEC2 10930          | -0.661285326 | 0.25853285  | 0.010532494 |
| TAF2 6873              | 0.958958449  | 0.37510964  | 0.010573864 |
| SH3BP2 6452            | -1.1237278   | 0.439866008 | 0.010627789 |
| LOC100133612 100133612 | -0.557668917 | 0.218328228 | 0.010641116 |
| NCRNA00174 285908      | -0.685108167 | 0.268462304 | 0.010711526 |
| ECT2L 345930           | -0.542946525 | 0.213040959 | 0.010817034 |
| RPL28 6158             | -0.920814466 | 0.361510231 | 0.010861218 |
| MCM4 4173              | 0.629742843  | 0.247279945 | 0.010875317 |
| PLA2G6 8398            | -0.788846422 | 0.309926376 | 0.010919316 |
| SENP2 59343            | 1.074963502  | 0.42235464  | 0.010922518 |
| C20orf134 170487       | -0.510332045 | 0.200585874 | 0.010952606 |
| ZNF541 84215           | -0.342363806 | 0.134640185 | 0.010996641 |
| TMEM114 283953         | -0.404460182 | 0.15913034  | 0.01103176  |
| WISP1 8840             | 0.510489188  | 0.200863544 | 0.011038661 |
| ZBED5 58486            | -1.308915426 | 0.515047401 | 0.011042549 |
| HOXB13 10481           | -0.220928601 | 0.086956887 | 0.011064085 |
| GSTA1 2938             | 0.2456904    | 0.096785189 | 0.011132486 |
| WDR44 54521            | 0.94400139   | 0.371977311 | 0.011155397 |
| DYSFIP1 116729         | -0.525795166 | 0.207491585 | 0.011275091 |
| SLC26A4 5172           | -0.424412527 | 0.167543815 | 0.011304466 |
| CPNE3 8895             | 1.475164405  | 0.582572583 | 0.011336369 |
| VKORC1L1 154807        | 1.397381578  | 0.551882286 | 0.011340483 |
| SFRS2B 10929           | -1.278118474 | 0.50488548  | 0.011357525 |
| EXD1 161829            | -0.655718984 | 0.259061938 | 0.011369627 |
| MTFR1 9650             | 1.169373125  | 0.462046143 | 0.011378394 |
| P2RY11 5032            | -0.707904989 | 0.279861776 | 0.011423142 |
| UBQLN2 29978           | 1.401763241  | 0.554285335 | 0.011440236 |
| KIAA1279 26128         | 1.387802127  | 0.548793447 | 0.011444535 |
| LRRC48 83450           | -0.400503928 | 0.158409968 | 0.01146246  |
| P4HB 5034              | -1.34164885  | 0.530762387 | 0.01147873  |
| UBP1 7342              | 1.510863123  | 0.597727253 | 0.0114819   |
| HOXA13 3209            | 0.394429652  | 0.156072676 | 0.011497016 |
| GMCL1 64395            | 0.79776044   | 0.315751775 | 0.011519128 |
| ADAM22 53616           | 0.422799341  | 0.16735844  | 0.011526764 |
| HDAC3 8841             | 1.395081308  | 0.55230467  | 0.011539344 |
| NCRNA00167 440072      | -0.654368706 | 0.259170191 | 0.011574406 |
| ZFP2 80108             | -0.763003664 | 0.302302591 | 0.011603675 |
| PCP2 126006            | -0.381413519 | 0.151250409 | 0.011677749 |
| NR1H2 7376             | -1.349429636 | 0.535300688 | 0.011706125 |
| TTC16 158248           | -0.464311976 | 0.184228744 | 0.011725436 |
| FLJ42627 645644        | -0.612606333 | 0.243098484 | 0.011735737 |
| NCRNA00204B 286967     | -0.503878404 | 0.200144791 | 0.011816768 |
| C1orf175 374977        | -0.409291651 | 0.162592268 | 0.011826194 |
| LOC387646 387646       | 0.616088093  | 0.244744846 | 0.011826921 |

## Supplement S1 to S15

|                  |              |             |             |
|------------------|--------------|-------------|-------------|
| ATP6V1H 51606    | 1.611073328  | 0.640787021 | 0.011929927 |
| ZNF862 643641    | -0.766497189 | 0.304916898 | 0.011944138 |
| PPP2R5D 5528     | 1.805303955  | 0.71828562  | 0.011959025 |
| METTL1A 28989    | 1.131998946  | 0.450423965 | 0.011964643 |
| TMEM38B 55151    | 0.496145341  | 0.197479027 | 0.011991475 |
| MAPRE1 22919     | 1.48713065   | 0.592000479 | 0.012003447 |
| CECR1 51816      | -0.44043259  | 0.175338356 | 0.012008278 |
| SRPK1 6732       | 1.073118351  | 0.427399401 | 0.012045478 |
| SLC37A4 2542     | -1.527440837 | 0.608421512 | 0.012056109 |
| LAMA1 284217     | -0.297454631 | 0.118504186 | 0.012070484 |
| GTF2E1 2960      | 1.384776416  | 0.551766638 | 0.0120829   |
| SMCR5 140771     | -0.591659691 | 0.235810846 | 0.012105855 |
| FAM18A 780776    | -0.850212667 | 0.338885805 | 0.01211259  |
| PEG10 23089      | 0.259736424  | 0.103547954 | 0.012129011 |
| ZNF623 9831      | 1.086076092  | 0.433006179 | 0.012134004 |
| HAT1 8520        | 0.896055841  | 0.357319434 | 0.012151412 |
| WBSCR17 64409    | -0.298462864 | 0.11912231  | 0.012227284 |
| OCA2 4948        | -0.24929874  | 0.099542696 | 0.01226453  |
| SLC22A18 5002    | -0.578891058 | 0.231359647 | 0.012344988 |
| MAP2K5 5607      | 1.295651769  | 0.517893166 | 0.01235727  |
| CCT4 10575       | 1.13352001   | 0.453165213 | 0.012372454 |
| CSAD 51380       | -0.721669378 | 0.288548935 | 0.012383289 |
| CCDC159 126075   | -0.66822706  | 0.267248148 | 0.012405342 |
| AMY1A 276        | -0.235026797 | 0.09400097  | 0.012410245 |
| LOC646982 646982 | -0.568560612 | 0.227484779 | 0.012442672 |
| PATZ1 23598      | -1.71897461  | 0.687903756 | 0.012459381 |
| ATP6V1C1 528     | 1.496468052  | 0.599014972 | 0.012482055 |
| C17orf93 360205  | -0.23917772  | 0.095741135 | 0.012483599 |
| LMOD3 56203      | -0.586142097 | 0.23469326  | 0.012507896 |
| AGXT2L2 85007    | -1.081256665 | 0.433110414 | 0.012542851 |
| RFC1 5981        | 1.202375626  | 0.481685836 | 0.012553809 |
| SLC9A11 284525   | -0.549986235 | 0.220439061 | 0.012597198 |
| C3orf32 51066    | -0.448357215 | 0.179838784 | 0.012663091 |
| AMY2B 280        | -0.388575798 | 0.155881297 | 0.012675189 |
| TNPO3 23534      | 1.053749765  | 0.423198301 | 0.012775499 |
| GPN1 11321       | 1.571669093  | 0.631242736 | 0.012781447 |
| WASH7P 653635    | -0.973063656 | 0.391078351 | 0.012840766 |
| LCA5L 150082     | -0.685080211 | 0.275413562 | 0.012865893 |
| KTI12 112970     | 1.617925288  | 0.650600679 | 0.012889143 |
| DFNB59 494513    | -0.586955366 | 0.236259101 | 0.012978035 |
| PRPF8 10594      | 1.17755405   | 0.474056079 | 0.012991677 |
| AES 166          | -1.041595276 | 0.419348787 | 0.012997421 |
| APBB3 10307      | -0.882461953 | 0.355340205 | 0.01301245  |
| C20orf24 55969   | 1.522833734  | 0.613248472 | 0.013019894 |
| MAP6 4135        | -0.390394566 | 0.157232106 | 0.013031076 |
| SP2 6668         | 1.060853496  | 0.427397726 | 0.013060238 |
| LRRC20 55222     | 0.883500511  | 0.355999111 | 0.013073925 |
| GSPT1 2935       | 1.415338621  | 0.5705098   | 0.013107636 |
| DPH2 1802        | 1.554764809  | 0.62673343  | 0.013110872 |
| SPATA20 64847    | -0.837705839 | 0.337795183 | 0.013141098 |
| CACNA1I 8911     | -0.285742133 | 0.115245529 | 0.013159604 |
| C1orf157 284573  | -0.404995255 | 0.163348673 | 0.013162949 |
| AGAP6 414189     | -0.669688315 | 0.270150092 | 0.013177013 |
| DDX46 9879       | 1.134387419  | 0.45771137  | 0.013197669 |
| CDK2 1017        | 0.916780127  | 0.370064632 | 0.013236152 |
| LOC729799 729799 | 0.462493508  | 0.186697916 | 0.013240688 |
| KCNQ1 3784       | -0.477285213 | 0.192855064 | 0.013329629 |
| SNORA25 684959   | -0.45432193  | 0.183594523 | 0.013338767 |
| ARFGAP2 84364    | -1.934026745 | 0.781577864 | 0.013341693 |



# Supplement S1 to S15

|                        |              |             |             |
|------------------------|--------------|-------------|-------------|
| FOXD4L3 286380         | -0.487907765 | 0.197178032 | 0.013344039 |
| GTF3C4 9329            | 0.738563747  | 0.298545049 | 0.013365568 |
| STX18 53407            | -0.476671377 | 0.192776166 | 0.013410882 |
| AFG3L2 10939           | 0.906694606  | 0.366749942 | 0.013426859 |
| ANKRD49 54851          | -0.975418488 | 0.394937203 | 0.013518614 |
| C6orf153 88745         | 1.756545578  | 0.711324267 | 0.013533908 |
| ZFP64 55734            | 1.055229317  | 0.427372944 | 0.01354509  |
| ZNF415 55786           | -1.041123487 | 0.421725187 | 0.01355954  |
| C8G 733                | -0.485171462 | 0.196530165 | 0.013560978 |
| SNRNP40 9410           | 0.962262735  | 0.38993832  | 0.01359726  |
| FAM195B 348262         | -1.083841153 | 0.439285102 | 0.013614229 |
| GRM6 2916              | -0.45346196  | 0.183810848 | 0.013624912 |
| CLUL1 27098            | -0.374023437 | 0.151682115 | 0.013669336 |
| CSDE1 7812             | 1.813552108  | 0.735515749 | 0.013675052 |
| NCRNA00110 642976      | -0.450944375 | 0.182896021 | 0.013679245 |
| RPA1 6117              | 1.07383519   | 0.435572382 | 0.013688226 |
| LHB 3972               | -0.443395581 | 0.179972346 | 0.013751603 |
| RCBTB2 1102            | -0.978385381 | 0.397213384 | 0.01377327  |
| FAM83C 128876          | -0.389429071 | 0.158247054 | 0.013859168 |
| XRN2 22803             | 1.026548125  | 0.417349238 | 0.013905858 |
| PARG 8505              | 0.985039767  | 0.400591651 | 0.013933925 |
| JMJD6 23210            | 1.493685673  | 0.607463067 | 0.013936679 |
| CSNK2A1P 283106        | 0.652992255  | 0.26579138  | 0.014018659 |
| PTPLB 201562           | 0.422797506  | 0.172114776 | 0.014030334 |
| PLB1 151056            | -0.472187129 | 0.192247888 | 0.014043965 |
| TMEM220 388335         | -0.594796783 | 0.24217745  | 0.014047869 |
| FBXW4 6468             | -1.016333757 | 0.413850055 | 0.014057062 |
| AMY2A 279              | -0.330590402 | 0.134619106 | 0.014059228 |
| STAC3 246329           | -0.652330308 | 0.265917971 | 0.014162069 |
| LOC100288778 100288778 | -0.831368748 | 0.338954423 | 0.014177082 |
| ZNF32 7580             | -1.072619108 | 0.4373616   | 0.014187659 |
| PARD3 56288            | 1.103623686  | 0.450258229 | 0.014242412 |
| SCAPER 49855           | 0.940632294  | 0.383827702 | 0.014259344 |
| MAPK14 1432            | 1.632016584  | 0.665949873 | 0.014259465 |
| ALDH16A1 126133        | -1.372866259 | 0.560318374 | 0.014279516 |
| STAR 6770              | -0.474090355 | 0.193526915 | 0.014295996 |
| HSPA14 51182           | 1.103791578  | 0.450913228 | 0.014369057 |
| GPRC5B 51704           | 0.493059633  | 0.201451443 | 0.014383681 |
| CASK 8573              | 1.18365413   | 0.483626262 | 0.014386858 |
| ZSWIM7 125150          | -1.268949521 | 0.51850547  | 0.014392244 |
| CYP2D7P1 1564          | -0.591770836 | 0.241924775 | 0.014441319 |
| MUT 4594               | 1.060779379  | 0.433903724 | 0.014495883 |
| GANAB 23193            | 1.310525834  | 0.536245129 | 0.014529726 |
| TBC1D3B 414059         | -0.675282108 | 0.276480524 | 0.014589083 |
| COPS4 51138            | 1.183153748  | 0.484612097 | 0.014628619 |
| NUP93 9688             | 1.384179785  | 0.567321815 | 0.014693386 |
| LDLRAP1 26119          | -1.231415278 | 0.504812042 | 0.014713547 |
| RALBP1 10928           | 1.37277465   | 0.562780659 | 0.014716919 |
| ZNF193 7746            | -0.998952301 | 0.409535025 | 0.01471838  |
| RASL10B 91608          | 0.512595133  | 0.21021346  | 0.014750376 |
| CHADL 150356           | -0.464592742 | 0.19053176  | 0.014752419 |
| ACCS 84680             | -0.621644236 | 0.254954467 | 0.014758322 |
| FXR2 9513              | 1.401090357  | 0.574747577 | 0.01477903  |
| NADSYN1 55191          | -1.007102406 | 0.413180069 | 0.014791592 |
| C3orf62 375341         | -1.056633477 | 0.433558996 | 0.014804938 |
| TTC23 64927            | -1.265000444 | 0.519123764 | 0.0148179   |
| LRRC56 115399          | -0.629994801 | 0.258681277 | 0.014874951 |
| TRA2A 29896            | -1.191713435 | 0.489378679 | 0.01488537  |
| ATHL1 80162            | -0.376501976 | 0.154719135 | 0.014955515 |

## Supplement S1 to S15

|                        |              |             |             |
|------------------------|--------------|-------------|-------------|
| C6orf97 80129          | -0.332024119 | 0.136460824 | 0.014969776 |
| ZNF787 126208          | -1.059290796 | 0.435400802 | 0.01497804  |
| CBARA1 10367           | 1.962282849  | 0.806579319 | 0.014980692 |
| SFXN1 94081            | 1.383621975  | 0.568751842 | 0.014985303 |
| ITGB3 3690             | 0.396015004  | 0.162823442 | 0.01500848  |
| LINGO4 339398          | -0.336334045 | 0.138341424 | 0.015049393 |
| EGFL8 80864            | -0.507651705 | 0.20882921  | 0.015059624 |
| CHRNA10 57053          | -0.65683733  | 0.270254536 | 0.015080519 |
| MPHOSPH8 54737         | 1.178861133  | 0.485228917 | 0.015119882 |
| C6orf217 100131814     | -0.475495945 | 0.195754309 | 0.01513867  |
| SCN11A 11280           | -0.455839937 | 0.187733004 | 0.015176947 |
| LOC100130872 100130872 | -0.533678142 | 0.219801514 | 0.015182331 |
| KLKB1 3818             | -0.304715942 | 0.125520388 | 0.015198212 |
| BAZ2A 11176            | 1.350208834  | 0.556638496 | 0.0152811   |
| FAM83D 81610           | 0.553178531  | 0.228061687 | 0.015284563 |
| C1orf159 54991         | -1.007305147 | 0.415448114 | 0.015324282 |
| GJC1 10052             | 0.57600882   | 0.237576715 | 0.015328759 |
| SLC39A2 29986          | -0.306885106 | 0.126607881 | 0.015354745 |
| MCM2 4171              | 0.659306939  | 0.272002996 | 0.015355007 |
| FAM108B1 51104         | 0.986791058  | 0.407171774 | 0.015370686 |
| BMF 90427              | -0.755347371 | 0.311722358 | 0.015386934 |
| USP17 391627           | -0.431088933 | 0.177920496 | 0.015395887 |
| LTB4R 1241             | -0.52022041  | 0.214715836 | 0.015400045 |
| PTGDS 5730             | -0.344090436 | 0.14203124  | 0.015408225 |
| SEC16B 89866           | -0.424392389 | 0.175188145 | 0.015414342 |
| ZBTB48 3104            | -1.164050231 | 0.480588231 | 0.015429559 |
| ANAPC4 29945           | -0.553860826 | 0.228774228 | 0.015478171 |
| EFTUD1 79631           | 1.135034759  | 0.468874429 | 0.01548789  |
| HOXD1 3231             | 0.332784832  | 0.1375877   | 0.015575626 |
| YRDC 79693             | 1.479765745  | 0.611846747 | 0.015583638 |
| TMEM65 157378          | 0.803014515  | 0.332131475 | 0.015616332 |
| ATP6V1A 523            | 1.242402571  | 0.513964172 | 0.015636377 |
| ESYT2 57488            | 1.359937851  | 0.56264773  | 0.01564762  |
| SNX30 401548           | 0.81267782   | 0.33624411  | 0.015652111 |
| SIRT6 51548            | -1.322745805 | 0.547670745 | 0.015725671 |
| NUP205 23165           | 0.981091264  | 0.406240922 | 0.015733143 |
| LPAL2 80350            | -0.443965053 | 0.183856949 | 0.01574684  |
| SERINC2 347735         | -0.488133395 | 0.202151944 | 0.015748796 |
| KLHL17 339451          | -0.769782033 | 0.319197506 | 0.015881969 |
| AGPAT9 84803           | 0.456555445  | 0.189409728 | 0.015934523 |
| ORM1 5004              | -0.188751936 | 0.078333147 | 0.015969803 |
| HSF4 3299              | -0.463680867 | 0.192490387 | 0.016002783 |
| CPNE7 27132            | -0.339645137 | 0.141083672 | 0.016066466 |
| CISD1 55847            | 1.36037268   | 0.56526829  | 0.01610195  |
| C20orf177 63939        | 0.671800743  | 0.279303652 | 0.016160513 |
| PJA1 64219             | 0.781310748  | 0.324920807 | 0.016189334 |
| METTL2A 339175         | 1.428039053  | 0.594167651 | 0.016242174 |
| CLCN2 1181             | 0.812002812  | 0.337928709 | 0.016266435 |
| SOAT2 8435             | -0.44145263  | 0.183767486 | 0.01629525  |
| PILRB 29990            | -0.698516651 | 0.290797094 | 0.016302332 |
| NUP85 79902            | 1.46742051   | 0.611649462 | 0.016434524 |
| CCDC84 338657          | -0.739096325 | 0.308170235 | 0.016469669 |
| RPS9 6203              | -1.047582708 | 0.436913121 | 0.016498772 |
| PTPN1 5770             | 1.289147033  | 0.537676183 | 0.016501651 |
| MPG 4350               | -1.143741785 | 0.477033311 | 0.016502241 |
| PLCH2 9651             | -0.384112244 | 0.160333175 | 0.016588081 |
| EIF5 1983              | 1.400044048  | 0.584470298 | 0.01660194  |
| C10orf68 79741         | -0.453434606 | 0.189388739 | 0.016656642 |
| SRP14 6727             | -1.281948    | 0.535577074 | 0.016684721 |

## Supplement S1 to S15

|                        |              |             |             |
|------------------------|--------------|-------------|-------------|
| DCST2 127579           | -0.392176972 | 0.163891589 | 0.016715577 |
| CDR2L 30850            | 0.877289244  | 0.366654172 | 0.016725431 |
| SLC4A1 6521            | -0.411860725 | 0.172152533 | 0.016737792 |
| IHH 3549               | -0.166854448 | 0.069752725 | 0.016752961 |
| HSN2 378465            | 0.628245415  | 0.262707519 | 0.016783098 |
| LOC90246 90246         | -0.399249168 | 0.166966603 | 0.016793778 |
| SLC25A5 292            | 0.792638571  | 0.331649109 | 0.01684876  |
| CHAC2 494143           | 0.61636098   | 0.258040405 | 0.016911694 |
| JMJD5 79831            | -1.181068779 | 0.494620019 | 0.016948155 |
| FRYL 285527            | -1.092586972 | 0.457748981 | 0.016992533 |
| ABHD3 171586           | 0.822987131  | 0.344862542 | 0.017013273 |
| PTHLH 5744             | 0.452266947  | 0.189528237 | 0.017019908 |
| FAM22A 728118          | -0.674728527 | 0.28276048  | 0.017022595 |
| ABCG5 64240            | -0.491868164 | 0.20622157  | 0.017072432 |
| EIF4EBP3 8637          | -0.651037961 | 0.27297502  | 0.017080391 |
| BCHE 590               | 0.317060189  | 0.132987565 | 0.017119363 |
| HSPA1A 3303            | 0.656387798  | 0.275329293 | 0.017125135 |
| RACGAP1 29127          | 0.675872444  | 0.283535928 | 0.017138279 |
| LOC91316 91316         | -0.667757276 | 0.280185412 | 0.017159639 |
| KIAA1683 80726         | -0.385841411 | 0.162031262 | 0.017252706 |
| RIOK1 83732            | 1.242004865  | 0.521821421 | 0.017306347 |
| PYCARD 29108           | -0.553600798 | 0.232664127 | 0.017340893 |
| TCP1 6950              | 1.410755072  | 0.593064133 | 0.017371154 |
| LRRN4CL 221091         | -0.421087834 | 0.177022153 | 0.017372415 |
| PGAM5 192111           | 0.783706059  | 0.329465047 | 0.017372729 |
| RAPSN 5913             | -0.404378028 | 0.170007132 | 0.017378782 |
| RNF167 26001           | 1.810526506  | 0.761245711 | 0.01738921  |
| TCEB1 6921             | 1.573861182  | 0.661744839 | 0.017390286 |
| LOC100144604 100144604 | -0.264717697 | 0.111303822 | 0.017391052 |
| JPH1 56704             | 0.336651763  | 0.141562127 | 0.01740115  |
| SAMD4B 55095           | 1.054951978  | 0.443734338 | 0.017433256 |
| EIF4G1 1981            | 1.103712085  | 0.464279473 | 0.017441884 |
| EIF1B 10289            | 0.932436342  | 0.392414809 | 0.017494362 |
| CCNL2 81669            | -0.763906115 | 0.321718744 | 0.017574962 |
| FLJ40852 285962        | -0.610544279 | 0.257134872 | 0.017576897 |
| SLC35B2 347734         | 1.161175824  | 0.489067719 | 0.017583978 |
| TINF2 26277            | 1.474039501  | 0.621052949 | 0.017622673 |
| PEX26 55670            | 0.745997279  | 0.314411794 | 0.017659753 |
| PRKG2 5593             | 0.376535877  | 0.15872377  | 0.017679094 |
| C20orf151 140893       | -0.535779486 | 0.225871234 | 0.017689352 |
| AADACL4 343066         | -0.425823018 | 0.179523715 | 0.01769402  |
| C17orf48 56985         | -1.233702953 | 0.520287981 | 0.017730794 |
| STOML2 30968           | 1.440692836  | 0.607601213 | 0.017734474 |
| MAP4 4134              | 1.531412941  | 0.645920488 | 0.017744827 |
| POLR1A 25885           | 0.986433681  | 0.416111769 | 0.017759341 |
| TIAF1 9220             | -0.689495374 | 0.290928538 | 0.017788955 |
| RPP14 11102            | 1.546131234  | 0.65242827  | 0.017797214 |
| PGK1 5230              | 0.643690887  | 0.271814044 | 0.017878271 |
| KDM6A 7403             | 0.839140288  | 0.354461949 | 0.017915326 |
| SRPX 8406              | 0.426631199  | 0.1802675   | 0.017949597 |
| ELP3 55140             | -0.520071456 | 0.219836212 | 0.01799493  |
| GUSBP1 728411          | -1.088383686 | 0.460383866 | 0.018074973 |
| RSAD1 55316            | -1.300278285 | 0.550189919 | 0.018111717 |
| SLC25A34 284723        | -0.510963977 | 0.216228079 | 0.018123818 |
| DHX58 79132            | -0.6060943   | 0.256544473 | 0.018150618 |
| POLM 27434             | -1.384069677 | 0.586364175 | 0.018253923 |
| SNX12 29934            | 0.671483803  | 0.284659869 | 0.018329257 |
| NCRNA00093 100188954   | -0.438603273 | 0.185995484 | 0.018366796 |
| TARBP1 6894            | -0.705160215 | 0.299049242 | 0.018373345 |

## Supplement S1 to S15

|                  |              |             |             |
|------------------|--------------|-------------|-------------|
| SSRP1 6749       | 1.12169093   | 0.475716329 | 0.018378706 |
| IL32 9235        | -0.427665933 | 0.181379117 | 0.018380796 |
| ARMC1 55156      | 0.975077924  | 0.413647097 | 0.018409852 |
| GEMIN8 54960     | -1.040295171 | 0.441328542 | 0.018413829 |
| CTNNB1 1499      | 0.76675746   | 0.325463099 | 0.018478052 |
| GOLGA6L 9440295  | -0.601954736 | 0.255533248 | 0.018488803 |
| DNAJB13 374407   | -0.257237907 | 0.109214664 | 0.018505655 |
| KIAA1429 25962   | 1.690900713  | 0.717901275 | 0.018505825 |
| UBXN1 91544      | -0.718358022 | 0.305053479 | 0.01852972  |
| PLXNB1 5364      | -0.961978866 | 0.408568374 | 0.018547078 |
| WDR67 93594      | 0.728331644  | 0.309462186 | 0.018595605 |
| CDK10 8558       | -1.046575259 | 0.444880375 | 0.018648346 |
| DHX16 8449       | 1.524440103  | 0.648065637 | 0.018658084 |
| UTP18 51096      | 1.010514205  | 0.42967047  | 0.018681041 |
| BLNK 29760       | -0.74006842  | 0.314685856 | 0.018684378 |
| GGTA1 2681       | -0.357622856 | 0.152074162 | 0.018691127 |
| TRAF5 7188       | -0.639711127 | 0.272063019 | 0.018706216 |
| KRTAP5-9 3846    | -0.379876716 | 0.161635103 | 0.018762735 |
| GGT3P 2679       | -0.361566159 | 0.153852487 | 0.01876921  |
| FOXDL1 200350    | -0.507321973 | 0.215901378 | 0.018784222 |
| RAE1 8480        | 1.238886023  | 0.527347255 | 0.018809788 |
| LTB 4050         | -0.384370896 | 0.163630008 | 0.018822669 |
| RAP1GDS1 5910    | 1.416058894  | 0.602975884 | 0.018851715 |
| HOMER2 9455      | -0.490146005 | 0.208731274 | 0.018863605 |
| CD1A 909         | -0.328768854 | 0.140096178 | 0.018938629 |
| UBE2G1 7326      | 1.407658925  | 0.60001759  | 0.018974609 |
| MDM4 4194        | -0.978789    | 0.417241919 | 0.018983496 |
| CNR2 1269        | -0.513036137 | 0.218724826 | 0.018997604 |
| TOPBP1 11073     | 0.875907859  | 0.373452514 | 0.019004993 |
| LARS2 23395      | 0.972277807  | 0.414692705 | 0.019048821 |
| KLK14 43847      | -0.238718756 | 0.101885926 | 0.019129367 |
| APOM 55937       | -0.744229012 | 0.317658804 | 0.019136739 |
| GGTLC2 91227     | -0.311063652 | 0.13280659  | 0.019168869 |
| C2orf63 130162   | -0.64037213  | 0.273431925 | 0.019181737 |
| TNFRSF6B 8771    | -0.403006814 | 0.17208271  | 0.019183968 |
| ORC1L 4998       | 0.634451401  | 0.270917627 | 0.019187864 |
| RASSF7 8045      | -0.748664208 | 0.319709307 | 0.019195989 |
| MED18 54797      | -1.319165049 | 0.563349667 | 0.019198956 |
| ABCB7 22         | 1.149786468  | 0.491226566 | 0.019250518 |
| CAPN3 825        | -0.476493598 | 0.203674181 | 0.019310117 |
| WDHD1 11169      | 0.693903268  | 0.296828839 | 0.019401681 |
| B4GALT1 2683     | -0.462645414 | 0.197933559 | 0.019419573 |
| ZNF692 55657     | -0.661189306 | 0.283056104 | 0.01949672  |
| NXF3 56000       | -0.255418614 | 0.109374753 | 0.019529781 |
| CTPS 1503        | 1.036264483  | 0.443899525 | 0.01957179  |
| ADCY4 196883     | -0.540629087 | 0.231654649 | 0.019607674 |
| TNNT2 7139       | -0.284153332 | 0.121798379 | 0.019649131 |
| POU5F1 5460      | -0.282863943 | 0.121250827 | 0.019654308 |
| IMMT 10989       | 1.098834924  | 0.471091655 | 0.019672882 |
| CXorf56 63932    | 0.75695538   | 0.324530975 | 0.019676527 |
| FAM124A 220108   | -0.550009324 | 0.235822459 | 0.01968478  |
| C15orf48 84419   | -0.406139939 | 0.174139398 | 0.019686538 |
| MORN3 283385     | -0.41664018  | 0.178756918 | 0.01976581  |
| XPO7 23039       | 1.683604811  | 0.722447476 | 0.019784054 |
| KLHL23 151230    | 0.412384167  | 0.17695855  | 0.019785031 |
| ANAPC7 51434     | -1.583034741 | 0.679759119 | 0.019868751 |
| SFRS9 8683       | 1.166316454  | 0.501006088 | 0.01991483  |
| LOC283663 283663 | -0.548858178 | 0.23583837  | 0.019951212 |
| FOLH1B 219595    | -0.38720379  | 0.166381836 | 0.019954629 |

# Supplement S1 to S15

|                        |              |             |             |
|------------------------|--------------|-------------|-------------|
| LOC441869 441869       | -0.292927825 | 0.125912409 | 0.019995021 |
| C3orf10 55845          | 1.803891716  | 0.775499334 | 0.02001303  |
| LEPROT 54741           | 0.481526268  | 0.207019367 | 0.020018752 |
| ITFG1 81533            | 0.810287399  | 0.348425224 | 0.020041479 |
| PLEKHF1 79156          | -0.637818498 | 0.27426465  | 0.020042114 |
| TMEM31 203562          | -0.401669663 | 0.172759917 | 0.020071077 |
| LOC100129534 100129534 | -0.489648148 | 0.210600067 | 0.0200712   |
| RALGAPA2 57186         | 0.555862971  | 0.239105542 | 0.020084803 |
| DUOXA2 405753          | -0.297842997 | 0.128122025 | 0.020088957 |
| FOXD4L6 653404         | -0.481597883 | 0.207204899 | 0.020111609 |
| C16orf13 84326         | -0.708548204 | 0.304941375 | 0.020149331 |
| CCDC36 339834          | -0.4982104   | 0.214418523 | 0.020150065 |
| ARPC2 10109            | 1.312348701  | 0.564897314 | 0.020170382 |
| HTR7P1 93164           | 0.758516007  | 0.326508111 | 0.020172956 |
| PRR22 163154           | -0.536251013 | 0.230844938 | 0.020179566 |
| TMSB10 9168            | -0.913836339 | 0.393463982 | 0.020203808 |
| MMP21 118856           | -0.631558434 | 0.271931671 | 0.020206596 |
| CHIA 27159             | -0.239967272 | 0.103331095 | 0.020216022 |
| ECE2 9718              | 0.980960893  | 0.422411676 | 0.020217519 |
| PRR11 55771            | 0.44835666   | 0.193127422 | 0.020256706 |
| C1QTNF7 114905         | -0.419588762 | 0.180738462 | 0.020258555 |
| RPRD1B 58490           | 1.046161249  | 0.450740788 | 0.020287816 |
| PCDHGA4 56111          | 0.372046923  | 0.160352287 | 0.020330888 |
| MDH2 4191              | 0.853025946  | 0.367660935 | 0.020333143 |
| RNF207 388591          | -0.498365552 | 0.214902262 | 0.020393218 |
| FIZ1 84922             | -1.204365278 | 0.519430283 | 0.020415249 |
| TSPAN10 83882          | -0.445747832 | 0.19232131  | 0.020464293 |
| C1orf204 284677        | -0.454112906 | 0.196047384 | 0.020539571 |
| C9orf142 286257        | -0.621188258 | 0.26830724  | 0.020601309 |
| TNFRSF14 8764          | -0.54148397  | 0.233893171 | 0.020607953 |
| HSP90AB1 3326          | 1.306979732  | 0.564553135 | 0.02060913  |
| KRTCAP2 200185         | -0.756359231 | 0.326803357 | 0.020644861 |
| CYP17A1 1586           | -0.280710461 | 0.12132802  | 0.020686979 |
| MCF2L 23263            | -0.602792602 | 0.260625592 | 0.020729896 |
| MST1P9 11223           | -0.39042807  | 0.168870802 | 0.020778083 |
| TXNRD1 7296            | 0.727547615  | 0.314764964 | 0.020810793 |
| POLA2 23649            | 0.973713314  | 0.42128339  | 0.020816157 |
| CDK9 1025              | -1.485799572 | 0.64308876  | 0.020865391 |
| KCNMB2 10242           | -0.375326256 | 0.162476877 | 0.020886563 |
| RNF215 200312          | -1.07344536  | 0.464706616 | 0.020891362 |
| HIST1H4J 8363          | -0.556117039 | 0.240798505 | 0.020917488 |
| COX19 90639            | -0.907354391 | 0.392908195 | 0.020925317 |
| POU5F1B 5462           | -0.29821363  | 0.12918456  | 0.020975182 |
| ACAD10 80724           | -1.314048398 | 0.56929838  | 0.020988613 |
| DHRS12 79758           | -0.825808039 | 0.357776365 | 0.020989781 |
| PELO 53918             | 1.001753472  | 0.434095934 | 0.021017074 |
| DCTPP1 79077           | 0.924565076  | 0.400665668 | 0.021022926 |
| LIMS3 96626            | -0.237505186 | 0.102963287 | 0.021071674 |
| C22orf46 79640         | -0.884607409 | 0.383555048 | 0.021091779 |
| ST6GALNAC3 256435      | 0.415048124  | 0.179975647 | 0.021103095 |
| PLAC8L1 153770         | -0.46079946  | 0.199833289 | 0.021115136 |
| ZNF578 147660          | -0.565421784 | 0.245322591 | 0.021177257 |
| HCCS 3052              | 1.490580475  | 0.646821706 | 0.021196339 |
| C21orf99 149992        | -0.403656215 | 0.175234654 | 0.021249705 |
| ZNF837 116412          | -0.560930398 | 0.243552113 | 0.021271941 |
| IRAK4 51135            | -1.246496403 | 0.541239687 | 0.021276618 |
| TIMELESS 8914          | 0.772246351  | 0.335336226 | 0.021284377 |
| NDUFAB1 4706           | 1.552712367  | 0.674275936 | 0.021290955 |
| OBSCN 84033            | -0.394414114 | 0.17129972  | 0.021308139 |

# Supplement S1 to S15

|                        |              |             |             |
|------------------------|--------------|-------------|-------------|
| GEMIN5 25929           | 1.01850877   | 0.442486564 | 0.021347321 |
| SLC2A9 56606           | -0.616041995 | 0.267644225 | 0.021350982 |
| PPOX 5498              | -0.811341529 | 0.352543913 | 0.021369518 |
| C21orf2 755            | -0.762966188 | 0.331538404 | 0.021375215 |
| GSTA2 2939             | 0.325938544  | 0.14163761  | 0.021379501 |
| BARD1 580              | 0.447655613  | 0.194677188 | 0.021477898 |
| RNASET2 8635           | -0.505411057 | 0.219794917 | 0.021478462 |
| MUC6 4588              | -0.175193733 | 0.076192648 | 0.021484949 |
| WDR89 112840           | -1.202868023 | 0.52334098  | 0.021536739 |
| SLC16A8 23539          | -0.49351893  | 0.214736615 | 0.021547431 |
| TNNI2 7136             | -0.457110304 | 0.198927154 | 0.021568741 |
| TDRD3 81550            | -1.023238644 | 0.445416901 | 0.021603915 |
| BRF1 2972              | -1.046022362 | 0.455467237 | 0.021642062 |
| LRCH3 84859            | 1.052479972  | 0.458408345 | 0.021679073 |
| APEH 327               | 0.980088168  | 0.426890694 | 0.021682963 |
| MAGEE1 57692           | 0.382869789  | 0.166779424 | 0.021695008 |
| CHCHD3 54927           | 1.114389913  | 0.485438687 | 0.021696775 |
| CD74 972               | -0.412840698 | 0.17993648  | 0.021769307 |
| CA2 760                | 0.374542316  | 0.163267925 | 0.021788495 |
| ELAC1 55520            | -1.097367111 | 0.478360913 | 0.021789637 |
| KLK1 3816              | -0.259170826 | 0.112991177 | 0.02180623  |
| ASB12 142689           | -0.302814824 | 0.132027357 | 0.021814845 |
| GOLT1A 127845          | -0.316956255 | 0.13823156  | 0.021851634 |
| UCKL1AS 100113386      | -0.457215288 | 0.199433868 | 0.021873009 |
| SLC13A5 284111         | -0.231340572 | 0.100922438 | 0.021890585 |
| LOC100272146 100272146 | -0.566626548 | 0.247223189 | 0.021907744 |
| GOLGA9P 283796         | -0.481361981 | 0.210151577 | 0.02198965  |
| SFRP5 6425             | -0.244109192 | 0.106584679 | 0.022004855 |
| DOCK7 85440            | 0.674437439  | 0.294485394 | 0.02200835  |
| DAXX 1616              | 1.829442796  | 0.798923043 | 0.022027918 |
| SUFU 51684             | -1.043641185 | 0.45579265  | 0.02203709  |
| GGTLC1 92086           | -0.352643764 | 0.154078507 | 0.022095172 |
| KCNQ1OT1 10984         | -0.486596872 | 0.212613156 | 0.022099758 |
| EDIL3 10085            | 0.346453018  | 0.151382379 | 0.022102871 |
| C19orf66 55337         | -0.619266653 | 0.270693058 | 0.022154536 |
| GATC 283459            | 0.648350154  | 0.283468007 | 0.022183714 |
| SEPT12 124404          | -0.533212691 | 0.233141232 | 0.022191143 |
| NCRNA00120 55389       | 0.545559317  | 0.23856441  | 0.022204997 |
| MED1 5469              | 0.98460459   | 0.430797128 | 0.022281113 |
| COMMD2 51122           | 1.17180989   | 0.512761708 | 0.022295751 |
| FKBP6 8468             | -0.498235277 | 0.218160102 | 0.022382954 |
| IARS 3376              | 0.861821426  | 0.377431295 | 0.022407627 |
| IGSF10 285313          | 0.373820023  | 0.163734169 | 0.022425003 |
| MAD2L1BP 9587          | 1.77258621   | 0.776502448 | 0.022443182 |
| ELOVL5 60481           | 0.706962418  | 0.309859729 | 0.022515549 |
| TSR1 55720             | 1.318501543  | 0.578161247 | 0.022577557 |
| SLC24A6 80024          | -0.771804228 | 0.338453486 | 0.022584869 |
| PXK 54899              | 0.653515812  | 0.286599069 | 0.02259322  |
| RHOA 387               | 1.610014038  | 0.706199175 | 0.022617775 |
| TEX14 56155            | -0.578375585 | 0.253696864 | 0.022620144 |
| PDCD10 11235           | 0.844809518  | 0.370588199 | 0.022628755 |
| THOC6 79228            | -1.027246189 | 0.450712533 | 0.022657528 |
| LOC650368 650368       | -0.712191142 | 0.312493784 | 0.022663678 |
| LOC100130015 100130015 | -0.728079968 | 0.319512711 | 0.022683722 |
| NRF1 4899              | -1.704190342 | 0.74801309  | 0.022709337 |
| RPS3 6188              | -1.138800476 | 0.499851876 | 0.022710145 |
| ATAD2 29028            | 0.585036751  | 0.256794227 | 0.022712776 |
| PHF11 51131            | -0.905883609 | 0.397705444 | 0.022739973 |
| FKBP5 2289             | 0.42400769   | 0.186190338 | 0.022769461 |

## Supplement S1 to S15

|                        |              |             |             |
|------------------------|--------------|-------------|-------------|
| PLIN5 440503           | -0.294301297 | 0.129235407 | 0.022771316 |
| PIK3R1 5295            | -0.410471185 | 0.180272951 | 0.022789646 |
| MDC1 9656              | 0.968640935  | 0.425486429 | 0.022813139 |
| THBS2 7058             | 0.353657668  | 0.155378994 | 0.022840203 |
| HRASLS5 117245         | -0.301159249 | 0.132354619 | 0.02288215  |
| NSUN2 54888            | 1.47869987   | 0.649871565 | 0.022883595 |
| NUDCD1 84955           | 0.797236214  | 0.350393302 | 0.022890278 |
| PRG4 10216             | -0.491172732 | 0.215935592 | 0.02292837  |
| CDK11A 728642          | -0.987549975 | 0.434245229 | 0.022955421 |
| C1orf126 200197        | -0.455484709 | 0.200299546 | 0.022964924 |
| ITLN1 55600            | -0.322742212 | 0.141926045 | 0.022964976 |
| ZRSR2 8233             | -0.727305493 | 0.319847076 | 0.022971017 |
| USP14 9097             | 1.274913242  | 0.560704274 | 0.022979745 |
| CATSPER4 378807        | -0.59480001  | 0.261597609 | 0.022982759 |
| CHRNA5 1138            | 0.362822504  | 0.159590921 | 0.022998878 |
| IL4I1 259307           | -0.354976928 | 0.156146629 | 0.023004715 |
| GMPS 8833              | 1.027598754  | 0.452146777 | 0.023043628 |
| PCSK1 5122             | 0.264245965  | 0.11630265  | 0.023083216 |
| LOC100130933 100130933 | -0.215291984 | 0.094785469 | 0.023125156 |
| TTC28 23331            | -0.734458525 | 0.323363216 | 0.02312814  |
| ASCL2 430              | -0.343702634 | 0.151346116 | 0.023148737 |
| ZMYND12 84217          | -0.369804031 | 0.162851572 | 0.023158835 |
| AARS 16                | 1.194205677  | 0.525928503 | 0.023167469 |
| PSMD2 5708             | 1.08547554   | 0.478089412 | 0.023180619 |
| GOLGA4 2803            | 0.78965599   | 0.34780123  | 0.023181917 |
| TMEM101 84336          | -0.275987259 | 0.12156051  | 0.023185181 |
| RNF122 79845           | -0.917516487 | 0.40417364  | 0.02320123  |
| DDX23 9416             | 1.505515825  | 0.66332317  | 0.023228425 |
| MLLT6 4302             | -1.27922538  | 0.563629547 | 0.023230903 |
| DKC1 1736              | 1.232612772  | 0.543126464 | 0.023239362 |
| ZNF814 730051          | -0.746749018 | 0.329169309 | 0.023293489 |
| TREH 11181             | -0.289705415 | 0.127732816 | 0.023325681 |
| C12orf47 51275         | -1.41375053  | 0.623428019 | 0.023347223 |
| SFRS8 6433             | -1.453703073 | 0.641104215 | 0.023359769 |
| PIN1L 5301             | 0.826990525  | 0.364780438 | 0.023384654 |
| KLHL3 26249            | -0.485956683 | 0.214369581 | 0.023395685 |
| RPL27A 6157            | -0.858103559 | 0.378538052 | 0.023397038 |
| XRRA1 143570           | -1.166298506 | 0.514643971 | 0.023437673 |
| POLR3D 661             | 0.931051558  | 0.410871582 | 0.023448917 |
| ANKAR 150709           | -0.809512861 | 0.357369084 | 0.023500338 |
| SBNO1 55206            | 0.542538395  | 0.239541946 | 0.023518857 |
| DNAJC22 79962          | -0.378774899 | 0.167305955 | 0.023576241 |
| C1orf229 388759        | -0.554704314 | 0.245023978 | 0.023581639 |
| C3orf72 401089         | -0.395550739 | 0.17476545  | 0.023615758 |
| SFI1 9814              | -1.032711507 | 0.456373186 | 0.023643932 |
| NARFL 64428            | -1.197217544 | 0.529137732 | 0.023661465 |
| SBDS 51119             | 1.189618273  | 0.525831425 | 0.023675371 |
| RAD21 5885             | 0.904683408  | 0.400121502 | 0.023757912 |
| GOLGA2B 55592          | -0.584916866 | 0.258730334 | 0.023776595 |
| CLK4 57396             | -0.907782486 | 0.401613873 | 0.023800376 |
| KCNC4 3749             | -0.563068204 | 0.249219066 | 0.023862842 |
| DHRS7B 25979           | -0.848981921 | 0.375794041 | 0.023872928 |
| NENF 29937             | -0.679137571 | 0.300711717 | 0.023918614 |
| FAM49B 51571           | 0.702160225  | 0.31094614  | 0.023936871 |
| COL6A4P2 646300        | -0.29000947  | 0.128478694 | 0.023992002 |
| IPPK 64768             | 1.197149423  | 0.530533517 | 0.024039271 |
| CDK3 1018              | -0.617671162 | 0.273823873 | 0.024087904 |
| ATP11B 23200           | 0.450162007  | 0.199579812 | 0.024098902 |
| GNA11 2767             | 0.450258094  | 0.199654748 | 0.024121813 |

## Supplement S1 to S15

|                  |              |             |             |
|------------------|--------------|-------------|-------------|
| HUWE1 10075      | 0.943002763  | 0.41826505  | 0.024161094 |
| TMEM86B 255043   | -0.890464015 | 0.395147757 | 0.024227873 |
| SNORA39 677821   | 0.55397326   | 0.245859238 | 0.024245714 |
| FARSA 2193       | 1.42293582   | 0.631679382 | 0.024282898 |
| RNF114 55905     | 1.707467434  | 0.758453337 | 0.024369761 |
| LOC643677 643677 | -0.406509263 | 0.180642728 | 0.024426772 |
| LOH12CR2 503693  | -0.750048657 | 0.333393975 | 0.024465665 |
| DR1 1810         | 1.017980685  | 0.452494169 | 0.024467356 |
| GATS 352954      | -0.682086252 | 0.303244822 | 0.024493903 |
| POSTN 10631      | 0.343138567  | 0.15259746  | 0.024534652 |
| INCENP 3619      | 0.754314668  | 0.335452392 | 0.02453484  |
| TP53AIP1 63970   | -0.281622725 | 0.125241932 | 0.024536067 |
| ZNF497 162968    | -0.727154168 | 0.323397982 | 0.024545545 |
| CXXC1 30827      | -1.105395637 | 0.491662766 | 0.024558332 |
| SPG7 6687        | -1.392203211 | 0.619259248 | 0.024565028 |
| MRFAP1L1 114932  | -1.203130852 | 0.535319483 | 0.024608053 |
| SIL1 64374       | -0.77173618  | 0.343435834 | 0.024633355 |
| ARHGEF3 50650    | -0.774864562 | 0.344829354 | 0.024633911 |
| LOC149134 149134 | -0.351737347 | 0.156589242 | 0.024688506 |
| RC3H2 54542      | 0.616605905  | 0.274540175 | 0.024706651 |
| KLHL31 401265    | -0.468552825 | 0.208839543 | 0.024858018 |
| KIAA1715 80856   | 0.727979502  | 0.324521261 | 0.024881257 |
| FAM71F1 84691    | -0.367924659 | 0.164102919 | 0.024959043 |
| APOB48R 55911    | -0.51343167  | 0.229080131 | 0.025008239 |
| LOC375190 375190 | -0.631992038 | 0.281990839 | 0.025014462 |
| ZNF542 147947    | -0.684513073 | 0.30543924  | 0.025021041 |
| ADCY3 109        | 0.740725301  | 0.33066038  | 0.025081883 |
| CA3 761          | -0.392634359 | 0.175278485 | 0.025087015 |
| PRR5 55615       | -0.720016641 | 0.321488811 | 0.025114821 |
| C20orf11 54994   | 1.614056494  | 0.720823374 | 0.025143917 |
| PCDHGA11 56105   | 0.448209075  | 0.200280345 | 0.025227026 |
| LRP2 4036        | 0.194216252  | 0.086788817 | 0.025233923 |
| RRM1 6240        | 0.706568521  | 0.315779    | 0.02525099  |
| PRKAR2A 5576     | 0.448903571  | 0.20066272  | 0.025279479 |
| CAMK2G 818       | 1.523379376  | 0.680985752 | 0.025284973 |
| DIAPH3 81624     | 0.477401781  | 0.213461032 | 0.025320207 |
| TRIP13 9319      | 0.614937595  | 0.275042742 | 0.025365582 |
| RALGAPB 57148    | 1.390741277  | 0.622091354 | 0.025378633 |
| CRIPAK 285464    | -0.653159916 | 0.292205562 | 0.025399271 |
| RPS6KA1 6195     | -0.94616073  | 0.423326942 | 0.02541347  |
| C16orf80 29105   | 1.353878396  | 0.605775969 | 0.025420697 |
| LGTN 1939        | -1.120760533 | 0.501587227 | 0.025454927 |
| CIRL 51279       | -0.749091277 | 0.335277649 | 0.02546718  |
| MRGPRX3 117195   | -0.491816714 | 0.220152947 | 0.025484559 |
| CIAPIN1 57019    | 1.455150722  | 0.651546783 | 0.02552398  |
| NUDT18 79873     | -0.79200904  | 0.35470688  | 0.025558506 |
| CCDC21 64793     | 0.816479081  | 0.365685866 | 0.025566524 |
| AGPAT3 56894     | -1.369578933 | 0.613521871 | 0.025593628 |
| REEP6 92840      | -0.340119629 | 0.152388919 | 0.025620358 |
| WWTR1 25937      | 0.575901048  | 0.258065    | 0.025640593 |
| DGCR14 8220      | -1.171197853 | 0.524989381 | 0.025687874 |
| LOC643719 643719 | -0.451990546 | 0.202607863 | 0.025690153 |
| KCNRG 283518     | -0.350420035 | 0.157085417 | 0.025696959 |
| RRM2 6241        | 0.567205623  | 0.254312095 | 0.025724049 |
| MPP4 58538       | -0.504717242 | 0.226363725 | 0.025769114 |
| NRIP2 83714      | -0.673747141 | 0.302234285 | 0.025799176 |
| AFG3L1 172       | -0.854062632 | 0.383126099 | 0.02580096  |
| ADAM17 6868      | 0.697685671  | 0.313031179 | 0.025826836 |
| ASB2 51676       | -0.466949192 | 0.209569696 | 0.025871636 |



# Supplement S1 to S15

|                        |              |             |             |
|------------------------|--------------|-------------|-------------|
| RQCD1 9125             | 0.686610923  | 0.308179272 | 0.025883219 |
| LGALS9C 654346         | -0.475944211 | 0.213665636 | 0.025912624 |
| KIF2A 3796             | 0.668433545  | 0.300106666 | 0.025925902 |
| PGBD2 267002           | -1.050119589 | 0.471609366 | 0.025969172 |
| ZNF454 285676          | -0.527656912 | 0.237039192 | 0.026012014 |
| RASL11A 387496         | -0.53646593  | 0.24103021  | 0.026032895 |
| RINL 126432            | -0.487651774 | 0.219119713 | 0.02604743  |
| TRAM2 9697             | 0.897077595  | 0.403288441 | 0.026121079 |
| ORM2 5005              | -0.190154586 | 0.085501844 | 0.026149636 |
| GPR89C 728932          | -0.694038377 | 0.31224913  | 0.026235553 |
| RUVBL1 8607            | 1.009211394  | 0.454049349 | 0.026236644 |
| UBD 10537              | -0.252298061 | 0.113560493 | 0.026303161 |
| AS3MT 57412            | -0.442346824 | 0.19911624  | 0.026313685 |
| GUCY2C 2984            | -0.343167108 | 0.154484593 | 0.026326057 |
| CAGE1 285782           | 0.582947314  | 0.262461822 | 0.026345902 |
| CFP 5199               | -0.487746387 | 0.21967692  | 0.026399114 |
| SNX3 8724              | 1.315094376  | 0.592418703 | 0.026427379 |
| GUSBP3 653188          | -0.714826911 | 0.32211198  | 0.026473965 |
| PPAPDC1B 84513         | -1.128312736 | 0.508554938 | 0.026509565 |
| IL18BP 10068           | -0.617761469 | 0.278488047 | 0.02653648  |
| EVL 51466              | -0.880399553 | 0.396893579 | 0.026539445 |
| LRRC29 26231           | -0.608341145 | 0.274346023 | 0.026594209 |
| VCL 7414               | 0.934054415  | 0.421261158 | 0.026603887 |
| C9orf103 414328        | -0.517866584 | 0.233620808 | 0.026643793 |
| PSD4 23550             | -0.731346172 | 0.329934758 | 0.026647787 |
| DYNLL2 140735          | 0.782000166  | 0.35282071  | 0.026662501 |
| KIF21A 55605           | 0.757398064  | 0.341725261 | 0.026664481 |
| AURKA 6790             | 0.600357792  | 0.270883148 | 0.026671097 |
| ZFYVE28 57732          | -0.584934775 | 0.263985096 | 0.026706085 |
| LRRC69 100130742       | -0.431837781 | 0.19489259  | 0.026707038 |
| TOM1 10043             | -0.791732096 | 0.357405148 | 0.026744763 |
| LOC339047 339047       | -0.620341539 | 0.280122393 | 0.026791827 |
| PFDN5 5204             | -0.98571749  | 0.44515179  | 0.026805387 |
| ARL6IP4 51329          | -0.867970748 | 0.39199974  | 0.02681416  |
| BAX 581                | 0.97972075   | 0.442570964 | 0.026849204 |
| GPCPD1 56261           | -0.484795016 | 0.219201571 | 0.026991532 |
| PPP1R3C 5507           | -0.379839352 | 0.17176801  | 0.027011544 |
| TREML3 340206          | 0.595287568  | 0.269267563 | 0.027052047 |
| CENPO 79172            | 0.748156017  | 0.338467073 | 0.027075693 |
| LOC100129637 100129637 | -0.825561652 | 0.373490485 | 0.027077732 |
| KIAA0090 23065         | 1.086869999  | 0.491840783 | 0.027119013 |
| C14orf101 54916        | -0.870156132 | 0.393872182 | 0.027158313 |
| TNFRSF25 8718          | -0.536074284 | 0.242675109 | 0.027173217 |
| AGAP4 119016           | -0.685587183 | 0.310382531 | 0.027185361 |
| STAU1 6780             | 1.591337289  | 0.720826926 | 0.02726832  |
| HEBP2 23593            | -0.786977568 | 0.356482938 | 0.027271027 |
| YDJC 150223            | -0.928947875 | 0.420869589 | 0.02729934  |
| CPB2 1361              | -0.384269947 | 0.174098174 | 0.027299906 |
| TRPM2 7226             | -0.536660302 | 0.243259974 | 0.027375712 |
| PCDHGA9 56107          | 0.357674729  | 0.162154618 | 0.027400567 |
| PTPN9 5780             | 1.202204631  | 0.545125311 | 0.027427933 |
| PTCD2 79810            | 0.982222339  | 0.445380372 | 0.027429113 |
| AGPAT1 10554           | 1.248658112  | 0.566216294 | 0.027435364 |
| CCDC17 149483          | -0.267793399 | 0.12144399  | 0.027448664 |
| POLR3A 11128           | 0.972131448  | 0.440937588 | 0.027475735 |
| MLEC 9761              | -1.10329862  | 0.500450774 | 0.027481496 |
| RAP1GAP 5909           | -0.441679189 | 0.200456446 | 0.027568868 |
| PSMD3 5709             | 1.227850232  | 0.557323386 | 0.0275863   |
| EDF1 8721              | -0.794808989 | 0.360773838 | 0.027590016 |

## Supplement S1 to S15

|                  |              |             |             |
|------------------|--------------|-------------|-------------|
| ORAI3 93129      | -1.000931784 | 0.45436535  | 0.027600191 |
| WDR3 10885       | 0.926183091  | 0.420710577 | 0.027702537 |
| CHCHD7 79145     | 0.828854986  | 0.376780746 | 0.027818696 |
| MYO15B 80022     | -0.401774184 | 0.182641787 | 0.027821562 |
| ACYP2 98         | -0.720899285 | 0.327747528 | 0.027838359 |
| COLQ 8292        | -0.543248859 | 0.246984897 | 0.027840785 |
| CPT2 1376        | 1.069993524  | 0.48651307  | 0.027855819 |
| PKIG 11142       | -0.827321611 | 0.37620794  | 0.027870297 |
| LOC642826 642826 | -0.637026024 | 0.289689973 | 0.027878469 |
| NECAB3 63941     | 0.79275236   | 0.360579964 | 0.027910078 |
| TTC35 9694       | 1.20262493   | 0.547068142 | 0.027927079 |
| XPOT 11260       | 0.910630039  | 0.414362536 | 0.027972988 |
| POM121L9P 29774  | -0.522769441 | 0.237880058 | 0.027976356 |
| STARD4 134429    | 0.589210869  | 0.268127831 | 0.027984767 |
| CNKSR1 10256     | -0.863554621 | 0.392997888 | 0.02799533  |
| TP53TG1 11257    | -0.770881328 | 0.350985561 | 0.028068085 |
| WDR13 64743      | -0.944654808 | 0.430141815 | 0.028081398 |
| DMRTC1 63947     | -0.391678977 | 0.178404508 | 0.028131012 |
| LOC284837 284837 | -0.449893037 | 0.204935744 | 0.028142925 |
| COLEC11 78989    | -0.317338597 | 0.144562682 | 0.028151934 |
| SPA17 53340      | -0.424155382 | 0.193234832 | 0.028161769 |
| TRHDE 29953      | 0.258723806  | 0.117874172 | 0.028169685 |
| ZNF841 284371    | -0.896109722 | 0.408523641 | 0.028269064 |
| TRAPPC2P1 10597  | -1.256761645 | 0.573051913 | 0.028299987 |
| ENTPD2 954       | -0.340313593 | 0.155198535 | 0.028324465 |
| PPIF 10105       | 0.804468951  | 0.366937959 | 0.028351783 |
| C20orf11 51526   | 1.350851313  | 0.616180158 | 0.028357904 |
| LOC729375 729375 | -0.732747489 | 0.334255984 | 0.028366899 |
| C8orf76 84933    | 1.070651934  | 0.488503393 | 0.028401317 |
| TMEM90A 646658   | -0.387444307 | 0.176821253 | 0.028439951 |
| TMEM55B 90809    | 1.347740089  | 0.615333932 | 0.028505528 |
| C3orf24 115795   | 0.59345023   | 0.271130717 | 0.028611563 |
| SQLE 6713        | 0.57478715   | 0.262673457 | 0.028653626 |
| KPNA6 23633      | 1.194982872  | 0.546106089 | 0.0286559   |
| LOC349196 349196 | -0.295585442 | 0.135129352 | 0.028711448 |
| GRM5 2915        | -0.303707322 | 0.138859232 | 0.028730865 |
| FBXO32 114907    | 0.47319119   | 0.216422556 | 0.028784694 |
| AGAP5 729092     | -0.545629143 | 0.249573905 | 0.02879785  |
| SIRT3 23410      | -1.162860272 | 0.531909916 | 0.02880114  |
| WAC 51322        | 1.346498025  | 0.616015959 | 0.028829012 |
| ATF7IP2 80063    | -0.406705271 | 0.186076856 | 0.028838707 |
| THSD1 55901      | -0.600272743 | 0.274679334 | 0.028862591 |
| UPF2 26019       | 1.002327715  | 0.458799474 | 0.028912689 |
| POC1A 25886      | 0.846843483  | 0.387807857 | 0.028986677 |
| SIM2 6493        | 0.277708205  | 0.127207043 | 0.029026994 |
| C2orf82 389084   | -0.416732344 | 0.190909978 | 0.029045122 |
| MGC16703 113691  | -0.356460399 | 0.163316804 | 0.029062959 |
| ADAMTS6 11174    | -0.308930517 | 0.14160747  | 0.029139244 |
| LOC389634 389634 | -0.376541588 | 0.172606857 | 0.02914657  |
| RNMT 8731        | 1.038370559  | 0.475998184 | 0.029149478 |
| KIAA1908 114796  | -0.699408924 | 0.320754393 | 0.029219502 |
| CELF6 60677      | -0.40979201  | 0.187962205 | 0.029243896 |
| AP4B1 10717      | -0.931443275 | 0.427298696 | 0.029269239 |
| DPY19L2P1 554236 | -0.302619637 | 0.13888658  | 0.029339275 |
| CCDC30 728621    | -0.607005606 | 0.278589772 | 0.029342738 |
| ZNF358 140467    | -0.729990761 | 0.335088219 | 0.029368593 |
| ANKS3 124401     | -0.735795593 | 0.337758977 | 0.029371549 |
| RBMS3 27303      | -0.451957445 | 0.207474257 | 0.029377875 |
| DGAT1 8694       | -1.016266158 | 0.466571677 | 0.029394383 |

## Supplement S1 to S15

|                   |              |             |             |
|-------------------|--------------|-------------|-------------|
| C22orf36 388886   | -0.387598952 | 0.177955009 | 0.029400623 |
| GTF2H3 2967       | 0.606560117  | 0.278488158 | 0.029402586 |
| C20orf43 51507    | 1.955046904  | 0.897754615 | 0.029427825 |
| ARHGEF10L 55160   | -0.623095167 | 0.28617644  | 0.029457356 |
| SART3 9733        | 1.479015966  | 0.679475548 | 0.029502789 |
| MTHFD2 10797      | 0.667233423  | 0.306554363 | 0.029513544 |
| ZHX3 23051        | 0.919395583  | 0.422516261 | 0.029555225 |
| GPR176 11245      | 0.362355593  | 0.166572059 | 0.029602521 |
| CSTF1 1477        | 1.387115245  | 0.63769141  | 0.029614088 |
| ACSL5 51703       | -0.283066621 | 0.13031428  | 0.029841772 |
| CCDC42B 387885    | -0.248304746 | 0.114361247 | 0.029913674 |
| HSPA4L 22824      | 0.349931217  | 0.161170091 | 0.02991666  |
| COL9A1 1297       | -0.177920963 | 0.081946428 | 0.029917092 |
| EFNA4 1945        | -0.741098441 | 0.341344668 | 0.0299225   |
| PLK1 5347         | 0.576999611  | 0.265887123 | 0.02999985  |
| CCNA2 890         | 0.553169018  | 0.255009291 | 0.030066651 |
| PAM 5066          | -0.523154989 | 0.241276464 | 0.030137371 |
| CORO6 84940       | 0.344933582  | 0.159177229 | 0.030236518 |
| GAS5 60674        | -0.541176801 | 0.249776615 | 0.030262072 |
| NUP153 9972       | 0.824668655  | 0.380734747 | 0.03031175  |
| PRDM15 63977      | -1.228887206 | 0.567418254 | 0.030330145 |
| ZGLP1 100125288   | -0.43833833  | 0.202504696 | 0.030419594 |
| SF3B3 23450       | 1.164007077  | 0.537776806 | 0.030427539 |
| TBC1D10C 374403   | -0.395178283 | 0.18258683  | 0.030438977 |
| TMCO7 79613       | 0.818544385  | 0.37824717  | 0.030460797 |
| PPM1D 8493        | 0.857245068  | 0.396155676 | 0.030471288 |
| DCST1 149095      | -0.488099753 | 0.225640552 | 0.030527807 |
| MAP3K1 4214       | -0.621607292 | 0.287372553 | 0.030535704 |
| SLC25A35 399512   | -0.316957124 | 0.14656022  | 0.030568811 |
| ESR1 2099         | -0.366392816 | 0.169436579 | 0.030585922 |
| LOC728989 728989  | -0.471354162 | 0.217977379 | 0.030587401 |
| BCL7C 9274        | -0.803440552 | 0.371556751 | 0.030590211 |
| FAAH 2166         | -0.522964592 | 0.241860309 | 0.03059823  |
| LOC728875 728875  | -0.56639923  | 0.262185093 | 0.030749225 |
| UBAP2 55833       | 1.259909477  | 0.583461093 | 0.030821328 |
| DUSP27 92235      | 0.381932845  | 0.176915698 | 0.030862512 |
| FCRL6 343413      | -0.338871581 | 0.156973704 | 0.030867294 |
| DENND2C 163259    | 0.444635421  | 0.205982121 | 0.030880302 |
| DHX33 56919       | 0.550772268  | 0.255175834 | 0.030896518 |
| GNPTG 84572       | -0.876448525 | 0.406176324 | 0.030943145 |
| POM121L10P 646074 | -0.565678459 | 0.262168631 | 0.030951994 |
| GOLGA6L5 374650   | -0.470793335 | 0.218325307 | 0.031053645 |
| DNAJC4 3338       | -0.772320642 | 0.358193823 | 0.03107173  |
| SEC23B 10483      | 0.730910202  | 0.339055021 | 0.031104957 |
| AMD1 262          | 0.971448406  | 0.450664021 | 0.031115426 |
| GPHN 10243        | 0.859422958  | 0.398696014 | 0.031116122 |
| TMEM217 221468    | -0.7249671   | 0.336598842 | 0.03125574  |
| SOLH 6650         | -0.974763547 | 0.452591121 | 0.031260577 |
| DIP2B 57609       | 1.082046792  | 0.502490505 | 0.031289797 |
| VPS13B 157680     | 0.950215666  | 0.441380458 | 0.031332295 |
| COG8 84342        | 0.956010505  | 0.444087309 | 0.031338057 |
| C14orf182 283551  | -0.521508042 | 0.242302941 | 0.031373922 |
| STIP1 10963       | 1.22501164   | 0.569186222 | 0.031380354 |
| RPL9 6133         | -0.753078518 | 0.349950367 | 0.031400656 |
| CDKL5 6792        | 0.383268028  | 0.178102858 | 0.031401477 |
| KCP 375616        | -0.266525644 | 0.123862001 | 0.031413498 |
| ESYT1 23344       | 0.866519906  | 0.402765855 | 0.031442792 |
| TBX19 9095        | -0.610733759 | 0.283963091 | 0.031495898 |
| CLK1 1195         | -0.730202788 | 0.339563186 | 0.031522166 |

## Supplement S1 to S15

|                  |              |              |             |
|------------------|--------------|--------------|-------------|
| FBXL20 84961     | 1.082163063  | 0.503404328  | 0.031579773 |
| TDRD6 221400     | -0.40189765  | 0.187003332  | 0.031622749 |
| MAPKAPK2 9261    | -1.074499629 | 0.499985674  | 0.031629578 |
| EFNA3 1944       | -0.484326733 | 0.225484531  | 0.031718702 |
| AKIRIN1 79647    | 0.898738243  | 0.418449229  | 0.031730978 |
| C3orf19 51244    | -1.032136917 | 0.480596792  | 0.031744346 |
| C2orf89 129293   | -0.265453713 | 0.123610194  | 0.031752969 |
| SLED1 643036     | 0.521001852  | 0.242628486  | 0.031767536 |
| FOXM1 2305       | 0.516384531  | 0.240484843  | 0.031772242 |
| ZNF600 162966    | -0.815064667 | 0.379615565  | 0.031786981 |
| DLD 1738         | 0.814806097  | 0.379560297  | 0.031816331 |
| IRF7 3665        | -0.482480757 | 0.224794239  | 0.031847321 |
| HMX2 3167        | 0.281618752  | 0.131256652  | 0.031908265 |
| NACA2 342538     | -0.857371708 | 0.399657053  | 0.031931381 |
| PLGLA 285189     | -0.416063695 | 0.193986177  | 0.031967958 |
| LOC283392 283392 | 0.318512898  | 0.148515374  | 0.031981164 |
| FOXC2 2303       | 0.325491331  | 0.151795547  | 0.032010894 |
| GTPBP8 29083     | 1.04001219   | 0.485130827  | 0.032050779 |
| PNO1 56902       | 1.081626855  | 0.504632321  | 0.032081321 |
| WIBG 84305       | -0.984683867 | 0.459449108  | 0.032098346 |
| SLC36A2 153201   | -0.476160815 | 0.222217975  | 0.032132003 |
| OXSR1 9943       | 1.331091165  | 0.621204765  | 0.032132576 |
| FANCE 2178       | 0.751822546  | 0.350959814  | 0.032178209 |
| CEP72 55722      | 0.61811828   | 0.288567771  | 0.032191777 |
| ZNF524 147807    | -0.847325654 | 0.395601194  | 0.032204082 |
| ATXN7L2 127002   | -0.904077485 | 0.422130873  | 0.03221767  |
| APOL2 23780      | -0.60211974  | 0.281238732  | 0.032277589 |
| RAB7A 7879       | 1.734885311  | 0.810728362  | 0.032362083 |
| MYOM2 9172       | -0.505095656 | 0.236050081  | 0.032372409 |
| MRPS23 51649     | 1.193700912  | 0.557945023  | 0.032398453 |
| CABIN1 23523     | -1.282012935 | 0.599263612  | 0.03241026  |
| VPS37B 79720     | -0.94754987  | 0.44303921   | 0.032455965 |
| CD2BP2 10421     | -1.570914242 | 0.734749163  | 0.032514475 |
| C10orf107 219621 | -0.237669237 | 0.1111167949 | 0.032522466 |
| PHF13 148479     | 1.193328069  | 0.558219455  | 0.032537849 |
| SLC39A14 23516   | 0.614902329  | 0.287670437  | 0.032555434 |
| PPP2R2A 5520     | 1.013361144  | 0.474120978  | 0.032569763 |
| KLK4 9622        | -0.220073985 | 0.10308558   | 0.03277189  |
| TRIM74 378108    | -0.516934735 | 0.242161207  | 0.032787816 |
| FURIN 5045       | -0.765871911 | 0.358791671  | 0.032794789 |
| FANK1 92565      | -0.346643883 | 0.16239404   | 0.032794923 |
| STAP2 55620      | -0.536778366 | 0.251473191  | 0.032798999 |
| SYTL1 84958      | -0.497440109 | 0.233063656  | 0.032813898 |
| GHITM 27069      | 0.85568796   | 0.400952059  | 0.032831295 |
| UHRF2 115426     | 1.034466021  | 0.484957923  | 0.032916139 |
| DPY19L2 283417   | -0.253846676 | 0.11900959   | 0.032925264 |
| DFFA 1676        | 1.220812318  | 0.572372538  | 0.032933084 |
| FBXO22 26263     | 1.068272748  | 0.500904632  | 0.032950419 |
| APIG2 8906       | -0.703694374 | 0.329997775  | 0.032972206 |
| AKR7A2 8574      | 0.916914579  | 0.430119321  | 0.033025928 |
| CCDC92 80212     | -0.88301763  | 0.414402459  | 0.033103858 |
| COL22A1 169044   | 0.313653659  | 0.147277246  | 0.033197899 |
| SDHA 6389        | 0.817944152  | 0.384081996  | 0.033203977 |
| E2F5 1875        | 0.623073191  | 0.292619624  | 0.033229949 |
| CD160 11126      | -0.494558058 | 0.232288434  | 0.033248568 |
| GARS 2617        | 1.058310485  | 0.497173851  | 0.033283001 |
| LEKR1 389170     | -0.506132025 | 0.237806601  | 0.033309348 |
| MAGIX 79917      | -0.353136564 | 0.165947216  | 0.033336664 |
| WASL 8976        | 1.168713362  | 0.549227609  | 0.033343574 |

## Supplement S1 to S15

|                        |              |             |             |
|------------------------|--------------|-------------|-------------|
| C20orf202 400831       | 0.517929308  | 0.243400129 | 0.033345998 |
| SPIRE1 56907           | 0.383038291  | 0.180021195 | 0.033358649 |
| RTDR1 27156            | -0.326752293 | 0.153602269 | 0.033398308 |
| KIF13A 63971           | 0.667262795  | 0.313725348 | 0.033428299 |
| PIGC 5279              | -1.046230156 | 0.492011401 | 0.033467074 |
| PFKFB1 5207            | -0.594417048 | 0.279550272 | 0.033475518 |
| COQ4 51117             | -0.898647833 | 0.422696047 | 0.03350404  |
| DPP8 54878             | 0.686623659  | 0.323029743 | 0.033538737 |
| PTGIS 5740             | 0.237218964  | 0.111620057 | 0.033566925 |
| PUS1 80324             | -0.920168874 | 0.433001043 | 0.033578586 |
| CSE1L 1434             | 0.987563293  | 0.464773425 | 0.03360102  |
| C12orf10 60314         | -1.172000421 | 0.551845091 | 0.033688112 |
| GTF2IP1 2970           | -1.034117796 | 0.48694344  | 0.033695923 |
| CDK8 1024              | 0.634316607  | 0.298689165 | 0.033697919 |
| PCDHGA6 56109          | 0.33403839   | 0.157335648 | 0.033745965 |
| FANCF 2188             | -0.988982015 | 0.46611594  | 0.033858644 |
| LMTK2 22853            | 0.454312393  | 0.21415212  | 0.033884196 |
| ANKDD1A 348094         | -0.587762119 | 0.277116815 | 0.033922606 |
| BHLHE22 27319          | -0.389950428 | 0.183883901 | 0.033952626 |
| MMAA 166785            | -1.007858797 | 0.475334545 | 0.033979519 |
| NCRNA00105 80161       | -0.507979486 | 0.239615216 | 0.034007725 |
| PMM2 5373              | -1.019894703 | 0.481086985 | 0.034007747 |
| LYSMD4 145748          | -0.749488574 | 0.353592216 | 0.034036328 |
| C9orf41 138199         | 0.533755272  | 0.251886367 | 0.034087763 |
| ERCC3 2071             | 1.591335735  | 0.751035959 | 0.034102786 |
| C20orf3 57136          | 1.031497707  | 0.486975052 | 0.034160367 |
| SRGAP3 9901            | -0.613425281 | 0.289612308 | 0.034167344 |
| STAG3L4 64940          | 0.962117862  | 0.454273067 | 0.034181126 |
| SPAG9 9043             | 1.035207332  | 0.488793745 | 0.034185087 |
| RASGEF1C 255426        | -0.279469068 | 0.131963092 | 0.03419353  |
| LOC100302640 100302640 | -0.404023537 | 0.190885358 | 0.034295773 |
| FTCD 10841             | -0.286487405 | 0.135359416 | 0.034302807 |
| PCGF3 10336            | -1.247257344 | 0.589463489 | 0.034351647 |
| SLC38A10 124565        | -0.820678757 | 0.387985686 | 0.034410394 |
| PAOX 196743            | -0.730991825 | 0.345725472 | 0.034483614 |
| SULT1A3 6818           | -0.715179442 | 0.338253621 | 0.034487177 |
| ZIC2 7546              | 0.160608934  | 0.075963005 | 0.034489257 |
| NCRNA00219 114915      | -0.699039866 | 0.330662098 | 0.034510052 |
| RPUSD3 285367          | 1.200673902  | 0.567951004 | 0.034511436 |
| UBE4B 10277            | 1.305395898  | 0.61756418  | 0.034533912 |
| PKD1L1 168507          | -0.344272491 | 0.162913529 | 0.034581752 |
| HSPA8 3312             | 0.520449537  | 0.246284542 | 0.034583291 |
| SMS 6611               | 0.656549772  | 0.310712429 | 0.034596798 |
| LOC728855 728855       | -0.664076069 | 0.314314533 | 0.034619981 |
| CREG2 200407           | 0.384522693  | 0.182039629 | 0.034660544 |
| B4GALT5 9334           | 0.753930575  | 0.35692602  | 0.034661748 |
| ZMAT5 55954            | -0.802031387 | 0.379734241 | 0.034679071 |
| MRPL45 84311           | 0.987623276  | 0.467636459 | 0.034691021 |
| TRIM11 81559           | -0.81777145  | 0.387355349 | 0.034758045 |
| THRAP3 9967            | 1.370895049  | 0.649365279 | 0.03476107  |
| OR7E91P 79315          | -0.276801246 | 0.131129214 | 0.034780522 |
| PGM2 55276             | 0.705859578  | 0.334400469 | 0.034787689 |
| EFCAB4A 283229         | -0.365176888 | 0.173007703 | 0.03479337  |
| TECR 9524              | -0.875179072 | 0.414758962 | 0.034850535 |
| GSR 2936               | 0.487443965  | 0.231033587 | 0.034872117 |
| NPTN 27020             | 1.04077732   | 0.493424053 | 0.034919051 |
| FN3KRP 79672           | 1.338104455  | 0.634429991 | 0.03493212  |
| HTRA2 27429            | 1.392468076  | 0.660220795 | 0.034936422 |
| MSX1 4487              | -0.212052856 | 0.100547732 | 0.034946565 |

## Supplement S1 to S15

|                  |              |             |             |
|------------------|--------------|-------------|-------------|
| FDXACB1 91893    | -0.789539071 | 0.374411314 | 0.034966348 |
| SNX4 8723        | 0.945937701  | 0.448600378 | 0.034975475 |
| AKAP3 10566      | -0.438464713 | 0.207958827 | 0.034994608 |
| C21orf125 284836 | -0.345478497 | 0.163912902 | 0.035057331 |
| ECHDC2 55268     | -0.494058198 | 0.234419325 | 0.03506707  |
| PCDHGB2 56103    | 0.314599552  | 0.149275563 | 0.035073506 |
| CCT7 10574       | 1.37054437   | 0.65043308  | 0.035106671 |
| CAPS2 84698      | -0.407783392 | 0.193560339 | 0.035139189 |
| AGAP7 653268     | -0.48455574  | 0.23002961  | 0.035161559 |
| AIG1 51390       | -0.992214889 | 0.471064039 | 0.03517596  |
| NAPIL5 266812    | -0.602717509 | 0.286189686 | 0.035203736 |
| REP15 387849     | -0.527833965 | 0.250666951 | 0.035228837 |
| FAM53B 9679      | -0.810269346 | 0.384795082 | 0.035228987 |
| TTL3 26140       | -0.591397566 | 0.281077703 | 0.035375319 |
| CDC123 8872      | 1.589533179  | 0.755486502 | 0.03537965  |
| TSNAXIP1 55815   | -0.346693824 | 0.164789965 | 0.035391292 |
| NXN 64359        | 0.661053642  | 0.314296364 | 0.035441194 |
| DUSP23 54935     | -0.447995264 | 0.213019833 | 0.035459797 |
| ASAP1 50807      | 0.649847741  | 0.309051604 | 0.035490606 |
| NUCB2 4925       | -0.651707238 | 0.309951985 | 0.035500131 |
| ZHX1 11244       | 0.756077775  | 0.359615807 | 0.035513018 |
| VWA1 64856       | -0.433415387 | 0.20619728  | 0.035558075 |
| RHD 6007         | -0.459276349 | 0.218534828 | 0.035586904 |
| FLJ10661 286042  | -0.493607685 | 0.234877569 | 0.035592441 |
| PTK2 5747        | 1.355903079  | 0.645529965 | 0.03568932  |
| RPN2 6185        | 0.949707499  | 0.452150517 | 0.035691618 |
| ZACN 353174      | -0.376689687 | 0.179341072 | 0.035692837 |
| EMR4P 326342     | -0.383511897 | 0.182631502 | 0.035735709 |
| GINS4 84296      | 0.64215966   | 0.305896818 | 0.035793208 |
| TMCO4 255104     | -0.644504612 | 0.307028697 | 0.035802152 |
| SELO 83642       | -0.82016636  | 0.390790361 | 0.035840053 |
| FZD7 8324        | 0.315356241  | 0.150269747 | 0.035852089 |
| PGA5 5222        | -0.312921327 | 0.149165582 | 0.035921769 |
| USF1 7391        | -1.014256796 | 0.483619634 | 0.0359741   |
| FLJ45340 402483  | -0.759804306 | 0.362303499 | 0.035980416 |
| ZNF205 7755      | -0.774417018 | 0.369293533 | 0.035991543 |
| ILF2 3608        | 1.028277095  | 0.490407239 | 0.036012874 |
| RNF180 285671    | -0.342354629 | 0.163315182 | 0.036057208 |
| UQCRFS1 7386     | 0.836005964  | 0.398861388 | 0.03608386  |
| C17orf46 124783  | -0.590132615 | 0.28157288  | 0.0360961   |
| ITIH4 3700       | -0.377107029 | 0.179937337 | 0.036102719 |
| KPNB1 3837       | 1.107876204  | 0.528663373 | 0.036116137 |
| PPAT 5471        | 0.675408494  | 0.322328774 | 0.036135235 |
| MCM7 4176        | 0.79146048   | 0.377726693 | 0.036142042 |
| C16orf79 283870  | -0.469099899 | 0.223944957 | 0.036196717 |
| TSKS 60385       | -0.34094619  | 0.162798867 | 0.036235166 |
| ARSD 414         | -0.627093102 | 0.299504875 | 0.036280837 |
| FBXL6 26233      | -0.845530356 | 0.403834759 | 0.036281963 |
| COPS5 10987      | 1.691154971  | 0.807804461 | 0.036302741 |
| SLC15A2 6565     | -0.348681074 | 0.166553959 | 0.036304351 |
| MLXIPL 51085     | -0.279541197 | 0.133535488 | 0.036314794 |
| ZNF438 220929    | -1.022559204 | 0.488623983 | 0.036373056 |
| PRRT1 80863      | -0.583063938 | 0.278711898 | 0.03643895  |
| AGPAT2 10555     | -0.544205337 | 0.260186761 | 0.036474757 |
| LIME1 54923      | -0.427180563 | 0.204274757 | 0.036509617 |
| PVR 5817         | 1.155493017  | 0.552553406 | 0.03651122  |
| EFEMP2 30008     | -0.432215126 | 0.206710784 | 0.03653549  |
| LGI2 55203       | 0.355755873  | 0.170144293 | 0.036536413 |
| PHLDB3 653583    | -0.769461942 | 0.368091988 | 0.036581286 |

## Supplement S1 to S15

|                 |              |             |             |
|-----------------|--------------|-------------|-------------|
| GGT1 2678       | -0.284742197 | 0.136235484 | 0.036611183 |
| ODF3B 440836    | -0.291824479 | 0.139627254 | 0.036615536 |
| VWA5A 4013      | -0.399762943 | 0.191280912 | 0.036624452 |
| AQP8 343        | -0.434798069 | 0.20809033  | 0.036665623 |
| SLC5A11 115584  | -0.346471093 | 0.165828625 | 0.036677826 |
| STXBP5L 9515    | 0.319849656  | 0.1531489   | 0.036753828 |
| RPLP0P2 113157  | -0.495097436 | 0.23706138  | 0.036754753 |
| GLYCTK 132158   | -0.360604362 | 0.172683266 | 0.036776055 |
| GOLGA7 51125    | 1.00143391   | 0.479683858 | 0.036825296 |
| POM121L8P 29797 | -0.361671573 | 0.173241524 | 0.036827384 |
| C6orf163 206412 | -0.438618797 | 0.210101893 | 0.036829598 |
| USHBP1 83878    | -0.401309275 | 0.192241894 | 0.036840931 |
| CEACAM21 90273  | -0.223832846 | 0.107230251 | 0.036851639 |
| EIF2C2 27161    | 0.755333336  | 0.362060979 | 0.03696008  |
| NUP210L 91181   | -0.383571149 | 0.183932224 | 0.037033555 |
| RPS15 6209      | -0.786183162 | 0.377053774 | 0.037063031 |
| NCOA6 23054     | 1.324959151  | 0.635454204 | 0.037063996 |
| CDKN3 1033      | 0.558987506  | 0.268096794 | 0.037067374 |
| EYA3 2140       | 0.459412795  | 0.220354143 | 0.037079845 |
| C1orf163 65260  | 0.957281564  | 0.459168712 | 0.037086147 |
| ITFG3 83986     | -1.014347289 | 0.486630737 | 0.037121149 |
| IQSEC2 23096    | -0.867580174 | 0.416321723 | 0.037167661 |
| SLC1A2 6506     | -0.34558686  | 0.165854015 | 0.037189193 |
| CHCHD2 51142    | 1.315607743  | 0.631467539 | 0.037213585 |
| PIK3R4 30849    | 1.00941326   | 0.484563311 | 0.037238456 |
| TAF13 6884      | 0.576651703  | 0.276823777 | 0.037242079 |
| ID2B 84099      | -0.397010775 | 0.190651549 | 0.037306911 |
| MCM8 84515      | 0.63417937   | 0.304562557 | 0.037318445 |
| NACAP1 83955    | -0.913782971 | 0.43885736  | 0.037325417 |
| ABHD2 11057     | 0.518760679  | 0.24917929  | 0.037353689 |
| DENND4A 10260   | 0.83131707   | 0.399338309 | 0.037366559 |
| NPEPPS 9520     | 1.004222875  | 0.482466124 | 0.037393919 |
| RSPH10B2 728194 | -0.247223083 | 0.118808446 | 0.037447231 |
| OSBPL5 114879   | -0.638235208 | 0.306742307 | 0.037462422 |
| SCUBE2 57758    | -0.286574798 | 0.137740567 | 0.037476005 |
| ZNF668 79759    | -1.012777587 | 0.486804317 | 0.037483233 |
| RSPRY1 89970    | 0.535777831  | 0.257689844 | 0.037602855 |
| TMEM37 140738   | -0.343145582 | 0.165057576 | 0.037622429 |
| ATG7 10533      | -1.229971358 | 0.59174242  | 0.03765793  |
| ? 388795        | -0.328874248 | 0.158235656 | 0.037674126 |
| DYRK2 8445      | 0.779496929  | 0.37519986  | 0.037750713 |
| ALPK3 57538     | -0.292012556 | 0.140599538 | 0.037809887 |
| GSG2 83903      | 0.443244665  | 0.213489462 | 0.037876391 |
| KIAA0467 23334  | -0.948154566 | 0.456700972 | 0.037885173 |
| NPEPL1 79716    | -0.848152216 | 0.408831919 | 0.038026001 |
| REXO2 25996     | 0.955024184  | 0.460401291 | 0.038048679 |
| PDP2 57546      | 0.60484895   | 0.291746346 | 0.038153535 |
| KIF12 113220    | -0.208235023 | 0.100478123 | 0.038224294 |
| MTCH1 23787     | 0.998562816  | 0.481835174 | 0.038226683 |
| SF3A2 8175      | -0.893677707 | 0.431283426 | 0.038252804 |
| DCI 1632        | -0.71349391  | 0.344445942 | 0.038319103 |
| TGM1 7051       | -0.39770681  | 0.192048737 | 0.03837151  |
| ROCK1 6093      | 0.778841615  | 0.376153464 | 0.0384016   |
| ZCWPW1 55063    | -0.598032207 | 0.288906813 | 0.038453931 |
| VOPPI 81552     | -1.073288679 | 0.518617517 | 0.038497433 |
| ID4 3400        | -0.474092817 | 0.229107062 | 0.0385173   |
| APOBEC3F 200316 | -0.589789891 | 0.285042661 | 0.038534031 |
| TOP1 7150       | 0.872534654  | 0.421762323 | 0.03856647  |
| CELF1 10658     | 0.986478112  | 0.476843987 | 0.038568152 |

## Supplement S1 to S15

|                  |              |             |             |
|------------------|--------------|-------------|-------------|
| MDH1 4190        | 1.364062763  | 0.659467838 | 0.038599649 |
| THBS1 7057       | 0.422786214  | 0.204468511 | 0.038665171 |
| CASP4 837        | -0.624718655 | 0.302236985 | 0.038735773 |
| DNMBP 23268      | -0.571715865 | 0.276623094 | 0.038755984 |
| TYMS 7298        | 0.488636392  | 0.236448831 | 0.038775356 |
| CPLX1 10815      | -0.421638202 | 0.204052789 | 0.038798347 |
| MTIF3 219402     | -0.960496428 | 0.46486257  | 0.03881013  |
| DNAJC15 29103    | -0.345507913 | 0.167245542 | 0.03884055  |
| RPL10 6134       | -1.00345375  | 0.485825877 | 0.038879529 |
| TGOLN2 10618     | 0.892231478  | 0.432128148 | 0.038947782 |
| MED12L 116931    | 0.296603529  | 0.143667933 | 0.038969622 |
| UFC1 51506       | -0.756503932 | 0.366547555 | 0.039030709 |
| SH3TC1 54436     | -0.561497294 | 0.272217263 | 0.039142975 |
| SPTLC2 9517      | 0.853604916  | 0.413964365 | 0.039205345 |
| PPIL2 23759      | -1.295747558 | 0.628387175 | 0.039205736 |
| SARS 6301        | 1.217140684  | 0.590314796 | 0.039221999 |
| PTPN6 5777       | -0.755494851 | 0.366544308 | 0.0392908   |
| NID2 22795       | 0.430908863  | 0.209108995 | 0.039332602 |
| PKHD1 5314       | -0.206489269 | 0.100213114 | 0.039350624 |
| SLC25A2 89874    | 0.346189854  | 0.168032088 | 0.039373655 |
| ODF2L 57489      | -0.639046774 | 0.31022713  | 0.039405048 |
| B3GNTL1 146712   | -0.671609969 | 0.326093301 | 0.039440257 |
| PLA2G4C 8605     | -0.445300128 | 0.216215556 | 0.039444511 |
| TCEB2 6923       | -0.711816605 | 0.34563011  | 0.039448748 |
| IKBKE 9641       | -0.656965323 | 0.319059182 | 0.039487493 |
| SSR4 6748        | -0.627861972 | 0.304930358 | 0.039490982 |
| EFTUD2 9343      | 1.200776419  | 0.583235777 | 0.03951166  |
| SERINC3 10955    | 0.852330384  | 0.414105957 | 0.039566883 |
| PPP1R1B 84152    | -0.228630607 | 0.111084248 | 0.039573524 |
| PRKCG 5582       | -0.198752064 | 0.096570763 | 0.039580757 |
| EPS8L1 54869     | -0.379803433 | 0.184556212 | 0.039597026 |
| ZDHHC24 254359   | -0.760531473 | 0.369565511 | 0.039599056 |
| TREX1 11277      | -0.651712242 | 0.316705883 | 0.03961089  |
| SLC7A9 11136     | -0.391123822 | 0.190087486 | 0.039628642 |
| RPL34 6164       | -0.708523658 | 0.34437899  | 0.039648233 |
| FAM59A 64762     | 0.513577772  | 0.249630452 | 0.039652355 |
| TRPV6 55503      | -0.221496561 | 0.107664124 | 0.039658129 |
| GGT6 124975      | -0.244674721 | 0.118996228 | 0.039767552 |
| GLRX5 51218      | 1.40412598   | 0.682966379 | 0.039789982 |
| HLA-DRB1 3123    | -0.318353499 | 0.154872221 | 0.039822233 |
| LOC400891 400891 | -0.24038832  | 0.11696612  | 0.039860063 |
| KLHL8 57563      | 0.692961549  | 0.33722177  | 0.039887366 |
| ZNF276 92822     | -0.9025324   | 0.439234213 | 0.039899659 |
| C4BPA 722        | -0.136364206 | 0.066371513 | 0.039921593 |
| CRADD 8738       | 0.787324289  | 0.383225428 | 0.03993044  |
| FUT10 84750      | 0.793796499  | 0.386399505 | 0.039942661 |
| GAL3ST2 64090    | -0.33349628  | 0.162413737 | 0.040036238 |
| C16orf48 84080   | -0.566664969 | 0.275967904 | 0.040036442 |
| ERP27 121506     | -0.254026645 | 0.123719941 | 0.040049374 |
| TIMM8A 1678      | 1.008425582  | 0.49115899  | 0.040057538 |
| LRRC3 81543      | 0.371184382  | 0.180809376 | 0.040081841 |
| UMODL1 89766     | -0.247590595 | 0.120621681 | 0.04010935  |
| KIF23 9493       | 0.546164579  | 0.266090794 | 0.040116271 |
| CCL3 6348        | -0.375048906 | 0.182737255 | 0.040131355 |
| FGFR3 2261       | -0.290695025 | 0.141659957 | 0.04016363  |
| SMARCC1 6599     | 0.967726032  | 0.471610481 | 0.040173511 |
| LSG1 55341       | 1.219234845  | 0.594217582 | 0.04018596  |
| RASSF3 283349    | 0.484530655  | 0.23617205  | 0.04020852  |
| PSMB10 5699      | -0.508929068 | 0.248126108 | 0.040258148 |



# Supplement S1 to S15

|                        |              |             |             |
|------------------------|--------------|-------------|-------------|
| KHSRP 8570             | 1.202550379  | 0.586305178 | 0.040260559 |
| PMS2CL 441194          | -0.885896322 | 0.431973006 | 0.040285056 |
| SYT1 6857              | 0.241988031  | 0.118050557 | 0.040377337 |
| MRPL23 6150            | -0.664985977 | 0.324476074 | 0.040421599 |
| GSTM2 2946             | -0.294076753 | 0.143520364 | 0.040459712 |
| KIAA0146 23514         | 0.865926224  | 0.422649297 | 0.040481133 |
| HDHD3 81932            | -0.67439496  | 0.329229101 | 0.040520206 |
| CEBPZ 10153            | 0.877360893  | 0.428426818 | 0.04057309  |
| DUOX2 50506            | -0.247365062 | 0.120795164 | 0.040579012 |
| CSMD1 64478            | -0.320203774 | 0.156420765 | 0.040651514 |
| CCDC86 79080           | 1.176188592  | 0.57471694  | 0.040702008 |
| C1orf97 84791          | -0.619253429 | 0.302602526 | 0.040714557 |
| PHYH 5264              | 0.657664591  | 0.321372689 | 0.040714731 |
| RG9MTD3 158234         | -0.92257933  | 0.450876503 | 0.040737607 |
| PIK3CA 5290            | 0.705639573  | 0.344901728 | 0.040764748 |
| BCO2 83875             | -0.343219183 | 0.167853931 | 0.040879595 |
| MPZL2 10205            | -0.551028476 | 0.269494191 | 0.040886749 |
| PRKRIP1 79706          | -0.950999106 | 0.465123737 | 0.040892801 |
| C19orf12 83636         | -1.246747354 | 0.609813688 | 0.040906885 |
| OPN3 23596             | -0.537446426 | 0.262932211 | 0.040948668 |
| CHST10 9486            | -0.586695671 | 0.287031454 | 0.040952384 |
| PIGS 94005             | 0.604929606  | 0.295966201 | 0.040961996 |
| ZNF3 7551              | -1.136606824 | 0.556121585 | 0.040972327 |
| P2RY1 5028             | 0.388588916  | 0.190151711 | 0.040995742 |
| HLX 3142               | -0.582043104 | 0.284838119 | 0.041011159 |
| LOC100128288 100128288 | -0.464082382 | 0.227116709 | 0.041016299 |
| LRP8 7804              | 0.505104844  | 0.247201456 | 0.041023507 |
| FBXW11 23291           | 1.039119158  | 0.508563501 | 0.041028322 |
| ALG14 199857           | -1.073623481 | 0.525581348 | 0.041078666 |
| ZNF213 7760            | -0.79580708  | 0.389713383 | 0.041148388 |
| LOC440896 440896       | -0.381478308 | 0.186818589 | 0.04115432  |
| GOLGA8DP 100132979     | -0.365996669 | 0.179256502 | 0.041176499 |
| FUCA1 2517             | -0.673466479 | 0.329860321 | 0.041184109 |
| BECN1 8678             | 1.142823705  | 0.559848809 | 0.041220249 |
| SF3A1 10291            | 0.945438766  | 0.463184367 | 0.041233776 |
| TDGF1 6997             | -0.244636076 | 0.119908477 | 0.041331405 |
| PPP3R1 5534            | 1.001092103  | 0.490811595 | 0.041383526 |
| PHAX 51808             | 1.300596635  | 0.637880145 | 0.04145644  |
| TUBGCP4 27229          | 0.748048093  | 0.36691696  | 0.041476035 |
| WDFY2 115825           | -0.96090908  | 0.471423866 | 0.041518707 |
| KPNA1 3836             | 1.368377031  | 0.671424843 | 0.041547967 |
| HSPA9 3313             | 1.27615601   | 0.626188181 | 0.041552409 |
| SAMD1 90378            | 0.777625634  | 0.38161081  | 0.041575411 |
| MYLPF 29895            | -0.39007728  | 0.191475393 | 0.041628116 |
| FPR1 2357              | 0.327561787  | 0.160792913 | 0.041633453 |
| STT3B 201595           | 0.553327787  | 0.271662098 | 0.041667717 |
| AQP6 363               | -0.254001552 | 0.124714016 | 0.041682916 |
| DLGAP5 9787            | 0.447782959  | 0.219911008 | 0.041730201 |
| DHX9 1660              | 0.956396078  | 0.469754618 | 0.041755555 |
| ADAM9 8754             | 0.616764247  | 0.303068751 | 0.041844453 |
| COMMD1 150684          | -1.08341928  | 0.532585162 | 0.041924898 |
| ? 155060               | -0.553551864 | 0.272183792 | 0.041977521 |
| THAP3 90326            | -0.8038649   | 0.395313427 | 0.042003298 |
| LOC100132287 100132287 | -0.44303371  | 0.217899698 | 0.042032301 |
| PLLP 51090             | -0.414049492 | 0.203710083 | 0.042098721 |
| SRA1 10011             | -1.170881456 | 0.576227493 | 0.042155907 |
| ECM1 1893              | -0.414409593 | 0.203988064 | 0.042200405 |
| TCTA 6988              | 0.905877785  | 0.445946368 | 0.04221845  |
| RECQL 5965             | 0.701435517  | 0.345365161 | 0.042255325 |

## Supplement S1 to S15

|                 |              |             |             |
|-----------------|--------------|-------------|-------------|
| C16orf75 116028 | 0.646346756  | 0.318255149 | 0.042264383 |
| DPP7 29952      | -0.498720874 | 0.245600499 | 0.042293728 |
| LRRC36 55282    | -0.304777549 | 0.150117149 | 0.042329641 |
| SEPT10 151011   | 0.629150828  | 0.309953259 | 0.042374346 |
| TMEM38A 79041   | 0.412717141  | 0.203331604 | 0.042379548 |
| GSC 145258      | -0.234231138 | 0.115423957 | 0.042426594 |
| ADAM10 102      | 0.520687391  | 0.256595423 | 0.042436353 |
| SATB1 6304      | 0.394738688  | 0.194587246 | 0.042499572 |
| ZNF266 10781    | -0.673722412 | 0.332244204 | 0.042581397 |
| NPFF 8620       | -0.378570248 | 0.186741331 | 0.042637463 |
| POLR2D 5433     | 1.117354684  | 0.551262957 | 0.042672678 |
| SLC4A1AP 22950  | 1.150494607  | 0.567831747 | 0.042752607 |
| MRPS7 51081     | 1.467953076  | 0.724518169 | 0.042753575 |
| NR2E3 10002     | -0.30293305  | 0.149535224 | 0.042782135 |
| SERPINA4 5267   | -0.157398741 | 0.077718028 | 0.042841298 |
| MRPL36 64979    | 1.161365722  | 0.573443087 | 0.04284168  |
| ARL16 339231    | -0.917043299 | 0.452958557 | 0.04291222  |
| LHPP 64077      | -0.540606751 | 0.267024984 | 0.042913085 |
| PSMB2 5690      | 1.367613116  | 0.675793344 | 0.042999486 |
| RNF168 165918   | 0.430648689  | 0.212836566 | 0.043034256 |
| SNORD89 692205  | -0.504214245 | 0.249254404 | 0.043084488 |
| SMARCA5 8467    | 0.830591007  | 0.410645498 | 0.043109524 |
| TYK2 7297       | -1.121454892 | 0.554524792 | 0.043138032 |
| PACSIN2 11252   | 0.53774039   | 0.265947788 | 0.043178698 |
| STRADA 92335    | -1.480967731 | 0.732453293 | 0.043183803 |
| KMO 8564        | -0.321523593 | 0.159059825 | 0.043238334 |
| COX4I1 1327     | -0.889455789 | 0.440044868 | 0.043250342 |
| FCRL2 79368     | -0.25511832  | 0.126227866 | 0.043270086 |
| B3GALT6 126792  | -1.040656326 | 0.515030061 | 0.043323888 |
| SSR2 6746       | -0.88052079  | 0.435855075 | 0.043361132 |
| ZNF167 55888    | -0.418824828 | 0.207341012 | 0.043385397 |
| CTNND1 1500     | 1.094082879  | 0.541642284 | 0.043390002 |
| GDF6 392255     | 0.335143278  | 0.16592149  | 0.043394724 |
| ACACA 31        | 0.955428573  | 0.473047295 | 0.043411235 |
| ISM1 140862     | -0.30719307  | 0.152108388 | 0.043428328 |
| NT5E 4907       | -0.285634983 | 0.141469021 | 0.043480585 |
| FPR2 2358       | 0.327112913  | 0.162066364 | 0.043550799 |
| STK36 27148     | -0.842214118 | 0.417300983 | 0.043566127 |
| KCNK6 9424      | -0.380281688 | 0.18846516  | 0.043613926 |
| TH1L 51497      | 1.427074659  | 0.707841264 | 0.043790128 |
| ERCC5 2073      | -1.072258881 | 0.531919255 | 0.043817738 |
| CES8 283848     | -0.2533711   | 0.125691043 | 0.043818318 |
| CWH43 80157     | -0.199975486 | 0.099209235 | 0.043831955 |
| LCAT 3931       | -0.507859069 | 0.252110623 | 0.043964463 |
| OCRL 4952       | 0.850603637  | 0.422295927 | 0.043984767 |
| ACOT7 11332     | 0.583747516  | 0.289831842 | 0.044000048 |
| GALNT12 79695   | -0.373072708 | 0.185243155 | 0.044013505 |
| MACF1 23499     | 0.90180993   | 0.447817223 | 0.044031566 |
| C15orf57 90416  | -0.941469185 | 0.467513501 | 0.044032671 |
| PSME3 10197     | 1.441057429  | 0.715638183 | 0.044044443 |
| GLI4 2738       | -0.580725352 | 0.28849775  | 0.044122148 |
| LENG9 94059     | -0.514709141 | 0.255716507 | 0.044134458 |
| MCM10 55388     | 0.437893112  | 0.217553944 | 0.044135416 |
| C18orf55 29090  | 0.893102824  | 0.443748069 | 0.044153059 |
| SNX2 6643       | 0.85456536   | 0.424892632 | 0.044299044 |
| ABCA2 20        | -0.517129467 | 0.257157329 | 0.044331175 |
| LIPT1 51601     | -0.939840807 | 0.467404504 | 0.044350242 |
| SFT2D3 84826    | -0.959604186 | 0.477394335 | 0.044421973 |
| EMP1 2012       | 0.404745962  | 0.201379155 | 0.044444929 |

## Supplement S1 to S15

|                    |              |             |             |
|--------------------|--------------|-------------|-------------|
| RPS11 6205         | -0.895868376 | 0.445750154 | 0.044452428 |
| DHX35 60625        | 1.2384969    | 0.616331177 | 0.044487676 |
| MPST 4357          | -0.632939661 | 0.314991004 | 0.044495828 |
| GLS 2744           | 0.518741175  | 0.258205376 | 0.044534434 |
| LACTB2 51110       | 0.656368369  | 0.326806095 | 0.044597227 |
| ODC1 4953          | 0.599113224  | 0.298314263 | 0.044608329 |
| SLC1A5 6510        | 0.370609229  | 0.18455335  | 0.044628265 |
| MUC12 10071        | -0.273334136 | 0.136115358 | 0.044631975 |
| PHKG1 5260         | -0.453451751 | 0.225847583 | 0.044666915 |
| PRR14 78994        | -1.268537026 | 0.631881679 | 0.044690634 |
| C1orf12 26148      | 0.672633604  | 0.335343042 | 0.044876786 |
| CSNK1G1 53944      | 0.895346453  | 0.446431621 | 0.044902962 |
| POLN 353497        | -0.420687102 | 0.209833223 | 0.044977574 |
| FITM2 128486       | 0.616058355  | 0.307400275 | 0.045060233 |
| C1orf93 127281     | -0.616440134 | 0.307690911 | 0.045130132 |
| C4BPB 725          | -0.178693858 | 0.089213203 | 0.045177514 |
| CBX1 10951         | 0.757222939  | 0.378066047 | 0.045189598 |
| STAT6 6778         | -0.860990501 | 0.429895151 | 0.045199636 |
| CDH13 1012         | 0.391541017  | 0.195591538 | 0.045303014 |
| ECT2 1894          | 0.441401261  | 0.220508469 | 0.045312391 |
| NPIP 9284          | -0.630854612 | 0.315213581 | 0.045354032 |
| TNNI1 7135         | -0.344963447 | 0.172380033 | 0.045373013 |
| UBXN7 26043        | 0.638148507  | 0.318918726 | 0.045395047 |
| DGCR6L 85359       | -0.855415906 | 0.427531681 | 0.045411295 |
| ASCC1 51008        | 1.061700428  | 0.530866    | 0.045506686 |
| THAP7 80764        | -0.776049804 | 0.388112839 | 0.045549219 |
| CCDC61 729440      | -0.624373053 | 0.312276885 | 0.04556279  |
| UBXN2B 137886      | 0.834518106  | 0.417423135 | 0.045585222 |
| TIGD6 81789        | -1.232051383 | 0.616275628 | 0.045587921 |
| SLC12A3 6559       | -0.234281328 | 0.117191633 | 0.045594271 |
| SKAP1 8631         | -0.295506354 | 0.147822356 | 0.045601427 |
| KRAS 3845          | 0.78367745   | 0.392120043 | 0.045655425 |
| LOC84931 84931     | -0.274962073 | 0.137612147 | 0.045706416 |
| KIAA1009 22832     | -0.63115261  | 0.315878664 | 0.04570738  |
| C9orf130 100128782 | -0.571621626 | 0.28608719  | 0.045709301 |
| MRPL42P5 359821    | -0.439282091 | 0.219874881 | 0.045730429 |
| GAB2 9846          | 0.628146766  | 0.314409327 | 0.045731513 |
| C1QTNF3 114899     | -0.537427122 | 0.269012003 | 0.045740387 |
| LTBR 4055          | -0.762982987 | 0.381934795 | 0.04575151  |
| FAM21A 387680      | 0.241915027  | 0.121101589 | 0.045757811 |
| CNOT7 29883        | 1.013800282  | 0.507620267 | 0.045807508 |
| RPS14 6208         | -0.930482573 | 0.465948798 | 0.045829188 |
| LOC440461 440461   | -0.273678252 | 0.137072113 | 0.045868597 |
| WFIKK1 117166      | -0.354077234 | 0.177345874 | 0.045875726 |
| C1orf63 57035      | -0.556951771 | 0.278967762 | 0.045882397 |
| ATP6V1B2 526       | 1.038602925  | 0.520385929 | 0.045952205 |
| C15orf56 644809    | -0.531238059 | 0.26618671  | 0.045962806 |
| SGK2 10110         | -0.242687786 | 0.121621214 | 0.045994957 |
| FAM13AOS 285512    | -0.461941007 | 0.23151644  | 0.046011933 |
| VHL 7428           | 0.724699748  | 0.363234603 | 0.046028855 |
| RYK 6259           | 1.180644142  | 0.591885086 | 0.046073588 |
| AGAP8 728404       | -0.457343077 | 0.229341302 | 0.046134655 |
| SURF4 6836         | 1.155613367  | 0.57959045  | 0.046169025 |
| OGFR 11054         | -0.895298785 | 0.449044941 | 0.046175624 |
| TRAPPC5 126003     | -0.519151988 | 0.260385988 | 0.046176265 |
| IFT140 9742        | -0.745662949 | 0.374005144 | 0.046182249 |
| RPS6 6194          | -0.787311349 | 0.394903361 | 0.046186921 |
| MRPL3 11222        | 1.142311183  | 0.573028422 | 0.046210728 |
| CYP51A1 1595       | 0.754643073  | 0.378569532 | 0.046216922 |

## Supplement S1 to S15

|                  |              |             |             |
|------------------|--------------|-------------|-------------|
| RAB9A 9367       | 0.887061621  | 0.445031912 | 0.046233645 |
| FLJ11235 54508   | -0.482915704 | 0.24229001  | 0.046247116 |
| MUC2 4583        | -0.193338673 | 0.0970066   | 0.046256346 |
| RRP7B 91695      | -0.687794795 | 0.345240476 | 0.046346984 |
| PROS1 5627       | 0.439758287  | 0.220767285 | 0.0463761   |
| PER1 5187        | 0.659054229  | 0.330867523 | 0.046382293 |
| PAK1IP1 55003    | 0.78473238   | 0.393991812 | 0.046398721 |
| LOC154822 154822 | -0.269351148 | 0.135242295 | 0.046412859 |
| HNF1B 6928       | -0.178489677 | 0.08962741  | 0.046430002 |
| HIGD1A 25994     | 0.759696975  | 0.381500551 | 0.046443616 |
| CAMK1G 57172     | -0.42183296  | 0.211855934 | 0.046466466 |
| MFN1 55669       | 0.724326381  | 0.363855063 | 0.046513846 |
| CD1C 911         | -0.287951681 | 0.14470149  | 0.046594196 |
| SAMD11 148398    | -0.272109495 | 0.13674137  | 0.046595633 |
| SLC46A1 113235   | -0.77448107  | 0.389196204 | 0.04659642  |
| EAF1 85403       | 0.92677961   | 0.465832758 | 0.046644778 |
| RAB4B 53916      | -0.754549371 | 0.379296139 | 0.046663574 |
| U2AF1 7307       | -1.15631079  | 0.581391156 | 0.046715675 |
| SGK494 124923    | -0.60354603  | 0.303508394 | 0.046749289 |
| SIAE 54414       | -0.587873472 | 0.29569625  | 0.046800722 |
| AMAC1L2 83650    | -0.392002463 | 0.197202453 | 0.046831891 |
| SNIP1 79753      | 1.070335113  | 0.53865122  | 0.046915168 |
| ZNF264 9422      | -1.142104158 | 0.574815881 | 0.046933001 |
| USP39 10713      | 1.424177631  | 0.716817017 | 0.046943701 |
| C1orf216 127703  | 0.778500103  | 0.391885874 | 0.046972508 |
| DNHD1 144132     | -0.490908577 | 0.247122627 | 0.046978067 |
| CCT2 10576       | 0.969987681  | 0.488293087 | 0.046979318 |
| ZNF429 353088    | -0.481336096 | 0.242335109 | 0.047006494 |
| RAB2A 5862       | 1.117272358  | 0.562918313 | 0.047168291 |
| NT5C1B 93034     | -0.419785371 | 0.211506173 | 0.047173085 |
| BLOC1S1 2647     | -0.714059462 | 0.359980098 | 0.047299539 |
| TRIM38 10475     | -0.810784325 | 0.408762938 | 0.047310778 |
| AP3M1 26985      | 1.009003228  | 0.50870175  | 0.047313075 |
| FAM160B1 57700   | -0.867541266 | 0.437569141 | 0.047407865 |
| C5orf56 441108   | -0.585925953 | 0.295552131 | 0.047425633 |
| KDM4B 23030      | -0.826370165 | 0.416858311 | 0.047437105 |
| RAC3 5881        | 0.507904312  | 0.25622628  | 0.047451368 |
| NUDT14 256281    | -0.550446599 | 0.277692618 | 0.047455132 |
| AGBL2 79841      | -0.247844771 | 0.125049978 | 0.047483076 |
| SRP54 6729       | 1.007194546  | 0.508227341 | 0.04750392  |
| ACSL4 2182       | -0.374391268 | 0.188951124 | 0.047544352 |
| YIPF6 286451     | 0.714664656  | 0.360692146 | 0.047549777 |
| PCSK4 54760      | -0.379954061 | 0.191763935 | 0.047550524 |
| MBD3 53615       | -0.90667483  | 0.457692202 | 0.047594562 |
| KIAA0922 23240   | 0.788347822  | 0.397965951 | 0.047597678 |
| ZNF554 115196    | -1.045102966 | 0.527654311 | 0.04762959  |
| RABL2B 11158     | -0.830628213 | 0.41947945  | 0.047687753 |
| ALG2 85365       | -1.009702405 | 0.509965713 | 0.047710075 |
| DNAJC17 55192    | -0.736704674 | 0.372145168 | 0.04774665  |
| ZNF444 55311     | -0.839332921 | 0.424046788 | 0.047777699 |
| CHMP5 51510      | 0.980831793  | 0.495536965 | 0.047778725 |
| PIGQ 9091        | -0.83509991  | 0.421913241 | 0.047780364 |
| UBR5 51366       | 1.157971511  | 0.585093564 | 0.047802279 |
| HLTF 6596        | 0.541686372  | 0.27370528  | 0.04780629  |
| ST8SIA5 29906    | -0.303453447 | 0.153364292 | 0.04785602  |
| CHD7 55636       | 0.7066288    | 0.357157457 | 0.04787461  |
| CSRNPI 64651     | -0.701560729 | 0.354601553 | 0.047878191 |
| ABCD1 215        | -0.551449911 | 0.278789797 | 0.047927213 |
| KPNA2 3838       | 0.635216408  | 0.321208799 | 0.047975998 |

## Supplement S1 to S15

|                        |              |             |             |
|------------------------|--------------|-------------|-------------|
| LOC349114 349114       | -0.70028274  | 0.354129037 | 0.04798751  |
| HNRNPR 10236           | 0.791434046  | 0.400231535 | 0.04799186  |
| ANGPTL2 23452          | 0.576705131  | 0.291652588 | 0.047999802 |
| AVPR1A 552             | 0.298231685  | 0.150839112 | 0.048024576 |
| AKAP12 9590            | 0.303379507  | 0.153455932 | 0.048043745 |
| KLF7 8609              | 0.472678103  | 0.239141075 | 0.048090716 |
| MYOC 4653              | -0.241017949 | 0.121943703 | 0.048101684 |
| NUDT21 11051           | 0.777276322  | 0.393305568 | 0.048124687 |
| SUCLA2 8803            | 0.705677177  | 0.357273848 | 0.048248671 |
| MST1P2 11209           | -0.324101413 | 0.164090459 | 0.048252412 |
| C7orf31 136895         | -0.417322968 | 0.211301276 | 0.048266565 |
| P2RX4 5025             | -0.67487705  | 0.341782084 | 0.048315504 |
| SEC23A 10484           | 0.737427081  | 0.373488193 | 0.04833263  |
| DSCC1 79075            | 0.558339998  | 0.282797864 | 0.048342749 |
| PCNA 5111              | 0.673577899  | 0.341225522 | 0.04838217  |
| TDGF3 6998             | -0.253613955 | 0.12848306  | 0.048392014 |
| LGALS9 3965            | -0.423910403 | 0.214841496 | 0.048480646 |
| SLC22A11 55867         | -0.297195246 | 0.150636006 | 0.04850282  |
| EFCAB6 64800           | -0.317253601 | 0.160821882 | 0.048529558 |
| LOC441089 441089       | 0.826486035  | 0.419005984 | 0.048553446 |
| TSPYL3 128854          | 0.324562523  | 0.164546736 | 0.048556655 |
| FLJ39653 202020        | -0.613618302 | 0.311110198 | 0.048569627 |
| NAA35 60560            | 0.841187492  | 0.426494339 | 0.04857197  |
| PCDHGB3 56102          | 0.339415674  | 0.172108964 | 0.048598466 |
| PRPF31 26121           | -1.201176209 | 0.609208978 | 0.048644076 |
| DPY19L2P4 442523       | -0.294648147 | 0.149441719 | 0.048648519 |
| EXOC6 54536            | 0.816026618  | 0.413945209 | 0.048685035 |
| METAP2 10988           | 1.074446602  | 0.545123484 | 0.048722152 |
| POLR2C 5432            | 1.320261941  | 0.669895718 | 0.048741383 |
| FCF1 51077             | 0.898012019  | 0.455909271 | 0.048870869 |
| C12orf45 121053        | -0.699360658 | 0.355094248 | 0.048894883 |
| CYP3A5 1577            | -0.20071805  | 0.101918862 | 0.048908253 |
| WDR27 253769           | -0.60480816  | 0.307139273 | 0.048934052 |
| DCAF12L2 340578        | 0.290774806  | 0.147677641 | 0.048955011 |
| PSENEN 55851           | -0.614032151 | 0.311886696 | 0.048979884 |
| SLC30A6 55676          | 0.621956298  | 0.315913841 | 0.048981471 |
| APOBEC3A 200315        | -0.398241273 | 0.202367981 | 0.049078792 |
| CES3 23491             | -0.179694717 | 0.091332972 | 0.049129259 |
| LOC100133161 100133161 | -0.389547849 | 0.197997007 | 0.049132148 |
| ASRGL1 80150           | -0.309006239 | 0.157062642 | 0.049136237 |
| TEX261 113419          | 1.369983071  | 0.696428376 | 0.04916526  |
| INPP5J 27124           | -0.560729854 | 0.285087699 | 0.049198438 |
| SLC26A8 116369         | -0.400810106 | 0.203887991 | 0.049317697 |
| CXCL3 2921             | -0.226949198 | 0.115457554 | 0.049338998 |
| OTUD6A 139562          | -0.400529064 | 0.203764974 | 0.049339938 |
| C10orf32 119032        | -0.736855797 | 0.374942879 | 0.049385524 |
| SLC19A1 6573           | -0.79295452  | 0.403541574 | 0.049415578 |
| ELAVL1 1994            | 1.715883105  | 0.873235546 | 0.049417517 |
| TTLL1 25809            | -0.732521056 | 0.372844802 | 0.049451183 |
| BCKDHB 594             | 0.68670816   | 0.349581149 | 0.049486723 |
| PPIB 5479              | -0.65566172  | 0.333839003 | 0.049529426 |
| NCRNA00201 284702      | -0.539092267 | 0.274498191 | 0.049539464 |
| SPIN2B 474343          | 0.907117574  | 0.461892545 | 0.049539981 |
| SALL2 6297             | 0.36224548   | 0.184492828 | 0.049591998 |
| RRM2B 50484            | 0.612091308  | 0.311749558 | 0.049598885 |
| GLTSCR1 29998          | -1.156154925 | 0.589073426 | 0.049684889 |
| ABCA7 10347            | -0.428311844 | 0.218334344 | 0.049794561 |
| RAB3GAP1 22930         | 1.116766169  | 0.569297134 | 0.049802337 |
| CDC40 51362            | 0.795915085  | 0.40575292  | 0.049811899 |

### Supplement S1 to S15

|                 |             |             |             |
|-----------------|-------------|-------------|-------------|
| RBBP4 5928      | 0.76317294  | 0.389117048 | 0.049844734 |
| BTBD1 53339     | 0.963295117 | 0.491318117 | 0.049921706 |
| C6orf120 387263 | 0.96343119  | 0.491399036 | 0.049927071 |
| HNRNPM 4670     | 0.880324753 | 0.449151062 | 0.049998738 |

## Supplement S1 to S15

### S2. Limit Transcript-Selection with Random Re-Sampling in Training-1.

Table S2 provides a summary of results of random re-sampling to limit the selection of transcripts associated with nodal and distant metastasis. Random re-sampling in R was used to generate the 100 random subsets of Training-1 with 60 of the 75 cases. Univariate logistic regression modeling was performed using R with transcripts included as the explanatory variable. A total of 311 transcripts (GeneSymbol|ID) were identified in at least 80% of the 100 logistic regression models with a  $p < 0.05$ . The seven transcripts in the final MS7 classifier are bolded and highlighted in blue.

| <b>Table S2.</b>     |                                                                                                   |                                                                                                          |
|----------------------|---------------------------------------------------------------------------------------------------|----------------------------------------------------------------------------------------------------------|
| <b>GeneSymbol ID</b> | <b>Percent of the 100 Training-1 Models with 60 of the 75 cases with <math>p &lt; 0.05</math></b> | <b>Max P-value in the Training-1 Models that passed with <math>p</math>-value <math>&lt; 0.05</math></b> |
| C12orf60 144608      | 100                                                                                               | 0.028415817                                                                                              |
| C14orf93 60686       | 100                                                                                               | 0.021402299                                                                                              |
| C22orf43 51233       | 100                                                                                               | 0.039154845                                                                                              |
| C6orf164 63914       | 100                                                                                               | 0.026851375                                                                                              |
| C6orf70 55780        | 100                                                                                               | 0.046313669                                                                                              |
| CALB1 793            | 100                                                                                               | 0.03979270                                                                                               |
| CCDC130 81576        | 100                                                                                               | 0.040641407                                                                                              |
| CDRT4 284040         | 100                                                                                               | 0.033133363                                                                                              |
| COL28A1 340267       | 100                                                                                               | 0.04011027                                                                                               |
| CUBN 8029            | 100                                                                                               | 0.041236836                                                                                              |
| DDX24 57062          | 100                                                                                               | 0.037308095                                                                                              |
| EIF2S2 8894          | 100                                                                                               | 0.033840741                                                                                              |
| EPR1 8475            | 100                                                                                               | 0.043403939                                                                                              |
| ETF1 2107            | 100                                                                                               | 0.037956637                                                                                              |
| ETS2 2114            | 100                                                                                               | 0.038287876                                                                                              |
| FAM116B 414918       | 100                                                                                               | 0.037878831                                                                                              |
| FAM170A 340069       | 100                                                                                               | 0.007149499                                                                                              |
| FAM53A 152877        | 100                                                                                               | 0.048929526                                                                                              |
| FGFR2 2263           | 100                                                                                               | 0.023147324                                                                                              |
| GSK3B 2932           | 100                                                                                               | 0.043612411                                                                                              |
| H2AFB1 474382        | 100                                                                                               | 0.035163813                                                                                              |
| HSCB 150274          | 100                                                                                               | 0.043022595                                                                                              |
| IFT27 11020          | 100                                                                                               | 0.040213212                                                                                              |
| IMPA2 3613           | 100                                                                                               | 0.047453102                                                                                              |
| ITIH3 3699           | 100                                                                                               | 0.016785322                                                                                              |
| KIAA0196 9897        | 100                                                                                               | 0.037668608                                                                                              |
| KRTAP5-10 387273     | 100                                                                                               | 0.045224516                                                                                              |
| LOC143188 143188     | 100                                                                                               | 0.043771227                                                                                              |
| LUC7L 55692          | 100                                                                                               | 0.04062051                                                                                               |
| MAP2K1 5604          | 100                                                                                               | 0.035756349                                                                                              |
| MED14 9282           | 100                                                                                               | 0.034047191                                                                                              |
| NLRP9 338321         | 100                                                                                               | 0.02151933                                                                                               |
| PCDHGA1 56114        | 100                                                                                               | 0.008516382                                                                                              |
| PTPLAD1 51495        | 100                                                                                               | 0.036369051                                                                                              |
| <b>RSRC1 51319</b>   | <b>100</b>                                                                                        | <b>0.023256427</b>                                                                                       |
| SENP3 26168          | 100                                                                                               | 0.025170818                                                                                              |
| STX19 415117         | 100                                                                                               | 0.036759784                                                                                              |
| TMEM22 80723         | 100                                                                                               | 0.019904241                                                                                              |

## Supplement S1 to S15

|                      |           |                    |
|----------------------|-----------|--------------------|
| TRIM50 135892        | 100       | 0.048027923        |
| TRPM4 54795          | 100       | 0.031563619        |
| TXLNG 55787          | 100       | 0.027087847        |
| WDR64 128025         | 100       | 0.032023893        |
| ZFP36L2 678          | 100       | 0.029852691        |
| ZNF528 84436         | 100       | 0.040486241        |
| ZNF688 146542        | 100       | 0.03073481         |
| C12orf27 283460      | 99        | 0.03651706         |
| C1orf101 257044      | 99        | 0.048499385        |
| C1orf228 339541      | 99        | 0.046849965        |
| CDC16 8881           | 99        | 0.043765227        |
| CROCC 9696           | 99        | 0.033991423        |
| LOC728743 728743     | 99        | 0.042641143        |
| PCDHAC2 56134        | 99        | 0.032836953        |
| TTC21A 199223        | 99        | 0.045930301        |
| WFDC8 90199          | 99        | 0.046015336        |
| CCDC57 284001        | 98        | 0.038147308        |
| CPT1B 1375           | 98        | 0.047794325        |
| DACT2 168002         | 98        | 0.044549839        |
| LTB4R2 56413         | 98        | 0.04891201         |
| OR2A9P 441295        | 98        | 0.047074838        |
| RGP1 9827            | 98        | 0.040094663        |
| SMURF1 57154         | 98        | 0.049794673        |
| SPINLW1 57119        | 98        | 0.048800018        |
| TBC1D3C 414060       | 98        | 0.046536832        |
| ACAD11 84129         | 97        | 0.041203113        |
| C17orf108 201229     | 97        | 0.048747984        |
| C19orf25 148223      | 97        | 0.048113762        |
| CCDC88A 55704        | 97        | 0.043874386        |
| DLST 1743            | 97        | 0.046813234        |
| F2R 2149             | 97        | 0.044755002        |
| GFM1 85476           | 97        | 0.044359772        |
| GLTSCR2 29997        | 97        | 0.046932453        |
| LRP5L 91355          | 97        | 0.032118225        |
| LRRC27 80313         | 97        | 0.047337511        |
| LRRC42 115353        | 97        | 0.043650234        |
| NAA50 80218          | 97        | 0.04094403         |
| PAFAH1B1 5048        | 97        | 0.039408495        |
| PCDHGA3 56112        | 97        | 0.039242731        |
| PRPS1 5631           | 97        | 0.044059517        |
| PSMA7 5688           | 97        | 0.048920828        |
| QRICH1 54870         | 97        | 0.038580589        |
| WASH3P 374666        | 97        | 0.048997783        |
| YWHAB 7529           | 97        | 0.046519772        |
| C2orf81 388963       | 96        | 0.04501821         |
| MRPL13 28998         | 96        | 0.049354455        |
| PSMD8 5714           | 96        | 0.044403835        |
| TNIP2 79155          | 96        | 0.039150764        |
| <b>BDNFOS 497258</b> | <b>95</b> | <b>0.049197263</b> |
| C1orf152 767846      | 95        | 0.047047081        |
| CCDC94 55702         | 95        | 0.043685509        |
| CYP2E1 1571          | 95        | 0.049280888        |
| KLK2 3817            | 95        | 0.048470943        |
| LDLRAD2 401944       | 95        | 0.049319106        |
| MRPL49 740           | 95        | 0.047849741        |
| RNF135 84282         | 95        | 0.049936457        |
| SF3B2 10992          | 95        | 0.040441275        |
| UROS 7390            | 95        | 0.049501804        |
| VILL 50853           | 95        | 0.048705441        |



## Supplement S1 to S15

|                           |           |                    |
|---------------------------|-----------|--------------------|
| C19orf18 147685           | 94        | 0.048610544        |
| C2CD2 25966               | 94        | 0.036231619        |
| CIRBP 1153                | 94        | 0.048548141        |
| DDX21 9188                | 94        | 0.049459149        |
| DDX27 55661               | 94        | 0.048671155        |
| DNAJA3 9093               | 94        | 0.049325381        |
| FOLH1 2346                | 94        | 0.048408887        |
| IDUA 3425                 | 94        | 0.048295577        |
| IL20 50604                | 94        | 0.049949821        |
| PCMT1 5110                | 94        | 0.048914118        |
| PRIM1 5557                | 94        | 0.049812218        |
| RCE1 9986                 | 94        | 0.049731838        |
| SGCE 8910                 | 94        | 0.049900943        |
| TEKT3 64518               | 94        | 0.046496315        |
| UBQLNL 143630             | 94        | 0.049991482        |
| CDK4 1019                 | 93        | 0.047674922        |
| DHX36 170506              | 93        | 0.046568634        |
| DPM1 8813                 | 93        | 0.04908066         |
| GLOD4 51031               | 93        | 0.048741933        |
| HCG2P7 80867              | 93        | 0.045235353        |
| LIMS3-LOC440895 100271835 | 93        | 0.048453862        |
| <b>MLLT10 8028</b>        | <b>93</b> | <b>0.047834605</b> |
| MST4 51765                | 93        | 0.04835652         |
| MZF1 7593                 | 93        | 0.048207005        |
| NUP155 9631               | 93        | 0.048334746        |
| PDE9A 5152                | 93        | 0.049378082        |
| <b>PDLIM3 27295</b>       | <b>93</b> | <b>0.048764438</b> |
| PTPN18 26469              | 93        | 0.046776971        |
| SKINTL 391037             | 93        | 0.045737942        |
| SLC25A4 291               | 93        | 0.043508077        |
| SPPL2B 56928              | 93        | 0.049047456        |
| TNFSF12-TNFSF13 407977    | 93        | 0.048840254        |
| USH2A 7399                | 93        | 0.045217579        |
| WASH2P 375260             | 93        | 0.048635516        |
| WDYHV1 55093              | 93        | 0.044227712        |
| XPO5 57510                | 93        | 0.045899847        |
| ZNF140 7699               | 93        | 0.047938151        |
| C3orf26 84319             | 92        | 0.046671312        |
| FERMT2 10979              | 92        | 0.048809722        |
| HEXDC 284004              | 92        | 0.044926509        |
| HNFA 6927                 | 92        | 0.049397811        |
| HOXD13 3239               | 92        | 0.042987585        |
| HSD11B1L 374875           | 92        | 0.048795801        |
| LMF1 64788                | 92        | 0.048502219        |
| NPDC1 56654               | 92        | 0.048365428        |
| PCYOX1 51449              | 92        | 0.048735813        |
| PNP 4860                  | 92        | 0.04797088         |
| PRKDC 5591                | 92        | 0.043403441        |
| PRMT5 10419               | 92        | 0.049023636        |
| RPIL1 94137               | 92        | 0.044585874        |
| SUGT1L 283507             | 92        | 0.04986353         |
| TFRC 7037                 | 92        | 0.049394118        |
| TMED6 146456              | 92        | 0.04566104         |
| WASH5P 375690             | 92        | 0.049753161        |
| YME1L1 10730              | 92        | 0.043579625        |
| AQP2 359                  | 91        | 0.048929326        |
| ARFGEF1 10565             | 91        | 0.041863538        |
| C4orf44 345222            | 91        | 0.047829946        |
| CCDC33 80125              | 91        | 0.04487868         |

## Supplement S1 to S15

|                    |    |             |
|--------------------|----|-------------|
| CLSPN 63967        | 91 | 0.049951776 |
| COL18A1 80781      | 91 | 0.049091137 |
| FAM193A 8603       | 91 | 0.047949723 |
| FES 2242           | 91 | 0.045483038 |
| MGC42105 167359    | 91 | 0.045612844 |
| NOXA1 10811        | 91 | 0.048396479 |
| TUBB1 81027        | 91 | 0.045345612 |
| ARRDC4 91947       | 90 | 0.046010258 |
| ASB9 140462        | 90 | 0.047355008 |
| CCDC101 112869     | 90 | 0.048764217 |
| CROCC1 84809       | 90 | 0.04933711  |
| CYP21A2 1589       | 90 | 0.049781076 |
| MRPL33 9553        | 90 | 0.047314604 |
| NDUFS1 4719        | 90 | 0.049311476 |
| PLS1 5357          | 90 | 0.049429357 |
| PPT2 9374          | 90 | 0.049505249 |
| SLC22A23 63027     | 90 | 0.043156965 |
| TMEM219 124446     | 90 | 0.047422815 |
| TXNRD2 10587       | 90 | 0.049387014 |
| C4orf31 79625      | 89 | 0.049439572 |
| CYP2D6 1565        | 89 | 0.049387255 |
| EIF2B3 8891        | 89 | 0.048898243 |
| GOLGA8F 100132565  | 89 | 0.049089678 |
| PCDHGA2 56113      | 89 | 0.049434875 |
| PCOLCE2 26577      | 89 | 0.049365388 |
| PYY 5697           | 89 | 0.046103174 |
| RHBDD3 25807       | 89 | 0.049303451 |
| RPS6KA3 6197       | 89 | 0.049521673 |
| SLC5A9 200010      | 89 | 0.048158737 |
| SNRNP35 11066      | 89 | 0.047707578 |
| TAF2 6873          | 89 | 0.046196162 |
| TTC9C 283237       | 89 | 0.04716192  |
| WFDC6 140870       | 89 | 0.048335609 |
| ZNF446 55663       | 89 | 0.047969076 |
| C8orf79 57604      | 88 | 0.046432352 |
| CIRH1A 84916       | 88 | 0.046689048 |
| CYP2C8 1558        | 88 | 0.046842961 |
| EIF4A3 9775        | 88 | 0.048504241 |
| FLJ39609 100130417 | 88 | 0.048949328 |
| GIYD2 79008        | 88 | 0.049838914 |
| GPR113 165082      | 88 | 0.048505813 |
| MBTPS2 51360       | 88 | 0.049526697 |
| MED30 90390        | 88 | 0.047932865 |
| RAB5C 5878         | 88 | 0.048444644 |
| RPL13 6137         | 88 | 0.048536328 |
| SIGIRR 59307       | 88 | 0.045994211 |
| THOC4 10189        | 88 | 0.047908263 |
| VAT1 10493         | 88 | 0.049208191 |
| ZMAT2 153527       | 88 | 0.047833456 |
| ZNF582 147948      | 88 | 0.049517343 |
| APOBEC2 10930      | 87 | 0.048931104 |
| C9orf84 158401     | 87 | 0.047861663 |
| ERAP2 64167        | 87 | 0.049582516 |
| FAM114A1 92689     | 87 | 0.049824556 |
| HOXB13 10481       | 87 | 0.049346261 |
| ID1 3422           | 87 | 0.04918764  |
| KIAA1161 57462     | 87 | 0.04757246  |
| LDLR 3949          | 87 | 0.049929041 |
| MAN2A1 4124        | 87 | 0.048496679 |

## Supplement S1 to S15

|                    |           |                    |
|--------------------|-----------|--------------------|
| MMGT1 93380        | 87        | 0.047390255        |
| MTHFSD 64779       | 87        | 0.049306123        |
| NEUROD2 4761       | 87        | 0.047731603        |
| RRAGC 64121        | 87        | 0.049364072        |
| SLC35E2 728661     | 87        | 0.047458713        |
| TMX2 51075         | 87        | 0.04998282         |
| WDR61 80349        | 87        | 0.049854712        |
| ZNF10 7556         | 87        | 0.049527672        |
| <b>APOL4 80832</b> | <b>86</b> | <b>0.047591098</b> |
| ATP5B 506          | 86        | 0.045893261        |
| CHKB-CPT1B 386593  | 86        | 0.043638427        |
| F10 2159           | 86        | 0.049635196        |
| FAM111A 63901      | 86        | 0.049295129        |
| FOXD1 2297         | 86        | 0.049500301        |
| GART 2618          | 86        | 0.047578308        |
| LRRC48 83450       | 86        | 0.048049037        |
| NCRNA00167 440072  | 86        | 0.049135979        |
| NPIPL3 23117       | 86        | 0.049668343        |
| <b>TBRG1 84897</b> | <b>86</b> | <b>0.047327698</b> |
| TMEM114 283953     | 86        | 0.04843099         |
| GTPBP4 23560       | 85        | 0.046015941        |
| HAT1 8520          | 85        | 0.048538284        |
| JMJD7-PLA2G4B 8681 | 85        | 0.049825898        |
| LOC730101 730101   | 85        | 0.048185887        |
| MCM4 4173          | 85        | 0.049880177        |
| OCM 654231         | 85        | 0.044108146        |
| PDZK1 5174         | 85        | 0.049739612        |
| PDZK1P1 728939     | 85        | 0.048752096        |
| PSMD1 5707         | 85        | 0.049590753        |
| RFC1 5981          | 85        | 0.048622416        |
| SMCR5 140771       | 85        | 0.049511807        |
| STRAP 11171        | 85        | 0.043815938        |
| UBQLN1 29979       | 85        | 0.049557676        |
| WDR44 54521        | 85        | 0.048835574        |
| ADRBK2 157         | 84        | 0.048582667        |
| CCDC48 79825       | 84        | 0.048333171        |
| CECR1 51816        | 84        | 0.048695769        |
| CORO1C 23603       | 84        | 0.046070431        |
| CSNK2A1 1457       | 84        | 0.049953179        |
| MYH3 4621          | 84        | 0.048298352        |
| NMRAL1 57407       | 84        | 0.049718896        |
| PLGLB2 5342        | 84        | 0.049107826        |
| SENP2 59343        | 84        | 0.049728375        |
| USP9X 8239         | 84        | 0.048070527        |
| ZSCAN4 201516      | 84        | 0.047597529        |
| CUL2 8453          | 83        | 0.048354843        |
| DERL1 79139        | 83        | 0.049802503        |
| ELMOD3 84173       | 83        | 0.046974692        |
| GMCL1 64395        | 83        | 0.049679161        |
| HOXA13 3209        | 83        | 0.047251066        |
| RPL32P3 132241     | 83        | 0.048654235        |
| SLC22A18 5002      | 83        | 0.048600334        |
| UBP1 7342          | 83        | 0.047100225        |
| ZNF623 9831        | 83        | 0.048322198        |
| ADAM22 53616       | 82        | 0.049952445        |
| CALU 813           | 82        | 0.046955283        |
| DVL2 1856          | 82        | 0.049391202        |
| FGF1 2246          | 82        | 0.049527918        |
| GTF2E1 2960        | 82        | 0.048377925        |

## Supplement S1 to S15

|                        |           |                    |
|------------------------|-----------|--------------------|
| P4HB 5034              | 82        | 0.048474811        |
| SCD 6319               | 82        | 0.049813836        |
| TTC16 158248           | 82        | 0.048200692        |
| VKORC1L1 154807        | 82        | 0.048711092        |
| WISP1 8840             | 82        | 0.049265451        |
| ZFP2 80108             | 82        | 0.049958693        |
| <b>ZNF596 169270</b>   | <b>82</b> | <b>0.047461422</b> |
| C20orf134 170487       | 81        | 0.049815036        |
| CDK2 1017              | 81        | 0.049955221        |
| LOC390595 390595       | 81        | 0.049621409        |
| MRPL37 51253           | 81        | 0.047447651        |
| NANOG 79923            | 81        | 0.046298914        |
| P2RY11 5032            | 81        | 0.049457097        |
| RPL18 6141             | 81        | 0.049436045        |
| SCAPER 49855           | 81        | 0.049372401        |
| SFRS2B 10929           | 81        | 0.049851399        |
| UBQLN2 29978           | 81        | 0.04982079         |
| VPRBP 9730             | 81        | 0.049776182        |
| ZNF862 643641          | 81        | 0.04924443         |
| C22orf27 150291        | 80        | 0.049581422        |
| C6orf217 100131814     | 80        | 0.049057036        |
| DDX46 9879             | 80        | 0.049049463        |
| ECT2L 345930           | 80        | 0.044041086        |
| FAM193B 54540          | 80        | 0.04695361         |
| FLJ42627 645644        | 80        | 0.048917703        |
| GSTA1 2938             | 80        | 0.047762018        |
| LOC100133612 100133612 | 80        | 0.046615172        |
| LOC219347 219347       | 80        | 0.049526139        |
| LOC284900 284900       | 80        | 0.046422871        |
| MUSTN1 389125          | 80        | 0.048856233        |
| NCRNA00174 285908      | 80        | 0.049941105        |
| NR1H2 7376             | 80        | 0.04992139         |
| RPL28 6158             | 80        | 0.047128269        |
| STX18 53407            | 80        | 0.048967412        |
| TNFRSF10A 8797         | 80        | 0.04974747         |
| TNPO3 23534            | 80        | 0.049908346        |
| UCP3 7352              | 80        | 0.047684473        |

## Supplement S1 to S15

### S3. Evaluate Candidate Transcripts in Training-2.

Table S3 provides a summary of the evaluation of the candidate transcripts from Training-1 in the Training-2 Cohort using microarray based data. Univariate logistic regression modeling for metastasis was performed in R in the 64 Training-2 cases. The relationship with metastasis was assessed using univariate logistic regression modeling with individual transcripts included as the explanatory variable. There were 33 transcripts that distinguished nodal or distant metastasis from stage I disease in Training-2 with  $p < 0.05$ . These transcripts were detected using the Affymetrix Plus 2.0 probeset indicated below. The seven transcripts in the final MS7 classifier are bolded and highlighted in blue.

| <b>Table S3.</b>     |                    |                                                                           |                       |                    |
|----------------------|--------------------|---------------------------------------------------------------------------|-----------------------|--------------------|
| <b>GeneSymbol ID</b> | <b>Probeset</b>    | <b>Univariate Logistic Modeling In Training-2 (Affymetrix microarray)</b> |                       |                    |
|                      |                    | <b>Coefficient</b>                                                        | <b>Standard Error</b> | <b>P-value</b>     |
| SCD 6319             | 211708 s at        | 1.348364253                                                               | 0.436155009           | 0.001991618        |
| KLK2 3817            | 209854 s at        | 5.12179484                                                                | 1.688834903           | 0.002423454        |
| LDLR 3949            | 214170 x at        | 1.877044253                                                               | 0.660560381           | 0.004488865        |
| <b>ZNF596 169270</b> | <b>232641 at</b>   | <b>-1.123630563</b>                                                       | <b>0.422324916</b>    | <b>0.007800546</b> |
| MRPL37 51253         | 218887 at          | 2.509100598                                                               | 0.959347925           | 0.008911702        |
| <b>PDLIM3 27295</b>  | <b>209621 s at</b> | <b>1.873951228</b>                                                        | <b>0.71693134</b>     | <b>0.008952824</b> |
| PTPN18 26469         | 213521 at          | 1.428678566                                                               | 0.562959781           | 0.011155215        |
| COL18A1 80781        | 209081 s at        | -0.999425929                                                              | 0.397745913           | 0.011980283        |
| LRRC27 80313         | 228886 at          | 1.283775515                                                               | 0.511571383           | 0.012091083        |
| LUC7L 55692          | 1557066 at         | -1.05678706                                                               | 0.422277411           | 0.012328841        |
| TFRC 7037            | 237214 at          | 4.219036884                                                               | 1.707523076           | 0.013479157        |
| SLC35E2 728661       | 217122 s at        | -1.306519776                                                              | 0.534137211           | 0.014443588        |
| ZNF623 9831          | 206188 at          | -1.21157478                                                               | 0.513568375           | 0.018317816        |
| ZNF10 7556           | 229848 at          | -1.069343172                                                              | 0.453498331           | 0.018374336        |
| UROS 7390            | 203031 s at        | 1.355658541                                                               | 0.575704785           | 0.018533638        |
| <b>APOL4 80832</b>   | <b>223801 s at</b> | <b>-1.061512979</b>                                                       | <b>0.467183571</b>    | <b>0.023077216</b> |
| <b>RSRC1 51319</b>   | <b>235354 s at</b> | <b>0.84580908</b>                                                         | <b>0.373311459</b>    | <b>0.0234702</b>   |
| CCDC57 284001        | 1553248 at         | 1.031469412                                                               | 0.458255601           | 0.024394377        |
| HOXB13 10481         | 230105 at          | 0.868620843                                                               | 0.39743493            | 0.028847267        |
| ZNF140 7699          | 204523 at          | -1.602120944                                                              | 0.734665352           | 0.029201965        |
| <b>MLLT10 8028</b>   | <b>216503 s at</b> | <b>1.331562976</b>                                                        | <b>0.611733947</b>    | <b>0.029502752</b> |
| SFRS2B 10929         | 229471 s at        | -3.262596536                                                              | 1.507603087           | 0.030457047        |
| PTPLAD1 51495        | 217777 s at        | 0.773490471                                                               | 0.358247303           | 0.030842687        |
| HOXD13 3239          | 207398 at          | 2.901486206                                                               | 1.357382088           | 0.032552438        |
| CCDC88A 55704        | 1562648 at         | -3.867982115                                                              | 1.830537722           | 0.034598154        |
| <b>TBRG1 84897</b>   | <b>230681 at</b>   | <b>-0.962005274</b>                                                       | <b>0.468101902</b>    | <b>0.039867479</b> |
| TAF2 6873            | 209523 at          | -1.473791135                                                              | 0.717972467           | 0.040100459        |
| PCDHGA3 56112        | 211879 x at        | -1.637388203                                                              | 0.798806994           | 0.040384731        |
| ZFP36L2 678          | 201368 at          | -0.57804217                                                               | 0.287994277           | 0.044735743        |
| <b>BDNFOS 497258</b> | <b>239367 at</b>   | <b>-0.726161679</b>                                                       | <b>0.36283173</b>     | <b>0.045352193</b> |
| GTPBP4 23560         | 218239 s at        | 1.285567087                                                               | 0.646094714           | 0.04661846         |
| SCAPER 49855         | 215848 at          | 0.941418527                                                               | 0.473397523           | 0.046740655        |
| C8orf79 57604        | 239297 at          | -0.379856706                                                              | 0.191035154           | 0.046766077        |

## Supplement S1 to S15

### S4. Require Consistency in Candidate Transcripts in Training Cohorts.

Table S4 provides a summary of the candidate transcripts with a consistent relationship with nodal metastasis in both the Training-1 and the Training-2 Cohorts. There were 23 transcripts with concordant coefficients from univariate logistic regression modeling in Training-1 and Training-2. That is both coefficients were either negative or positive. High expression of a transcript with a negative coefficient was associated with stage I disease (no metastasis). High expression of a transcript with a positive coefficient was associated with nodal or distant metastasis. The seven transcripts in the final MS7 classifier are bolded and highlighted in blue.

| <b>Table S4.</b>     |                                                    |                                           |                    |
|----------------------|----------------------------------------------------|-------------------------------------------|--------------------|
|                      | <b>Univariate Logistic Modeling for Metastasis</b> |                                           |                    |
|                      | <b>Training-1 (RNA-sequencing)</b>                 | <b>Training-2 (Affymetrix microarray)</b> |                    |
| <b>GeneSymbol ID</b> | <b>Coefficient</b>                                 | <b>Probeset</b>                           | <b>Coefficient</b> |
| MRPL37 51253         | 1.595857579                                        | 218887_at                                 | 2.509100598        |
| GTPBP4 23560         | 1.427071368                                        | 218239_s_at                               | 1.285567087        |
| <b>MLLT10 8028</b>   | 1.2737948                                          | 216503_s_at                               | 1.331562976        |
| PTPLAD1 51495        | 1.271930639                                        | 217777_s_at                               | 0.773490471        |
| <b>RSRC1 51319</b>   | 1.076378266                                        | 235354_s_at                               | 0.84580908         |
| SCAPER 49855         | 0.940632294                                        | 215848_at                                 | 0.941418527        |
| LDLR 3949            | 0.715178001                                        | 214170_x_at                               | 1.877044253        |
| TFRC 7037            | 0.698434467                                        | 237214_at                                 | 4.219036884        |
| SCD 6319             | 0.69767617                                         | 211708_s_at                               | 1.348364253        |
| HOXD13 3239          | 0.399495199                                        | 207398_at                                 | 2.901486206        |
| <b>PDLIM3 27295</b>  | 0.383761369                                        | 209621_s_at                               | 1.873951228        |
| C8orf79 57604        | -0.387423797                                       | 239297_at                                 | -0.379856706       |
| <b>APOL4 80832</b>   | -0.465935125                                       | 223801_s_at                               | -1.061512979       |
| <b>BDNFOS 497258</b> | -0.736747975                                       | 239367_at                                 | -0.726161679       |
| COL18A1 80781        | -0.845828665                                       | 209081_s_at                               | -0.999425929       |
| ZNF10 7556           | -0.933163492                                       | 229848_at                                 | -1.069343172       |
| <b>ZNF596 169270</b> | -0.955900968                                       | 232641_at                                 | -1.123630563       |
| ZFP36L2 678          | -1.085996313                                       | 201368_at                                 | -0.57804217        |
| SFRS2B 10929         | -1.278118474                                       | 229471_s_at                               | -3.262596536       |
| ZNF140 7699          | -1.285322946                                       | 204523_at                                 | -1.602120944       |
| LUC7L 55692          | -1.285625942                                       | 1557066_at                                | -1.05678706        |
| <b>TBRG1 84897</b>   | -1.38213156                                        | 230681_at                                 | -0.962005274       |
| SLC35E2 728661       | -1.768533935                                       | 217122_s_at                               | -1.306519776       |

## Supplement S1 to S15

### **S5. Nodal and Distant Metastasis Prediction with Clinical Factors and/or Molecular Features in Training-1.**

Table S5 illustrates the accuracy for predicting nodal and distant metastasis first for the MS7 score and a select set of clinical and molecular features in the Training-1 Cohort, and then for  $MS7 \pm G3 \pm MI$  to predict metastasis in the Validation-1, Training-2 and Validation-2 Cohorts. The clinical factors under investigation in the Training-1 Cohort included age at diagnosis, grade 3 (G3) disease, and myometrial invasion (MI) categorized as  $<50\%$  vs  $\geq 50\%$ . Three aggressive molecular subtypes defined by the UCEC TCGA Research Network were evaluated in the Training-1 Cohort including copy number variant high (CNV) subtype, somatic copy number alterations (SCNA) cluster 4 subtype or the transcript-based mitotic molecular subtype. RNAseq-based transcript expression data for *ESR1*, *ARID1A*, *CTNNB1*, *KRAS*, *MKI67*, *PIK3CA* and sequencing data for mutation in TP53 or PTEN were also repurposed from the UCEC TCGA Research Network to evaluate their relationship with nodal and distant metastasis in the Training-1 Cohort.

MS7 was the best predictor of nodal and distant metastasis in the Training-1 Cohort with an AUC (95% CI) of 0.89 (0.80-0.98) as a continuous variable or 0.87 (0.97-0.96) as a categorical variable followed by 0.69 (0.59-0.80) for MI, 0.66 (0.55-0.77) for G3 disease and 0.71 (0.58-0.83) for *ESR1* transcript expression. Age at diagnosis and the other molecular features were then dropped from further consideration. Next, we compared the accuracy of companion diagnostic models that combined  $MS7 \pm G3 \pm MI$  to predict nodal and distant metastasis in the Training-1 cohort. The AUC (95% CI) was 0.89 (0.80-0.98) for both the  $MS7+G3$  combination and the model with MS7 alone and was 0.92 (0.85-0.99) for both the  $MS7+MI$  combination and the  $MS7+MI+G3$  combination. Transcript expression of *ESR1* exhibited a higher univariate AUC than

## Supplement S1 to S15

G3 or MI but did not improve the predictive accuracy when combined with MS7 (AUC 0.89, 95% CI 0.81-0.97) or when combined with MS7 and MI (AUC 0.92, 95% CI 0.86-0.99).

**Table S5.** Predicting nodal and distant metastasis in endometrioid endometrial cancers.\*

| COHORT     | Prediction Model ^                               | AUC         | 95% CI           |
|------------|--------------------------------------------------|-------------|------------------|
| Training-1 | MS7 Score                                        | <b>0.89</b> | <b>0.80-0.98</b> |
|            | Age at diagnosis                                 | 0.56        | 0.43-0.70        |
|            | G3 (yes/no)                                      | <b>0.66</b> | <b>0.55-0.77</b> |
|            | MI (yes/no)                                      | <b>0.69</b> | <b>0.59-0.80</b> |
|            | CNV High Subtype (yes/no)                        | 0.54        | 0.45-0.64        |
|            | SCNA Cluster 4 Subtype (yes/no)                  | 0.58        | 0.49-0.66        |
|            | Mitotic Subtype (yes/no)                         | <b>0.62</b> | <b>0.50-0.74</b> |
|            | <i>ESR1</i> Expression                           | <b>0.71</b> | <b>0.58-0.83</b> |
|            | <i>ARID1A</i> Expression                         | 0.55        | 0.41-0.69        |
|            | <i>CTNNB1</i> Expression                         | <b>0.65</b> | <b>0.52-0.78</b> |
|            | <i>KRAS</i> Expression                           | <b>0.65</b> | <b>0.52-0.77</b> |
|            | <i>MKI67</i> Expression                          | 0.59        | 0.46-0.73        |
|            | <i>PIK3CA</i> Expression                         | <b>0.64</b> | <b>0.51-0.78</b> |
|            | <i>TP53</i> Mutation (yes/no)                    | 0.58        | 0.46-0.70        |
|            | <i>PTEN</i> Mutation (yes/no)                    | 0.60        | 0.48-0.73        |
|            | MS7 Score + G3 (yes/no)                          | <b>0.89</b> | <b>0.80-0.98</b> |
|            | MS7 Score + MI (yes/no)                          | <b>0.92</b> | <b>0.85-0.99</b> |
|            | MS7 Score + MI (yes/no) + G3 (yes/no)            | <b>0.92</b> | <b>0.85-0.99</b> |
|            | MS7 Score + <i>ESR1</i> Expression               | <b>0.89</b> | <b>0.81-0.97</b> |
|            | <i>ESR1</i> Expression + MI (yes/no)             | <b>0.78</b> | <b>0.67-0.89</b> |
|            | MS7 Score + MI (yes/no) + <i>ESR1</i> Expression | <b>0.92</b> | <b>0.86-0.99</b> |

\* Models made up of one, two or three variables were evaluated based on their accuracy in predicting nodal and distant metastasis using area under the curve (AUC) and 95% confidence interval (CI) from a receiver operating characteristic curve. Bolding was used to highlight significant relationships with *P-value* < 0.05.

^ The MS7 score was calculated using the platform-centric algorithm presented in Methods and evaluated per unit increase in the score. Evaluations were also performed for age at diagnosis in years, grade 3 (G3) disease, ≥ 50% myometrial invasion (MI), the aggressive copy number variant (CNV) high subtype, the aggressive somatic copy number alteration (SCNA) cluster 4 subtype, the aggressive transcriptic-based mitotic subtype, RNA sequencing based transcriptic expression of estrogen receptor (*ESR1*), *ARID1A*, *CTNNB1*, *KRAS*, *MKI67* or *PIK3CA*, or mutations in *TP53* or *PTEN*. Modeling using the aggressive molecular subtypes or using molecular features other than MS7 was restricted to the Training-1 cohort. Mutations in *ARID1A*, *CTNNB1*, *KRAS*, *MKI67* and *PIK3CA* were also evaluated but none of these molecular features exhibited a significant relationship with nodal and distant metastasis in the Training-1 cohort and were not included in this table.



## Supplement S1 to S15

Data for endometrioid endometrial cancer patients with local (N=55,417) vs. distant (N=3,324) disease were then downloaded from the Surveillance, Epidemiology, and End Results (SEER) Program to determine a population-based estimate for the accuracy of grade 3 (G3) disease to predict metastatic disease relative to that seen in our Training and Validation Cohorts. The area under the curve (AUC) and the 95% confidence interval (95% CI) for G3 disease were estimated from the receiver operator characteristics (ROC) analysis as 0.686 and 0.675-0.697 in SEER suggesting that the predictive accuracy for G3 in the Training-1, Validation-1 and the Training-2 cohorts were reasonable whereas that in the Validation-2 cohort was skewed. The poor performance of G3 disease in Training-2, however, likely reflected at least in part the higher proportion of stage I with G3 disease in this cohort. The converse is also true, enhanced performance of G3 in Validation-2 likely reflect the lower proportion of stage I with G3 disease in this cohort.

Receiver operating characteristics curves were also generated for age of diagnosis, race and ethnicity in the SEER cohort of endometrioid endometrial cancer patients and compared to that provided by G3 disease. The AUC  $\pm$  standard error (SE) for age at diagnosis was  $0.532 \pm 0.005$  while that for race was  $0.520 \pm 0.005$  and ethnicity was  $0.509 \pm 0.005$  all substantially inferior to G3. Age at diagnosis, race and ethnicity were therefore not further included in our predictive modeling for nodal and distant metastasis in endometrioid endometrial cancer patients.

## Supplement S1 to S15

### S6. Odds of Nodal and Distant Metastasis based on the MS7 Classifier, Grade 3 and/or

#### Myometrial Invasion

This section provides the odds ratio and 95% confidence interval for nodal and distant metastasis using the MS7 Classifier, grade 3 (G3) disease, and/or myometrial invasion  $\geq 50\%$  (MI) in the Training-1 and Training-2 Cohorts with RNA sequencing data, and for the Training-2 and Validation-2 Cohorts with Affymetrix Microarray data (Table S12).

| <b>Table S6.</b> Odds ratio and area under the curve estimation for nodal and distant metastasis in endometrioid endometrial cancer patients using the MS7 metastasis score (based either on RNA sequencing data or Affymetrix Microarray data), grade 3 disease, and/or $\geq 50\%$ myometrial invasion.                                                                                                                                                                                                                                                                                                                                           |     |                                            |                                            |                                            |                                            |
|-----------------------------------------------------------------------------------------------------------------------------------------------------------------------------------------------------------------------------------------------------------------------------------------------------------------------------------------------------------------------------------------------------------------------------------------------------------------------------------------------------------------------------------------------------------------------------------------------------------------------------------------------------|-----|--------------------------------------------|--------------------------------------------|--------------------------------------------|--------------------------------------------|
| <b>TYPE OF</b>                                                                                                                                                                                                                                                                                                                                                                                                                                                                                                                                                                                                                                      |     | <b>RNA Sequencing Data</b>                 |                                            | <b>Affymetrix Microarray Data</b>          |                                            |
| <b>MODEL</b>                                                                                                                                                                                                                                                                                                                                                                                                                                                                                                                                                                                                                                        |     | <i>Training-1<br/>[75 Cases]</i>           | <i>Validation-1<br/>[245 Cases]</i>        | <i>Training-2<br/>[64 Cases]</i>           | <i>Validation-2<br/>[81 Cases]</i>         |
| MS7 Only                                                                                                                                                                                                                                                                                                                                                                                                                                                                                                                                                                                                                                            |     | <b>OR 2.72;</b><br>1.83-4.62, $P < 0.001$  | <b>OR 1.51;</b><br>1.18-2.00, $P = 0.002$  | <b>OR 2.72;</b><br>1.75-4.92, $P < 0.001$  | <b>OR 1.97;</b><br>1.32-3.39, $P = 0.004$  |
| G3 Only                                                                                                                                                                                                                                                                                                                                                                                                                                                                                                                                                                                                                                             |     | <b>OR 3.92;</b><br>1.47-10.93, $P = 0.007$ | <b>OR 4.44;</b><br>1.29-20.38, $P = 0.028$ | OR 1.64;<br>0.61-4.53, $P = 0.332$         | <b>OR 7.86;</b><br>2.16-33.12, $P = 0.003$ |
| MI Only                                                                                                                                                                                                                                                                                                                                                                                                                                                                                                                                                                                                                                             |     | <b>OR 6.06;</b><br>2.07-20.76, $P = 0.002$ | <b>OR 6.79;</b><br>1.90-31.5, $P = 0.006$  | <b>OR 3.69;</b><br>1.28-16.01, $P = 0.023$ | <b>OR 9.94;</b><br>2.62-49.00, $P = 0.002$ |
| MS7+G3                                                                                                                                                                                                                                                                                                                                                                                                                                                                                                                                                                                                                                              | MS7 | <b>OR 2.69;</b><br>1.79-4.62, $P < 0.001$  | <b>OR 1.43;</b><br>1.11-1.91, $P = 0.008$  | <b>OR 2.91;</b><br>1.81-5.63, $P < 0.001$  | <b>OR 1.75;</b><br>1.15-3.12, $P = 0.025$  |
|                                                                                                                                                                                                                                                                                                                                                                                                                                                                                                                                                                                                                                                     | G3  | OR 1.12;<br>0.27-4.38, $P = 0.873$         | OR 2.74;<br>0.74-13.12, $P = 0.156$        | OR 0.56;<br>0.12-2.28, $P = 0.438$         | <b>OR 4.51;</b><br>1.08-20.61, $P = 0.041$ |
| MS7+MI                                                                                                                                                                                                                                                                                                                                                                                                                                                                                                                                                                                                                                              | MS7 | <b>OR 2.85;</b><br>1.83-5.26, $P < 0.001$  | <b>OR 1.37;</b><br>1.06-1.82, $P = 0.021$  | <b>OR 2.59;</b><br>1.69-4.67, $P < 0.001$  | <b>OR 1.95;</b><br>1.23-3.57, $P = 0.013$  |
|                                                                                                                                                                                                                                                                                                                                                                                                                                                                                                                                                                                                                                                     | MI  | <b>OR 7.70;</b><br>1.59-53.48, $P = 0.020$ | <b>OR 4.81;</b><br>1.26-23.21, $P = 0.029$ | <b>OR 5.37;</b><br>1.28-26.35, $P = 0.026$ | <b>OR 7.51;</b><br>1.76-41.80, $P = 0.010$ |
| MS7+G3+MI                                                                                                                                                                                                                                                                                                                                                                                                                                                                                                                                                                                                                                           | MS7 | <b>OR 2.91;</b><br>1.84-5.43, $P < 0.001$  | <b>OR 1.32;</b><br>1.02-1.76, $P = 0.044$  | <b>OR 2.86;</b><br>1.78-5.59, $P < 0.001$  | <b>OR 1.75;</b><br>1.09-3.25, $P = 0.040$  |
|                                                                                                                                                                                                                                                                                                                                                                                                                                                                                                                                                                                                                                                     | G3  | OR 0.72;<br>0.15-3.03, $P = 0.656$         | OR 2.70;<br>0.70-13.11, $P = 0.169$        | OR 0.38;<br>0.06-1.79, $P = 0.249$         | OR 3.03;<br>0.63-15.03, $P = 0.163$        |
|                                                                                                                                                                                                                                                                                                                                                                                                                                                                                                                                                                                                                                                     | MI  | <b>OR 8.20;</b><br>1.65-58.47, $P = 0.018$ | <b>OR 7.72;</b><br>1.25-22.77, $P = 0.030$ | <b>OR 6.42;</b><br>1.46-34.30, $P = 0.018$ | <b>OR 5.92;</b><br>1.30-34.01, $P = 0.028$ |
| <p>Relationship with nodal or distant metastasis expressed as odds ratio (OR) and 95% confidence interval (CI) from logistic regression modeling using profile-likelihood method or area under the curve (AUC) and 95% CI interval from a receiver operating characteristic curve. Bolding is used to highlight significant relationships with <math>P\text{-value} &lt; 0.05</math>.</p> <p>The MS7 metastasis score was calculated using the platform-centric algorithm presented in Methods and evaluated per unit increase in the score. Grade 3 disease was abbreviated G3. Myometrial invasion <math>\geq 50\%</math> was abbreviated MI.</p> |     |                                            |                                            |                                            |                                            |

## Supplement S1 to S15

### S7. Raw Data for Evaluating Risk of Metastasis in Validation-1 and Validation-2.

Table S6 provides a summary of the data that was used to evaluate risk of metastasis using the MS7 score, grade 3 disease and/or myometrial invasion categorized as < vs  $\geq$  50%.

| Table S7. Raw Data for Evaluating Risk of Metastasis in the 245 Validation-1 Cases and the 81 Validation-2 Cases |              |                            |                 |               |           |           |
|------------------------------------------------------------------------------------------------------------------|--------------|----------------------------|-----------------|---------------|-----------|-----------|
| Cohort                                                                                                           | Sample name  | Metastasis (Stage IIIC/IV) | Grade 3 Disease | MI $\geq$ 50% | MS7 Score | MS7 Group |
| V1                                                                                                               | GYNCOE01     | No                         | No              | Yes           | -1.99991  | 1         |
| V1                                                                                                               | GYNCOE10     | No                         | No              | Yes           | -1.69131  | 1         |
| V1                                                                                                               | GYNCOE11     | No                         | No              | No            | 2.250012  | 1         |
| V1                                                                                                               | GYNCOE12     | Yes                        | Yes             | No            | -0.09079  | 1         |
| V1                                                                                                               | GYNCOE13     | Yes                        | Yes             | Yes           | 3.003566  | 1         |
| V1                                                                                                               | GYNCOE14     | No                         | No              | No            | -1.30353  | 1         |
| V1                                                                                                               | GYNCOE15     | No                         | Yes             | No            | -3.25468  | 0         |
| V1                                                                                                               | GYNCOE02     | No                         | Yes             | No            | -0.08021  | 1         |
| V1                                                                                                               | GYNCOE03     | Yes                        | No              | Yes           | -1.51882  | 1         |
| V1                                                                                                               | GYNCOE04     | No                         | No              | Yes           | -0.43465  | 1         |
| V1                                                                                                               | GYNCOE05     | No                         | No              | No            | -3.11658  | 0         |
| V1                                                                                                               | GYNCOE06     | Yes                        | No              | Yes           | -2.95746  | 0         |
| V1                                                                                                               | GYNCOE07     | Yes                        | Yes             | No            | 1.802693  | 1         |
| V1                                                                                                               | GYNCOE08     | Yes                        | No              | No            | -1.4863   | 1         |
| V1                                                                                                               | GYNCOE09     | Yes                        | Yes             | Yes           | 6.353986  | 1         |
| V1                                                                                                               | TCGA_A5_A0GB | No                         | Yes             |               | 0.034768  | 1         |
| V1                                                                                                               | TCGA_A5_A0GD | No                         | No              | No            | -8.45536  | 0         |
| V1                                                                                                               | TCGA_A5_A0GE | No                         | No              | No            | -2.15866  | 0         |
| V1                                                                                                               | TCGA_A5_A0GH | No                         | Yes             | No            | 1.924428  | 1         |
| V1                                                                                                               | TCGA_A5_A0GI | No                         | No              | No            | -4.55785  | 0         |
| V1                                                                                                               | TCGA_A5_A0GJ | No                         | No              | No            | -3.48305  | 0         |
| V1                                                                                                               | TCGA_A5_A0GM | No                         | No              | No            | -4.68892  | 0         |
| V1                                                                                                               | TCGA_A5_A0GN | No                         | No              | Yes           | -3.00377  | 0         |
| V1                                                                                                               | TCGA_A5_A0GP | No                         | No              | No            | -0.97583  | 1         |
| V1                                                                                                               | TCGA_A5_A0GQ | No                         | No              | Yes           | -7.1368   | 0         |
| V1                                                                                                               | TCGA_A5_A0GR | No                         | No              | No            | -2.02109  | 0         |
| V1                                                                                                               | TCGA_A5_A0GU | No                         | No              | No            | -6.39266  | 0         |
| V1                                                                                                               | TCGA_A5_A0GV | No                         | No              | No            | -8.70338  | 0         |
| V1                                                                                                               | TCGA_A5_A0GW | No                         | Yes             | No            | -1.45237  | 1         |
| V1                                                                                                               | TCGA_A5_A0GX | No                         | No              | No            | -1.64199  | 1         |
| V1                                                                                                               | TCGA_A5_A0R7 | No                         | No              | No            | -3.45006  | 0         |
| V1                                                                                                               | TCGA_A5_A0R8 | No                         | No              | Yes           | -3.88646  | 0         |

## Supplement S1 to S15

|    |              |    |     |     |          |   |
|----|--------------|----|-----|-----|----------|---|
| V1 | TCGA_A5_A0R9 | No | No  | No  | -3.93718 | 0 |
| V1 | TCGA_A5_A0RA | No | No  | Yes | -10.912  | 0 |
| V1 | TCGA_A5_A0VO | No | No  | Yes | -2.43665 | 0 |
| V1 | TCGA_A5_A0VP | No | Yes | No  | -2.97798 | 0 |
| V1 | TCGA_A5_A0VQ | No | Yes | No  | -4.75546 | 0 |
| V1 | TCGA_A5_A1OJ | No | No  | No  | -2.85186 | 0 |
| V1 | TCGA_A5_A2K5 | No | Yes | No  | -5.84854 | 0 |
| V1 | TCGA_A5_A3LO | No | Yes | Yes | -0.40974 | 1 |
| V1 | TCGA_AJ_A23O | No | Yes | Yes | -1.42696 | 1 |
| V1 | TCGA_AJ_A2QK | No | Yes | No  | -1.20479 | 1 |
| V1 | TCGA_AJ_A2QO | No | Yes | Yes | -1.54452 | 1 |
| V1 | TCGA_AJ_A3BH | No | Yes | Yes | 0.810693 | 1 |
| V1 | TCGA_AJ_A3BI | No | Yes | No  | -6.02388 | 0 |
| V1 | TCGA_AJ_A3BK | No | Yes | Yes | -4.73498 | 0 |
| V1 | TCGA_AJ_A3EK | No | Yes | No  | 1.985956 | 1 |
| V1 | TCGA_AJ_A3EL | No | Yes | No  | -1.68418 | 1 |
| V1 | TCGA_AJ_A3EM | No | Yes | No  | 1.288767 | 1 |
| V1 | TCGA_AJ_A3NC | No | Yes | No  | -2.91078 | 0 |
| V1 | TCGA_AJ_A3NE | No | Yes | No  | -7.72561 | 0 |
| V1 | TCGA_AJ_A5DV | No | Yes | No  | -2.71609 | 0 |
| V1 | TCGA_AJ_A5DW | No | No  | No  | -4.2173  | 0 |
| V1 | TCGA_AP_A051 | No | Yes | No  | -3.59781 | 0 |
| V1 | TCGA_AP_A053 | No | Yes | No  | -0.62866 | 1 |
| V1 | TCGA_AP_A059 | No | Yes | No  | -1.21211 | 1 |
| V1 | TCGA_AP_A05N | No | No  | No  | -0.9967  | 1 |
| V1 | TCGA_AP_A05O | No | Yes | Yes | -1.32408 | 1 |
| V1 | TCGA_AP_A05P | No | No  | No  | -2.5996  | 0 |
| V1 | TCGA_AP_A0LG | No | Yes | No  | -2.10156 | 0 |
| V1 | TCGA_AP_A0LJ | No | No  | No  | -3.70539 | 0 |
| V1 | TCGA_AP_A0LL | No | No  | No  | -5.99915 | 0 |
| V1 | TCGA_AP_A0LN | No | No  | No  | -5.32793 | 0 |
| V1 | TCGA_AP_A0LO | No | No  | No  | -3.01879 | 0 |
| V1 | TCGA_AP_A0LS | No | No  | No  | -3.70811 | 0 |
| V1 | TCGA_AP_A0LV | No | No  | No  | -2.86553 | 0 |
| V1 | TCGA_AP_A1DH | No | Yes | No  | -1.04252 | 1 |
| V1 | TCGA_AP_A1DO | No | No  | No  | -6.77194 | 0 |
| V1 | TCGA_AP_A1DP | No | No  | No  | -3.15469 | 0 |
| V1 | TCGA_AP_A1E1 | No | No  | No  | -6.76169 | 0 |
| V1 | TCGA_AP_A1E4 | No | No  | Yes | 2.015109 | 1 |

## Supplement S1 to S15

|    |              |    |     |     |          |   |
|----|--------------|----|-----|-----|----------|---|
| V1 | TCGA_B5_A0JS | No | No  | No  | -2.77454 | 0 |
| V1 | TCGA_B5_A0JU | No | No  | No  | -2.29838 | 0 |
| V1 | TCGA_B5_A0JV | No | No  | No  | 0.093947 | 1 |
| V1 | TCGA_B5_A0K0 | No | No  | No  | -3.52513 | 0 |
| V1 | TCGA_B5_A0K1 | No | No  | No  | -10.4341 | 0 |
| V1 | TCGA_B5_A0K3 | No | Yes | No  | -0.18674 | 1 |
| V1 | TCGA_B5_A0K4 | No | No  | Yes | -1.49941 | 1 |
| V1 | TCGA_B5_A0K6 | No | No  | No  | -5.26702 | 0 |
| V1 | TCGA_B5_A0K7 | No | No  | No  | -8.18689 | 0 |
| V1 | TCGA_B5_A0KB | No | Yes | Yes | -1.4714  | 1 |
| V1 | TCGA_B5_A11E | No | Yes | Yes | -0.16638 | 1 |
| V1 | TCGA_B5_A11F | No | No  | No  | -2.56054 | 0 |
| V1 | TCGA_B5_A11G | No | No  | No  | -5.33571 | 0 |
| V1 | TCGA_B5_A11J | No | No  | No  | -1.20889 | 1 |
| V1 | TCGA_B5_A11L | No | No  | Yes | 1.555711 | 1 |
| V1 | TCGA_B5_A11M | No | No  | No  | -1.95248 | 1 |
| V1 | TCGA_B5_A11N | No | No  | No  | -2.80691 | 0 |
| V1 | TCGA_B5_A11O | No | No  | No  | -2.6482  | 0 |
| V1 | TCGA_B5_A11P | No | Yes | No  | -3.3191  | 0 |
| V1 | TCGA_B5_A11S | No | No  | No  | -4.05162 | 0 |
| V1 | TCGA_B5_A11V | No | No  | No  | -3.67245 | 0 |
| V1 | TCGA_B5_A11W | No | No  | Yes | -3.32422 | 0 |
| V1 | TCGA_B5_A11Y | No | No  | Yes | -3.53357 | 0 |
| V1 | TCGA_B5_A11Z | No | No  | No  | -6.60977 | 0 |
| V1 | TCGA_B5_A1MV | No | No  | No  | -1.59285 | 1 |
| V1 | TCGA_B5_A1MW | No | Yes | No  | -1.3411  | 1 |
| V1 | TCGA_B5_A1MX | No | Yes | Yes | -2.11287 | 0 |
| V1 | TCGA_B5_A1MZ | No | No  | No  | -2.4231  | 0 |
| V1 | TCGA_B5_A3F9 | No | Yes | No  | -4.32953 | 0 |
| V1 | TCGA_B5_A3FA | No | Yes | Yes | -4.15976 | 0 |
| V1 | TCGA_B5_A3FB | No | Yes | No  | -4.47101 | 0 |
| V1 | TCGA_B5_A3FD | No | Yes | No  | -2.20035 | 0 |
| V1 | TCGA_B5_A3FH | No | Yes | No  | -1.55053 | 1 |
| V1 | TCGA_BG_A0LW | No | No  | No  | -2.55397 | 0 |
| V1 | TCGA_BG_A0LX | No | No  | Yes | 0.004069 | 1 |
| V1 | TCGA_BG_A0M0 | No | No  | No  | -8.10441 | 0 |
| V1 | TCGA_BG_A0M2 | No | No  | Yes | -2.80184 | 0 |
| V1 | TCGA_BG_A0M3 | No | No  | Yes | -4.53219 | 0 |
| V1 | TCGA_BG_A0M4 | No | Yes | No  | -1.54173 | 1 |

## Supplement S1 to S15

|    |              |    |     |     |          |   |
|----|--------------|----|-----|-----|----------|---|
| V1 | TCGA_BG_A0M8 | No | Yes | Yes | -2.56549 | 0 |
| V1 | TCGA_BG_A0M9 | No | No  | Yes | -3.676   | 0 |
| V1 | TCGA_BG_A0MA | No | Yes | Yes | -2.68757 | 0 |
| V1 | TCGA_BG_A0MC | No | No  | No  | -3.61877 | 0 |
| V1 | TCGA_BG_A0MH | No | No  | Yes | 2.397145 | 1 |
| V1 | TCGA_BG_A0MI | No | No  | No  | -4.19167 | 0 |
| V1 | TCGA_BG_A0MO | No | No  | No  | -2.72976 | 0 |
| V1 | TCGA_BG_A0MQ | No | No  | No  | -6.84013 | 0 |
| V1 | TCGA_BG_A0MT | No | No  | No  | -6.98581 | 0 |
| V1 | TCGA_BG_A0RY | No | No  | Yes | -6.99606 | 0 |
| V1 | TCGA_BG_A0VV | No | No  | Yes | -3.90228 | 0 |
| V1 | TCGA_BG_A0VW | No | No  | Yes | -5.16103 | 0 |
| V1 | TCGA_BG_A0VX | No | No  | No  | -3.68517 | 0 |
| V1 | TCGA_BG_A0W2 | No | No  | No  | -3.33433 | 0 |
| V1 | TCGA_BG_A0YU | No | No  | Yes | -5.10484 | 0 |
| V1 | TCGA_BG_A187 | No | No  | Yes | -2.82922 | 0 |
| V1 | TCGA_BG_A18A | No | No  | Yes | 0.585632 | 1 |
| V1 | TCGA_BG_A18B | No | No  | No  | -1.72855 | 1 |
| V1 | TCGA_BG_A18C | No | No  | No  | -1.82771 | 1 |
| V1 | TCGA_BG_A220 | No | Yes | No  | -4.98516 | 0 |
| V1 | TCGA_BG_A221 | No | Yes |     | 0.519427 | 1 |
| V1 | TCGA_BG_A222 | No | Yes | No  | -0.97915 | 1 |
| V1 | TCGA_BG_A2AE | No | Yes |     | -0.93293 | 1 |
| V1 | TCGA_BG_A2L7 | No | Yes | No  | -3.30823 | 0 |
| V1 | TCGA_BK_A0C9 | No | No  | No  | -0.61616 | 1 |
| V1 | TCGA_BK_A139 | No | Yes |     | 1.453986 | 1 |
| V1 | TCGA_BK_A13B | No | Yes |     | -3.02196 | 0 |
| V1 | TCGA_BK_A13C | No | No  | No  | -1.5707  | 1 |
| V1 | TCGA_BK_A4ZD | No | Yes | No  | -2.25358 | 0 |
| V1 | TCGA_BK_A56F | No | No  | Yes | -0.881   | 1 |
| V1 | TCGA_BS_A0TD | No | No  | No  | -4.16363 | 0 |
| V1 | TCGA_BS_A0U5 | No | No  | No  | -4.66379 | 0 |
| V1 | TCGA_BS_A0U7 | No | No  | Yes | -0.39354 | 1 |
| V1 | TCGA_BS_A0UA | No | No  | No  | -2.36491 | 0 |
| V1 | TCGA_BS_A0UJ | No | No  | No  | -8.30123 | 0 |
| V1 | TCGA_BS_A0UL | No | No  | No  | 1.000281 | 1 |
| V1 | TCGA_BS_A0UM | No | No  | No  | -2.81168 | 0 |
| V1 | TCGA_BS_A0V7 | No | No  | No  | -9.79918 | 0 |
| V1 | TCGA_D1_A0ZN | No | No  | No  | -1.16449 | 1 |

## Supplement S1 to S15

|    |              |    |     |     |          |   |
|----|--------------|----|-----|-----|----------|---|
| V1 | TCGA_D1_A0ZO | No | No  | No  | -0.03619 | 1 |
| V1 | TCGA_D1_A0ZQ | No | No  | Yes | 2.055545 | 1 |
| V1 | TCGA_D1_A0ZR | No | No  | No  | -4.09242 | 0 |
| V1 | TCGA_D1_A0ZS | No | Yes | No  | 3.118761 | 1 |
| V1 | TCGA_D1_A0ZU | No | No  | No  | -0.90316 | 1 |
| V1 | TCGA_D1_A0ZV | No | No  | No  | -4.15704 | 0 |
| V1 | TCGA_D1_A101 | No | No  | No  | -0.917   | 1 |
| V1 | TCGA_D1_A102 | No | No  | No  | -5.26199 | 0 |
| V1 | TCGA_D1_A103 | No | No  | No  | -0.76019 | 1 |
| V1 | TCGA_D1_A15Z | No | No  | No  | -4.68719 | 0 |
| V1 | TCGA_D1_A160 | No | No  | No  | -2.78923 | 0 |
| V1 | TCGA_D1_A161 | No | No  | Yes | -2.2873  | 0 |
| V1 | TCGA_D1_A167 | No | No  | Yes | -2.82223 | 0 |
| V1 | TCGA_D1_A16D | No | No  | Yes | -2.71114 | 0 |
| V1 | TCGA_D1_A16E | No | No  | No  | -4.29673 | 0 |
| V1 | TCGA_D1_A16F | No | No  | No  | -0.61819 | 1 |
| V1 | TCGA_D1_A16O | No | No  | No  | -2.98863 | 0 |
| V1 | TCGA_D1_A16R | No | No  | No  | -3.74809 | 0 |
| V1 | TCGA_D1_A16X | No | No  | No  | -4.18105 | 0 |
| V1 | TCGA_D1_A16Y | No | No  | No  | -2.79137 | 0 |
| V1 | TCGA_D1_A174 | No | Yes | No  | -0.89365 | 1 |
| V1 | TCGA_D1_A175 | No | Yes | Yes | -2.21332 | 0 |
| V1 | TCGA_D1_A176 | No | No  | No  | -3.95064 | 0 |
| V1 | TCGA_D1_A177 | No | No  | Yes | -1.18643 | 1 |
| V1 | TCGA_D1_A17B | No | No  | No  | -0.52702 | 1 |
| V1 | TCGA_D1_A17C | No | No  | No  | -0.35747 | 1 |
| V1 | TCGA_D1_A17D | No | Yes | Yes | -3.35997 | 0 |
| V1 | TCGA_D1_A17F | No | No  | No  | -4.46695 | 0 |
| V1 | TCGA_D1_A17H | No | No  | Yes | -2.12812 | 0 |
| V1 | TCGA_D1_A17K | No | No  | No  | -0.68156 | 1 |
| V1 | TCGA_D1_A17L | No | No  | No  | -9.73906 | 0 |
| V1 | TCGA_D1_A17N | No | No  | No  | -2.83232 | 0 |
| V1 | TCGA_D1_A17Q | No | No  | No  | -3.25261 | 0 |
| V1 | TCGA_D1_A17R | No | No  | No  | -2.75318 | 0 |
| V1 | TCGA_D1_A17S | No | No  | No  | -7.5764  | 0 |
| V1 | TCGA_D1_A17T | No | No  | No  | -8.23572 | 0 |
| V1 | TCGA_D1_A1NS | No | No  | No  | -4.64295 | 0 |
| V1 | TCGA_D1_A1NY | No | Yes | Yes | -1.18323 | 1 |
| V1 | TCGA_D1_A1NZ | No | No  | No  | -3.38689 | 0 |

# Supplement S1 to S15

|    |              |     |     |     |          |   |
|----|--------------|-----|-----|-----|----------|---|
| V1 | TCGA_D1_A1O0 | No  | Yes | No  | -2.99752 | 0 |
| V1 | TCGA_D1_A1O5 | No  | No  | No  | -3.95213 | 0 |
| V1 | TCGA_D1_A1O7 | No  | No  | No  | -1.99442 | 1 |
| V1 | TCGA_D1_A2G5 | No  | Yes | No  | -1.80681 | 1 |
| V1 | TCGA_D1_A3DH | No  | Yes | No  | -1.14067 | 1 |
| V1 | TCGA_DF_A2KN | No  | Yes | Yes | 0.575592 | 1 |
| V1 | TCGA_DF_A2KR | Yes | Yes | Yes | -1.04372 | 1 |
| V1 | TCGA_DF_A2KS | No  | Yes | No  | 1.859235 | 1 |
| V1 | TCGA_DF_A2KU | No  | Yes | No  | -5.66909 | 0 |
| V1 | TCGA_DF_A2KV | No  | Yes | No  | -7.36277 | 0 |
| V1 | TCGA_DF_A2KY | Yes | Yes | Yes | -0.58299 | 1 |
| V1 | TCGA_DF_A2KZ | No  | Yes | No  | -1.00846 | 1 |
| V1 | TCGA_DF_A2L0 | Yes | Yes | Yes | -7.13944 | 0 |
| V1 | TCGA_DI_A0WH | No  | Yes | No  | -5.39984 | 0 |
| V1 | TCGA_DI_A1C3 | No  | No  | No  | -3.43945 | 0 |
| V1 | TCGA_E6_A1LX | No  | Yes | No  | 0.882908 | 1 |
| V1 | TCGA_E6_A2P9 | No  | Yes | No  | -0.74738 | 1 |
| V1 | TCGA_EC_A1NJ | No  | No  | No  | -1.96284 | 1 |
| V1 | TCGA_EC_A1QX | No  | Yes |     | -1.27372 | 1 |
| V1 | TCGA_EO_A1Y7 | No  | Yes | Yes | -1.31768 | 1 |
| V1 | TCGA_EO_A22R | No  | Yes | Yes | 0.91137  | 1 |
| V1 | TCGA_EO_A22S | No  | Yes | Yes | 0.759266 | 1 |
| V1 | TCGA_EO_A22U | No  | Yes | Yes | 0.775061 | 1 |
| V1 | TCGA_EO_A22Y | No  | Yes | Yes | -2.54972 | 0 |
| V1 | TCGA_EO_A3AS | No  | Yes | No  | -1.76708 | 1 |
| V1 | TCGA_EO_A3AV | Yes | Yes | Yes | -0.9307  | 1 |
| V1 | TCGA_EO_A3AY | No  | Yes | Yes | -5.9897  | 0 |
| V1 | TCGA_EO_A3B0 | Yes | Yes |     | 1.396153 | 1 |
| V1 | TCGA_EO_A3KX | No  | Yes | No  | -3.32707 | 0 |
| V1 | TCGA_EO_A3L0 | No  | Yes | No  | -2.26909 | 0 |
| V1 | TCGA_EY_A1G8 | No  | Yes | No  | -5.67838 | 0 |
| V1 | TCGA_EY_A1GC | No  | Yes | No  | -2.04149 | 0 |
| V1 | TCGA_EY_A1GD | No  | No  | No  | -2.61499 | 0 |
| V1 | TCGA_EY_A1GE | No  | No  | No  | -6.66196 | 0 |
| V1 | TCGA_EY_A1GF | No  | No  | No  | -3.31335 | 0 |
| V1 | TCGA_EY_A1GH | No  | No  | No  | -4.70853 | 0 |
| V1 | TCGA_EY_A1GI | No  | No  | Yes | 0.91291  | 1 |
| V1 | TCGA_EY_A1GK | No  | Yes | Yes | 0.698147 | 1 |
| V1 | TCGA_EY_A1GP | No  | No  | No  | -0.06008 | 1 |



## Supplement S1 to S15

|    |              |     |     |     |          |   |
|----|--------------|-----|-----|-----|----------|---|
| V1 | TCGA_EY_A1GQ | No  | Yes | Yes | 0.944542 | 1 |
| V1 | TCGA_EY_A1GR | No  | Yes | No  | -0.09252 | 1 |
| V1 | TCGA_EY_A1GU | No  | No  | Yes | -3.83009 | 0 |
| V1 | TCGA_EY_A215 | No  | Yes | Yes | -3.13588 | 0 |
| V1 | TCGA_EY_A2OM | No  | Yes | No  | -3.16227 | 0 |
| V1 | TCGA_EY_A2OP | No  | Yes | No  | -0.80962 | 1 |
| V1 | TCGA_EY_A2OQ | No  | Yes | No  | -3.85787 | 0 |
| V1 | TCGA_EY_A547 | No  | Yes | No  | -1.15968 | 1 |
| V1 | TCGA_EY_A548 | No  | No  | No  | -4.63278 | 0 |
| V1 | TCGA_EY_A549 | No  | Yes | No  | -4.61489 | 0 |
| V1 | TCGA_EY_A5W2 | No  | Yes | Yes | -3.44798 | 0 |
| V1 | TCGA_FI_A2D0 | No  | Yes | No  | -3.1207  | 0 |
| V1 | TCGA_FI_A2D6 | No  | Yes | Yes | 1.570423 | 1 |
| V1 | TCGA_FI_A2F4 | No  | Yes | Yes | -6.76582 | 0 |
| V1 | TCGA_FI_A2F9 | No  | Yes | No  | 0.3813   | 1 |
| V1 | TCGA_H5_A2HR | No  | Yes | No  | -6.7738  | 0 |
| V1 | TCGA_SL_A6J9 | No  | Yes | Yes | -1.99676 | 1 |
| V1 | TCGA_SL_A6JA | No  | Yes | Yes | -10.9793 | 0 |
| V2 | V2-001       | Yes | Yes | Yes | -2.3382  | 1 |
| V2 | V2-002       | Yes | Yes | Yes | -3.79634 | 1 |
| V2 | V2-003       | No  | No  | Yes | -4.64996 | 0 |
| V2 | V2-004       | Yes | Yes | No  | -0.28308 | 1 |
| V2 | V2-005       | No  | No  | Yes | -6.4336  | 0 |
| V2 | V2-006       | No  | No  | No  | -5.11437 | 0 |
| V2 | V2-007       | No  | Yes | Yes | -3.92491 | 1 |
| V2 | V2-008       | Yes | No  | Yes | -4.79312 | 0 |
| V2 | V2-009       | No  | No  | Yes | -3.43526 | 1 |
| V2 | V2-010       | No  | Yes | No  | -4.09785 | 1 |
| V2 | V2-011       | No  | Yes | No  | -9.95483 | 0 |
| V2 | V2-012       | Yes | No  | Yes | -5.51439 | 0 |
| V2 | V2-013       | No  | No  | No  | -3.63301 | 1 |
| V2 | V2-014       | Yes | Yes | Yes | -0.51336 | 1 |
| V2 | V2-015       | No  | No  | No  | -4.33161 | 0 |
| V2 | V2-016       | No  | Yes | No  | -5.19149 | 0 |
| V2 | V2-017       | No  | No  | Yes | -5.36758 | 0 |
| V2 | V2-018       | Yes | No  | Yes | -4.15388 | 1 |
| V2 | V2-019       | No  | No  | No  | -3.91468 | 1 |
| V2 | V2-020       | No  | No  | No  | -12.3511 | 0 |
| V2 | V2-021       | No  | No  | No  | -7.58965 | 0 |

## Supplement S1 to S15

|    |        |     |     |     |          |   |
|----|--------|-----|-----|-----|----------|---|
| V2 | V2-022 | No  | No  | No  | -4.90618 | 0 |
| V2 | V2-023 | No  | No  | No  | -2.64352 | 1 |
| V2 | V2-024 | No  | No  | No  | -4.50662 | 0 |
| V2 | V2-025 | No  | Yes | Yes | -3.626   | 1 |
| V2 | V2-026 | No  | No  | No  | -10.4927 | 0 |
| V2 | V2-027 | No  | Yes | No  | -3.91705 | 1 |
| V2 | V2-028 | No  | No  | No  | -3.93342 | 1 |
| V2 | V2-029 | No  | No  | No  | -8.19999 | 0 |
| V2 | V2-030 | No  | Yes | Yes | -6.52674 | 0 |
| V2 | V2-031 | No  | No  | No  | -5.79328 | 0 |
| V2 | V2-032 | No  | No  | No  | -6.66609 | 0 |
| V2 | V2-033 | No  | No  | No  | -2.53269 | 1 |
| V2 | V2-034 | No  | No  | No  | -5.5572  | 0 |
| V2 | V2-035 | No  | No  | No  | -3.37735 | 1 |
| V2 | V2-036 | No  | No  | No  | -6.14482 | 0 |
| V2 | V2-037 | No  | Yes | Yes | -3.28338 | 1 |
| V2 | V2-038 | No  | Yes | No  | -4.16479 | 1 |
| V2 | V2-039 | No  | Yes | No  | -5.56891 | 0 |
| V2 | V2-040 | No  | No  | No  | -6.37766 | 0 |
| V2 | V2-041 | No  | Yes | Yes | -2.83556 | 1 |
| V2 | V2-042 | No  | No  | No  | -4.49953 | 0 |
| V2 | V2-043 | No  | Yes | Yes | -5.19278 | 0 |
| V2 | V2-044 | No  | No  | Yes | -5.05525 | 0 |
| V2 | V2-045 | No  | No  | No  | -5.06386 | 0 |
| V2 | V2-046 | No  | No  | No  | -7.0635  | 0 |
| V2 | V2-047 | No  | No  | No  | -6.39939 | 0 |
| V2 | V2-048 | No  | No  | No  | -4.60869 | 0 |
| V2 | V2-049 | No  | No  | No  | -3.59034 | 1 |
| V2 | V2-050 | Yes | No  | No  | -3.39768 | 1 |
| V2 | V2-051 | No  | No  | No  | -8.18358 | 0 |
| V2 | V2-052 | No  | No  | No  | -4.76607 | 0 |
| V2 | V2-053 | No  | No  | No  | -5.79173 | 0 |
| V2 | V2-054 | No  | No  | Yes | -3.72208 | 1 |
| V2 | V2-055 | No  | No  | Yes | -5.38245 | 0 |
| V2 | V2-056 | No  | No  | No  | -3.31822 | 1 |
| V2 | V2-057 | No  | No  | No  | -4.72735 | 0 |
| V2 | V2-058 | No  | No  | No  | -7.87303 | 0 |
| V2 | V2-059 | No  | No  | No  | -8.12095 | 0 |
| V2 | V2-060 | No  | No  | No  | -3.84654 | 1 |

### Supplement S1 to S15

|    |        |     |     |     |          |   |
|----|--------|-----|-----|-----|----------|---|
| V2 | V2-061 | No  | No  | No  | -3.40411 | 1 |
| V2 | V2-062 | No  | No  | No  | -4.3869  | 0 |
| V2 | V2-063 | No  | No  | No  | -5.35806 | 0 |
| V2 | V2-064 | No  | No  | No  | -7.54247 | 0 |
| V2 | V2-065 | No  | No  | No  | -8.24553 | 0 |
| V2 | V2-066 | No  | Yes | No  | -3.41936 | 1 |
| V2 | V2-067 | No  | No  | Yes | -2.68217 | 1 |
| V2 | V2-068 | No  | No  | Yes | -4.57305 | 0 |
| V2 | V2-069 | No  | No  | No  | -1.96757 | 1 |
| V2 | V2-070 | No  | No  | Yes | -4.09893 | 1 |
| V2 | V2-071 | No  | No  | No  | -9.27302 | 0 |
| V2 | V2-072 | No  | No  | No  | -3.74638 | 1 |
| V2 | V2-073 | No  | No  | No  | -8.95212 | 0 |
| V2 | V2-074 | No  | No  | No  | -7.83637 | 0 |
| V2 | V2-075 | No  | No  | No  | -7.51532 | 0 |
| V2 | V2-076 | No  | Yes | No  | -4.90483 | 0 |
| V2 | V2-077 | No  | No  | No  | -3.27616 | 1 |
| V2 | V2-078 | Yes | Yes | No  | -4.22075 | 1 |
| V2 | V2-079 | Yes | Yes | Yes | 1.284991 | 1 |
| V2 | V2-080 | Yes | Yes | Yes | -5.64037 | 0 |
| V2 | V2-081 | Yes | Yes | Yes | -3.55309 | 1 |

## Supplement S1 to S15

### S8. MS7 Classifier Correlations with Cancer Biomarker Expression.

Table S8 provides the discovery and then validation of the correlation between the MS7 classifier and transcript-based expression of cancer biomarkers using RNAseq data in the Training-1 Cohort and then in the Validation-1 Cohort, respectively.

| <b>Table S8.</b>              |                   |        |                      |        |
|-------------------------------|-------------------|--------|----------------------|--------|
|                               | Training-1 (N=75) |        | Validation-1 (N=245) |        |
| RNA-sequence based expression | <i>R</i>          | P      | <i>R</i>             | p      |
| <i>ARID1A</i>                 | 0.303             | 0.008  | 0.236                | <0.001 |
| <i>CTNNB1</i>                 | 0.396             | <0.001 | 0.246                | <0.001 |
| <i>KRAS</i>                   | 0.265             | 0.022  | 0.335                | <0.001 |
| <i>MKI67</i>                  | 0.387             | <0.001 | 0.315                | <0.001 |
| <i>PIK3CA</i>                 | 0.265             | 0.022  | 0.335                | <0.001 |
| <i>ESR1</i>                   | -0.421            | <0.001 | -0.235               | <0.001 |

Spearman's correlation coefficient (*R*).

## Supplement S1 to S15

### S9. MS7 Classifier Relationship with Mutations in Cancer Biomarkers.

Table S9.1 provides a summary of the relationship between the MS7 classifier and mutations in *ARID1A*, *CTNNB1*, *KRAS*, *PIK3CA*, *TP53* and *PTEN* in 197 TCGA cases that underwent sequencing and mutational analysis by the UCEC TCGA Research network. Table S9.2 shows the triangulated relationship between MS7 level and mutation status for CTNNB1 and TP53 in this cohort.

| <b>Table S9.1. Relationship between the MS7 classifier and mutations in TCGA.</b> |                        |                         |                             |
|-----------------------------------------------------------------------------------|------------------------|-------------------------|-----------------------------|
|                                                                                   | MS7 Low with Cases (%) | MS7 High with Cases (%) | <i>P</i> value <sup>1</sup> |
| <i>ARID1A</i> mutation                                                            |                        |                         | 0.363                       |
| No                                                                                | 80 (63.5)              | 40 (56.3)               |                             |
| Yes                                                                               | 46 (36.5)              | 31 (43.7)               |                             |
| <i>CTNNB1</i> mutation                                                            |                        |                         | <b>0.014</b>                |
| No                                                                                | 71 (56.4)              | 53 (74.7)               |                             |
| Yes                                                                               | 55 (43.7)              | 18 (25.4)               |                             |
| <i>KRAS</i> mutation                                                              |                        |                         | 0.124                       |
| No                                                                                | 99 (78.6)              | 48 (67.6)               |                             |
| Yes                                                                               | 27 (21.4)              | 23 (32.4)               |                             |
| <i>PIK3CA</i> mutation                                                            |                        |                         | 0.655                       |
| No                                                                                | 55 (43.7)              | 34 (47.9)               |                             |
| Yes                                                                               | 71 (56.4)              | 37 (52.1)               |                             |
| <i>TP53</i> mutation                                                              |                        |                         | <b>0.0009</b>               |
| No                                                                                | 117 (92.9)             | 53 (74.7)               |                             |
| Yes                                                                               | 9 (7.1)                | 18 (25.4)               |                             |
| <i>PTEN</i> mutation                                                              |                        |                         | 0.466                       |
| No                                                                                | 24 (19.1)              | 17 (23.9)               |                             |
| Yes                                                                               | 102 (81.0)             | 54 (76.1)               |                             |

1. Difference in proportion compared using Fisher's exact test.

| <b>Table S9.2. Association between MS7 Level, CTNNB1 Mutation Status and TP53 Mutation Status in TCGA</b> |               |                 |           |
|-----------------------------------------------------------------------------------------------------------|---------------|-----------------|-----------|
|                                                                                                           | TP53 Mutation | CTNNB1 Mutation |           |
|                                                                                                           |               | No              | Yes       |
| MS7 Low Patients                                                                                          | No            | 63 (88.7)       | 54 (98.2) |
|                                                                                                           | Yes           | 8 (11.3)        | 1 (1.8)   |
| MS7 High Patients                                                                                         | No            | 39 (73.6)       | 14 (77.8) |
|                                                                                                           | Yes           | 14 (26.4)       | 4 (22.2)  |
| All Patients                                                                                              | No            | 102 (82.3)      | 68 (93.2) |
|                                                                                                           | Yes           | 22 (17.7)       | 5 (6.9)   |

## Supplement S1 to S15

### S10. Evaluations for the MS7 Classifier, Molecular Subtypes and Other Molecular Features

This section shows the significant relationship observed between categorized MS7 score and the aggressive molecular subtypes as defined by the Cancer Genome Atlas (TCGA) Research Network using cases from the Uterine Corpus Endometrial Carcinoma (UCEC) project. **Table S10.1** shows the relationship in the stage I, IIIC or IV cases from TCGA in Training-1 and Validation -1 cohorts with molecular subtype data. The results from **Table S10.1** was presented in the manuscript. **Table S10.2** shows the relationship in all the endometrioid endometrial cancer cases in the TCGA UCEC project with molecular subtype data. **Table S10.3** then displays the relationship with the MS7 classifier or the SCNA Cluster 4 Subtype and nodal and distant metastasis in the stage I, IIIC, or IV cases from TCGA in Training-1 and Validation -1 cohorts with molecular subtype data. The relationship between different biomarkers evaluated by transcript expression categorized by the median or mutation status and either the MS7 classifier categorized using the optimal RNA sequencing-based transcript or with nodal and distant metastasis are displayed in **Table S10.4** for cases in Training-1 or in **Table S10.5** for cases in Validation-1 from TCGA.

| <b>Table S10.1 Association of MS7 with TCGA Molecular Subtypes in Stage I, IIIC or IV Endometrioid Endometrial Cancers in the Training-1 or Validation -1 Cohorts</b> |                        |                         |                     |                             |
|-----------------------------------------------------------------------------------------------------------------------------------------------------------------------|------------------------|-------------------------|---------------------|-----------------------------|
|                                                                                                                                                                       | MS7 Low with Cases (%) | MS7 High with Cases (%) | OR (95% C.I.)       | <i>P</i> value <sup>1</sup> |
| CNV High                                                                                                                                                              |                        |                         |                     | 0.072                       |
| No                                                                                                                                                                    | 93 (94.9)              | 49 (86.0)               |                     |                             |
| Yes                                                                                                                                                                   | 5 (5.1)                | 8 (14.0)                | 3.04 (0.94 – 9.78)  |                             |
|                                                                                                                                                                       |                        |                         |                     |                             |
| SCNA Cluster 4                                                                                                                                                        |                        |                         |                     | 0.015                       |
| No                                                                                                                                                                    | 124 (92.5)             | 83 (81.4)               |                     |                             |
| Yes                                                                                                                                                                   | 10 (7.5)               | 19 (18.6)               | 2.84 (1.26 – 6.41)  |                             |
|                                                                                                                                                                       |                        |                         |                     |                             |
| Mitotic                                                                                                                                                               |                        |                         |                     | <0.0001                     |
| No                                                                                                                                                                    | 111 (91.7)             | 52 (53.6)               |                     |                             |
| Yes                                                                                                                                                                   | 10 (8.3)               | 23 (46.4)               | 9.61 (4.49 – 20.55) |                             |

Copy number variant (CNV), somatic copy number alterations (SCNA)

1. Difference in proportion compared using Fisher's exact test.

## Supplement S1 to S15

| <b>Table S10.2. Association of MS7 with TCGA Molecular Subtypes in Stage I-IV Endometrioid Endometrial Cancer Cases</b> |                        |                         |                      |                             |
|-------------------------------------------------------------------------------------------------------------------------|------------------------|-------------------------|----------------------|-----------------------------|
|                                                                                                                         | MS7 Low with Cases (%) | MS7 High with Cases (%) | OR (95% C.I.)        | <i>P</i> value <sup>1</sup> |
| CNV High                                                                                                                |                        |                         |                      | 0.027                       |
| No                                                                                                                      | 114 (95.0)             | 56 (84.9)               |                      |                             |
| Yes                                                                                                                     | 6 (5.0)                | 10 (15.2)               | 3.39 (1.17 – 9.81)   |                             |
|                                                                                                                         |                        |                         |                      |                             |
| SCNA Cluster 4                                                                                                          |                        |                         |                      | 0.002                       |
| No                                                                                                                      | 154 (93.3)             | 105 (81.4)              |                      |                             |
| Yes                                                                                                                     | 11 (6.7)               | 24 (18.6)               | 3.20 (1.50 – 6.81)   |                             |
|                                                                                                                         |                        |                         |                      |                             |
| Mitotic                                                                                                                 |                        |                         |                      | <0.0001                     |
| No                                                                                                                      | 139 (92.7)             | 63 (52.1)               |                      |                             |
| Yes                                                                                                                     | 11 (7.3)               | 58 (47.9)               | 11.63 (5.72 – 23.66) |                             |

Copy number variant (CNV), somatic copy number alterations (SCNA)

1. Difference in proportion compared using Fisher's exact test.

| <b>Table S10.3 the relationship with the MS7 classifier or the Copy Number Variant (CNV) High Subtype and nodal and distant metastasis in the in the stage I, IIIC or IV cases from TCGA in Training-1 and Validation -1 cohorts with molecular subtype data.</b> |            |           |                |
|-------------------------------------------------------------------------------------------------------------------------------------------------------------------------------------------------------------------------------------------------------------------|------------|-----------|----------------|
|                                                                                                                                                                                                                                                                   | Metastasis |           |                |
|                                                                                                                                                                                                                                                                   | No. (%)    | No. (%)   | <i>P</i> value |
| MS7 Group                                                                                                                                                                                                                                                         |            |           | <0.0001        |
| Low                                                                                                                                                                                                                                                               | 96 (98.0)  | 2 (2.0)   |                |
| High                                                                                                                                                                                                                                                              | 38 (66.7)  | 19 (33.3) |                |
|                                                                                                                                                                                                                                                                   |            |           |                |
| TCGA Subtype                                                                                                                                                                                                                                                      |            |           | 0.387          |
| Non-CNV high                                                                                                                                                                                                                                                      | 124 (87.3) | 18 (12.7) |                |
| CNV high                                                                                                                                                                                                                                                          | 10 (76.9)  | 3 (23.1)  |                |

## Supplement S1 to S15

**Table S10.4.** The relationship between cancer biomarkers or aggressive molecular subtypes with either MS7 metastasis score based on RNA sequencing data or with nodal and distant metastasis in stage I, stage IIIC or IV endometrioid endometrial cancers from the Cancer Genome Atlas Uterine Corpus Endometrial Cancer Research Network (Training-1)

|                                | MS7 Score |      |                | Nodal or Distant Metastasis |     |                |                  |
|--------------------------------|-----------|------|----------------|-----------------------------|-----|----------------|------------------|
|                                | Low       | High | <i>P-value</i> | No                          | Yes | <i>P-value</i> | AUC (95% CI)     |
| Low MS7 Score                  | 25        | -    | -              | 23                          | 2   | <0.001         | 0.87 (0.79-0.96) |
| High MS7 Score                 | -         | 50   |                | 6                           | 44  |                |                  |
| Low <i>ESR1</i> Transcripts    | 10        | 35   | 0.023          | 12                          | 33  | 0.015          | 0.65 (0.54-0.76) |
| High <i>ESR1</i> Transcripts   | 15        | 15   |                | 17                          | 13  |                |                  |
| Low <i>ARID1A</i> Transcripts  | 18        | 25   | 0.086          | 17                          | 26  | 1.000          | 0.51 (0.39-0.63) |
| High <i>ARID1A</i> Transcripts | 7         | 25   |                | 12                          | 20  |                |                  |
| Low <i>CTNNB1</i> Transcripts  | 18        | 23   | 0.049          | 18                          | 23  | 0.348          | 0.56 (0.44-0.68) |
| High <i>CTNNB1</i> Transcripts | 7         | 27   |                | 11                          | 23  |                |                  |
| Low <i>KRAS</i> Transcripts    | 15        | 19   | 0.088          | 17                          | 17  | 0.096          | 0.61 (0.49-0.72) |
| High <i>KRAS</i> Transcripts   | 10        | 31   |                | 12                          | 29  |                |                  |
| Low <i>MKI67</i> Transcripts   | 15        | 15   | 0.023          | 15                          | 15  | 0.146          | 0.60 (0.48-0.71) |
| High <i>MKI67</i> Transcripts  | 10        | 35   |                | 14                          | 31  |                |                  |
| Low <i>PIK3CA</i> Transcripts  | 17        | 15   | 0.003          | 16                          | 16  | 0.098          | 0.60 (0.49-0.72) |
| High <i>PIK3CA</i> Transcripts | 8         | 35   |                | 13                          | 30  |                |                  |
| No <i>ARID1A</i> Mutation      | 9         | 14   | 0.523          | 8                           | 15  | 0.200          | 0.62 (0.46-0.77) |
| <i>ARID1A</i> Mutation         | 9         | 8    |                | 10                          | 7   |                |                  |
| No <i>CTNNB1</i> mutation      | 10        | 16   | 0.327          | 11                          | 15  | 0.744          | 0.54 (0.38-0.69) |
| <i>CTNNB1</i> Mutation         | 8         | 6    |                | 7                           | 7   |                |                  |
| No <i>KRAS</i> Mutation        | 14        | 14   | 0.491          | 12                          | 16  | 0.739          | 0.53 (0.38-0.68) |
| <i>KRAS</i> Mutation           | 4         | 8    |                | 6                           | 6   |                |                  |
| No <i>PIK3CA</i> Mutation      | 6         | 12   | 0.216          | 6                           | 12  | 0.216          | 0.61 (0.45-0.76) |
| <i>PIK3CA</i> Mutation         | 12        | 10   |                | 12                          | 10  |                |                  |
| No <i>TP53</i> Mutation        | 15        | 17   | 0.709          | 16                          | 16  | 0.258          | 0.58 (0.46-0.70) |
| <i>TP53</i> Mutation           | 3         | 5    |                | 2                           | 6   |                |                  |
| No <i>PTEN</i> Mutation        | 1         | 8    | 0.027          | 2                           | 7   | 0.149          | 0.60 (0.48-0.73) |
| <i>PTEN</i> Mutation           | 17        | 14   |                | 16                          | 15  |                |                  |
| Non-CNV High Subtype           | 16        | 18   | 0.613          | 16                          | 18  | 0.613          | 0.54 (0.45-0.64) |
| CNV High Subtype               | 1         | 3    |                | 1                           | 3   |                |                  |
| Non-SCNA Cluster 4 Subtype     | 22        | 33   | 0.303          | 25                          | 30  | 0.177          | 0.58 (0.49-0.66) |
| SCNA Cluster 4 Subtype         | 2         | 9    |                | 2                           | 9   |                |                  |
| Non-Mitotic Subtype            | 17        | 19   | 0.008          | 18                          | 18  | 0.071          | 0.62 (0.50-0.74) |
| Mitotic Subtype                | 4         | 23   |                | 7                           | 20  |                |                  |

MS7 score was categorized as low < -2.00356 (optimal RNA sequencing score) and high with  $\geq -2.00356$ . Transcripts categorized at the median with low < median and high as  $\geq$  median. Relationships between categorized variables were evaluated using Fisher' exact method. Relationship with metastasis was also evaluated using area of curve (AUC) with 95% confidence interval (CI) displayed from receiver operator characteristics curve for nodal and distant metastasis. Significant relationships with *P-value* <0.05 were highlighted in bold.



## Supplement S1 to S15

**Table S10.5.** Relationships between cancer biomarkers or aggressive molecular subtypes with either MS7 metastasis score based on RNA sequencing data or with metastasis in stage I, IIIC, or IV endometrioid endometrial cancers from the Cancer Genome Atlas Uterine Corpus Endometrial Cancer Research Network (Validation-1).

|                                | MS7 Score |      |                | Nodal or Distant Metastasis |     |                |                  |
|--------------------------------|-----------|------|----------------|-----------------------------|-----|----------------|------------------|
|                                | Low       | High | <i>P-value</i> | No                          | Yes | <i>P-value</i> | AUC (95% CI)     |
| Low MS7 Score                  | 142       | -    | -              | 141                         | 1   | 0.072          | 0.71 (0.51-0.91) |
| High MS7 Score                 | -         | 88   |                | 84                          | 4   |                |                  |
| Low <i>ESR1</i> Transcripts    | 55        | 53   | 0.002          | 105                         | 3   | 0.668          | 0.57 (0.32-0.81) |
| High <i>ESR1</i> Transcripts   | 87        | 35   |                | 120                         | 2   |                |                  |
| Low <i>ARID1A</i> Transcripts  | 74        | 36   | 0.105          | 106                         | 4   | 0.196          | 0.66 (0.46-0.86) |
| High <i>ARID1A</i> Transcripts | 68        | 52   |                | 119                         | 1   |                |                  |
| Low <i>CTNNB1</i> Transcripts  | 77        | 34   | 0.030          | 107                         | 4   | 0.199          | 0.66 (0.46-0.86) |
| High <i>CTNNB1</i> Transcripts | 65        | 54   |                | 118                         | 1   |                |                  |
| Low <i>KRAS</i> Transcripts    | 87        | 32   | <0.001         | 116                         | 3   | 1.000          | 0.54 (0.30-0.78) |
| High <i>KRAS</i> Transcripts   | 55        | 56   |                | 109                         | 2   |                |                  |
| Low <i>MKI67</i> Transcripts   | 91        | 32   | <0.001         | 122                         | 1   | 0.186          | 0.67 (0.47-0.87) |
| High <i>MKI67</i> Transcripts  | 51        | 56   |                | 103                         | 4   |                |                  |
| Low <i>PIK3CA</i> Transcripts  | 91        | 29   | <0.001         | 117                         | 3   | 1.000          | 0.54 (0.30-0.78) |
| High <i>PIK3CA</i> Transcripts | 51        | 59   |                | 108                         | 2   |                |                  |
| No <i>ARID1A</i> Mutation      | 55        | 20   | 0.241          | 75                          | 0   | -              | -                |
| <i>ARID1A</i> Mutation         | 31        | 18   |                | 49                          | 0   |                |                  |
| No <i>CTNNB1</i> mutation      | 51        | 28   | 0.157          | 79                          | 0   | -              | -                |
| <i>CTNNB1</i> Mutation         | 35        | 10   |                | 45                          | 0   |                |                  |
| No <i>KRAS</i> Mutation        | 67        | 25   | 0.184          | 92                          | 0   | -              | -                |
| <i>KRAS</i> Mutation           | 19        | 13   |                | 32                          | 0   |                |                  |
| No <i>PIK3CA</i> Mutation      | 40        | 18   | 1.000          | 58                          | 0   | -              | -                |
| <i>PIK3CA</i> Mutation         | 46        | 20   |                | 66                          | 0   |                |                  |
| No <i>TP53</i> Mutation        | 81        | 29   | 0.010          | 110                         | 0   | -              | -                |
| <i>TP53</i> Mutation           | 5         | 9    |                | 14                          | 0   |                |                  |
| No <i>PTEN</i> Mutation        | 18        | 7    | 0.813          | 25                          | 0   | -              | -                |
| <i>PTEN</i> Mutation           | 68        | 31   |                | 99                          | 0   |                |                  |
| Non-CNV High Subtype           | 77        | 31   | 0.131          | 108                         | 0   | -              | -                |
| CNV High Subtype               | 4         | 5    |                | 9                           | 0   |                |                  |
| Non-SCNA Cluster 4 Subtype     | 102       | 50   | 0.070          | 152                         | 0   | -              | -                |
| SCNA Cluster 4 Subtype         | 8         | 10   |                | 18                          | 0   |                |                  |
| Non-Mitotic Subtype            | 94        | 33   | <0.001         | 127                         | 0   | -              | -                |
| Mitotic Subtype                | 6         | 22   |                | 28                          | 0   |                |                  |

MS7 score was categorized as low < -2.00356 (optimal RNAseq score) and high with  $\geq -2.00356$ . Transcripts categorized as low < median or high  $\geq$  median. Relationships between categorized variables were evaluated using Fisher's exact method. Relationship with metastasis was evaluated using area of curve (AUC) with a 95% confidence interval (CI) displayed from receiver operator characteristics curve for nodal and distant metastasis. Significance set at ( $P < 0.05$  was highlighted in bold).

## Supplement S1 to S15

### S11. Differential Gene Expression in Training-1 Patients with Extreme MS7 Scores

Training-1 patients were first categorized based on MS7 score. Table S9 provides a summary of the genes that were either significantly down regulated or upregulated with a log2 ratio of gene expression less than -2 or greater than +2 in patients with an upper quartile (Q4) vs. a lower quartile (Q1) MS7 score for nodal/distant metastasis, respectively. “Curated Gene Symbol” lists TCGA gene identifiers that were hand-curated using public data sources, such as NCBI, to afford mapping of all significant differentially expressed genes in the Ingenuity Pathway Analysis (IPA) knowledgebase. “Gene symbol IPA” denotes IPA-mapped gene symbols.

| Table S11. Differential Gene Expression in Training-1 Patients with Extreme MS7 Scores |                 |                                                                                     |                                                       |             |
|----------------------------------------------------------------------------------------|-----------------|-------------------------------------------------------------------------------------|-------------------------------------------------------|-------------|
| Curated Gene Symbol                                                                    | Gene Symbol IPA | Entrez Gene Name                                                                    | Q4 versus Q1 (Log <sub>2</sub> Ratio Gene Expression) | q-value     |
| IHH                                                                                    | IHH             | indian hedgehog                                                                     | -5.118                                                | 0.006136477 |
| SCGB2A1                                                                                | SCGB2A1         | secretoglobin, family 2A, member 1                                                  | -4.627                                                | 0.005839523 |
| C4BPA                                                                                  | C4BPA           | complement component 4 binding protein, alpha                                       | -4.594                                                | 0.0128412   |
| MUC5B                                                                                  | MUC5B           | mucin 5B, oligomeric mucus/gel-forming                                              | -4.373                                                | 0.02280869  |
| HP                                                                                     | HP              | Haptoglobin                                                                         | -4.193                                                | 0.02280869  |
| MSX1                                                                                   | MSX1            | msh homeobox 1                                                                      | -4.153                                                | 0.00093901  |
| SERPINA5                                                                               | SERPINA5        | serpin peptidase inhibitor, clade A (alpha-1 antiproteinase, antitrypsin), member 5 | -3.936                                                | 0.0110201   |
| PYY                                                                                    | PYY             | peptide YY                                                                          | -3.912                                                | 0.005133647 |
| C1orf186                                                                               | C1orf186        | chromosome 1 open reading frame 186                                                 | -3.862                                                | 0.005590417 |
| VWA3A                                                                                  | VWA3A           | von Willebrand factor A domain containing 3A                                        | -3.805                                                | 0.01136266  |
| SAA1                                                                                   | SAA1            | serum amyloid A1                                                                    | -3.767                                                | 0.02941884  |
| PIGR                                                                                   | PIGR            | polymeric immunoglobulin receptor                                                   | -3.753                                                | 0.03403585  |
| HPR                                                                                    | HPR             | haptoglobin-related protein                                                         | -3.684                                                | 0.03047474  |
| DNAJB13                                                                                | DNAJB13         | DnaJ (Hsp40) homolog, subfamily B, member 13                                        | -3.656                                                | 0.007247798 |
| SERPINA4                                                                               | SERPINA4        | serpin peptidase inhibitor, clade A (alpha-1 antiproteinase, antitrypsin), member 4 | -3.655                                                | 0.02196197  |
| SAA2                                                                                   | SAA2            | serum amyloid A2                                                                    | -3.62                                                 | 0.03047474  |
| MUC13                                                                                  | MUC13           | mucin 13, cell surface associated                                                   | -3.487                                                | 0.01330222  |
| LINC00930                                                                              | LINC00930       | long intergenic non-protein coding RNA 930                                          | -3.439                                                | 0.002118548 |
| HNF1B                                                                                  | HNF1B           | HNF1 homeobox B                                                                     | -3.438                                                | 0.02538975  |
| SCGB3A1                                                                                | SCGB3A1         | secretoglobin, family 3A, member 1                                                  | -3.433                                                | 0.04138345  |
| PAX8                                                                                   | PAX8            | paired box 8                                                                        | -3.402                                                | 0.01604042  |
| CES3                                                                                   | CES3            | carboxylesterase 3                                                                  | -3.392                                                | 0.0177309   |
| KIF12                                                                                  | KIF12           | kinesin family member 12                                                            | -3.389                                                | 0.01561991  |
| GABRP                                                                                  | GABRP           | gamma-aminobutyric acid (GABA) A receptor, pi                                       | -3.378                                                | 0.01616811  |
| 100130933                                                                              | SMIM6           | small integral membrane protein 6                                                   | -3.346                                                | 0.01604042  |
| ALPPL2                                                                                 | ALPPL2          | alkaline phosphatase, placental-like 2                                              | -3.326                                                | 0.02803746  |

## Supplement S1 to S15

|                 |                         |                                                                               |        |             |
|-----------------|-------------------------|-------------------------------------------------------------------------------|--------|-------------|
| WFDC2           | WFDC2                   | WAP four-disulfide core domain 2                                              | -3.302 | 0.0110201   |
| DACT2           | DACT2                   | dishevelled-binding antagonist of beta-catenin 2                              | -3.259 | 0.003307791 |
| AMY1A           | AMY1C (includes others) | amylase, alpha 1A (salivary)                                                  | -3.215 | 0.01651241  |
| SPINLW1         | EPPIN                   | epididymal peptidase inhibitor                                                | -3.179 | 0.0106195   |
| LIMS3           | LIMS3/LIMS3L            | LIM and senescent cell antigen-like domains 3                                 | -3.161 | 0.005839523 |
| C10orf81        | PLEKHS1                 | pleckstrin homology domain containing, family S member 1                      | -3.147 | 0.03547051  |
| C1orf173        | ERICH3                  | glutamate-rich 3                                                              | -3.106 | 0.01651241  |
| CSF3            | CSF3                    | colony stimulating factor 3 (granulocyte)                                     | -3.106 | 0.02396597  |
| CCDC33          | CCDC33                  | coiled-coil domain containing 33                                              | -3.08  | 0.008275055 |
| LIMS3-LOC440895 | LIMS3-LOC440895         | LIMS3-LOC440895 readthrough                                                   | -3.076 | 0.002204647 |
| TRIM15          | TRIM15                  | tripartite motif containing 15                                                | -3.072 | 0.01962442  |
| MMP7            | MMP7                    | matrix metalloproteinase 7                                                    | -3.069 | 0.02062955  |
| ALPP            | ALPP                    | alkaline phosphatase, placental                                               | -3.057 | 0.03935181  |
| OVGP1           | OVGP1                   | oviductal glycoprotein 1, 120kDa                                              | -3.029 | 0.005839523 |
| CCL20           | CCL20                   | chemokine (C-C motif) ligand 20                                               | -3.018 | 0.01975898  |
| CLDN2           | CLDN2                   | claudin 2                                                                     | -2.927 | 0.02941884  |
| TRIM31          | TRIM31                  | tripartite motif containing 31                                                | -2.885 | 0.03738103  |
| C10orf107       | C10orf107               | chromosome 10 open reading frame 107                                          | -2.878 | 0.009361028 |
| DYNLRB2         | DYNLRB2                 | dynein, light chain, roadblock-type 2                                         | -2.858 | 0.01304076  |
| PGR             | PGR                     | progesterone receptor                                                         | -2.856 | 0.04138345  |
| PHYHD1          | PHYHD1                  | phytanoyl-CoA dioxygenase domain containing 1                                 | -2.849 | 0.006626255 |
| HGD             | HGD                     | homogentisate 1,2-dioxygenase                                                 | -2.848 | 0.04756977  |
| ESR1            | ESR1                    | estrogen receptor 1                                                           | -2.847 | 0.02280869  |
| CAPS            | CAPS                    | calcyphosine                                                                  | -2.844 | 0.007795827 |
| SLC47A1         | SLC47A1                 | solute carrier family 47 (multidrug and toxin extrusion), member 1            | -2.825 | 0.01975898  |
| PLEKHG7         | PLEKHG7                 | pleckstrin homology domain containing, family G (with RhoGef domain) member 7 | -2.805 | 0.02538975  |
| ADH6            | ADH6                    | alcohol dehydrogenase 6 (class V)                                             | -2.79  | 0.03845899  |
| POU5F1B         | POU5F1B                 | POU class 5 homeobox 1B                                                       | -2.788 | 0.005839523 |
| C2orf62         | CATIP                   | ciliogenesis associated TTC17 interacting protein                             | -2.783 | 0.01278143  |
| C6orf97         | CCDC170                 | coiled-coil domain containing 170                                             | -2.775 | 0.01210502  |
| STX19           | STX19                   | syntaxin 19                                                                   | -2.747 | 0.003759129 |
| NXF3            | NXF3                    | nuclear RNA export factor 3                                                   | -2.724 | 0.01604042  |
| CXCL3           | CXCL3                   | chemokine (C-X-C motif) ligand 3                                              | -2.706 | 0.01426048  |
| CCDC42B         | CFAP73                  | cilia and flagella associated protein 73                                      | -2.689 | 0.01651241  |
| CCDC135         | DRC7                    | dynein regulatory complex subunit 7                                           | -2.668 | 0.03935181  |
| CXCL2           | CXCL2                   | chemokine (C-X-C motif) ligand 2                                              | -2.667 | 0.01210502  |
| TMEM211         | TMEM211                 | transmembrane protein 211                                                     | -2.666 | 0.01330222  |
| FAM166B         | FAM166B                 | family with sequence similarity 166, member B                                 | -2.663 | 0.04996141  |
| CCDC108         | CCDC108                 | coiled-coil domain containing 108                                             | -2.657 | 0.02062955  |
| TTL2            | TTL2                    | tubulin tyrosine ligase-like family member 2                                  | -2.609 | 0.009972617 |
| RNF183          | RNF183                  | ring finger protein 183                                                       | -2.606 | 0.009361028 |
| TSIX            | TSIX                    | TSIX transcript, XIST antisense RNA                                           | -2.599 | 0.03047474  |
| FUT6            | FUT6                    | fucosyltransferase 6 (alpha (1,3) fucosyltransferase)                         | -2.589 | 0.02654826  |
| C1orf194        | C1orf194                | chromosome 1 open reading frame 194                                           | -2.585 | 0.04541916  |
| ARSE            | ARSE                    | arylsulfatase E (chondrodysplasia punctata 1)                                 | -2.584 | 0.02941884  |
| ACSL5           | ACSL5                   | acyl-CoA synthetase long-chain family member 5                                | -2.58  | 0.01278143  |

## Supplement S1 to S15

|                 |                 |                                                                                                               |        |             |
|-----------------|-----------------|---------------------------------------------------------------------------------------------------------------|--------|-------------|
| ASB12           | ASB12           | ankyrin repeat and SOCS box containing 12                                                                     | -2.572 | 0.005839523 |
| ST6GALNAC1      | ST6GALNAC1      | ST6 (alpha-N-acetyl-neuraminyl-2,3-beta-galactosyl-1,3)-N-acetylgalactosaminide alpha-2,6-sialyltransferase 1 | -2.57  | 0.0435928   |
| POU5F1          | POU5F1          | POU class 5 homeobox 1                                                                                        | -2.565 | 0.01210502  |
| CACNA1I         | CACNA1I         | calcium channel, voltage-dependent, T type, alpha 1I subunit                                                  | -2.55  | 0.03738103  |
| SAA4            | SAA4            | serum amyloid A4, constitutive                                                                                | -2.548 | 0.04917746  |
| UBQLNL          | UBQLNL          | ubiquilin-like                                                                                                | -2.54  | 0.004403746 |
| USH1C           | USH1C           | Usher syndrome 1C                                                                                             | -2.537 | 0.04756977  |
| CALN1           | CALN1           | calneuron 1                                                                                                   | -2.526 | 0.02538975  |
| ZMYND12         | ZMYND12         | zinc finger, MYND-type containing 12                                                                          | -2.524 | 0.005839523 |
| FOXJ1           | FOXJ1           | forkhead box J1                                                                                               | -2.516 | 0.02538975  |
| IL19            | IL19            | interleukin 19                                                                                                | -2.511 | 0.04944049  |
| LRRC50          | DNAAF1          | dynein, axonemal, assembly factor 1                                                                           | -2.507 | 0.02803746  |
| CCDC17          | CCDC17          | coiled-coil domain containing 17                                                                              | -2.493 | 0.008275055 |
| CTSE            | CTSE            | cathepsin E                                                                                                   | -2.487 | 0.02771723  |
| GGTLC2          | GGTLC2          | gamma-glutamyltransferase light chain 2                                                                       | -2.485 | 0.00882525  |
| RP1             | RP1             | retinitis pigmentosa 1 (autosomal dominant)                                                                   | -2.468 | 0.02654826  |
| COL28A1         | COL28A1         | collagen, type XXVIII, alpha 1                                                                                | -2.467 | 0.003449271 |
| DEFB4A          | DEFB4A/DEFB4B   | defensin, beta 4A                                                                                             | -2.467 | 0.03303572  |
| UBXN10          | UBXN10          | UBX domain protein 10                                                                                         | -2.452 | 0.02062955  |
| TNFSF12-TNFSF13 | TNFSF12-TNFSF13 | TNFSF12-TNFSF13 readthrough                                                                                   | -2.432 | 0.01136266  |
| TGM3            | TGM3            | transglutaminase 3                                                                                            | -2.428 | 0.03047474  |
| TP53AIP1        | TP53AIP1        | tumor protein p53 regulated apoptosis inducing protein 1                                                      | -2.405 | 0.01330222  |
| ACY3            | ACY3            | aminoacylase 3                                                                                                | -2.404 | 0.01330222  |
| C19orf33        | C19orf33        | chromosome 19 open reading frame 33                                                                           | -2.392 | 0.04996141  |
| TMED6           | TMED6           | transmembrane p24 trafficking protein 6                                                                       | -2.389 | 0.007247798 |
| TMEM101         | TMEM101         | transmembrane protein 101                                                                                     | -2.381 | 0.01210502  |
| 400891          | DLG4            | discs, large homolog 4 (Drosophila)                                                                           | -2.377 | 0.02396564  |
| SPDEF           | SPDEF           | SAM pointed domain containing ETS transcription factor                                                        | -2.376 | 0.0435928   |
| C19orf18        | C19orf18        | chromosome 19 open reading frame 18                                                                           | -2.356 | 0.008275055 |
| NME5            | NME5            | NME/NM23 family member 5                                                                                      | -2.354 | 0.01517195  |
| GLYATL1         | GLYATL1         | glycine-N-acyltransferase-like 1                                                                              | -2.323 | 0.03114439  |
| FUT3            | FUT3            | fucosyltransferase 3 (galactoside 3(4)-L-fucosyltransferase, Lewis blood group)                               | -2.32  | 0.03403585  |
| CNGA4           | CNGA4           | cyclic nucleotide gated channel alpha 4                                                                       | -2.318 | 0.02631624  |
| KLKB1           | KLKB1           | kallikrein B, plasma (Fletcher factor) 1                                                                      | -2.31  | 0.02621325  |
| TEKT3           | TEKT3           | tektin 3                                                                                                      | -2.302 | 0.002204647 |
| SRD5A2          | SRD5A2          | steroid-5-alpha-reductase, alpha polypeptide 2 (3-oxo-5 alpha-steroid delta 4-dehydrogenase alpha 2)          | -2.301 | 0.02941884  |
| AMY2A           | AMY2A           | amylase, alpha 2A (pancreatic)                                                                                | -2.297 | 0.0110201   |
| NOXA1           | NOXA1           | NADPH oxidase activator 1                                                                                     | -2.295 | 0.001248518 |
| VWA3B           | VWA3B           | von Willebrand factor A domain containing 3B                                                                  | -2.287 | 0.04258637  |
| BCL2L15         | BCL2L15         | BCL2-like 15                                                                                                  | -2.277 | 0.02396564  |
| EYA2            | EYA2            | EYA transcriptional coactivator and phosphatase 2                                                             | -2.272 | 0.03403585  |
| SIGLEC15        | SIGLEC15        | sialic acid binding Ig-like lectin 15                                                                         | -2.261 | 0.03738103  |
| C3              | NAD+            |                                                                                                               | -2.26  | 0.03240097  |
| UNC93A          | UNC93A          | unc-93 homolog A (C. elegans)                                                                                 | -2.251 | 0.02206378  |
| ASRGL1          | ASRGL1          | asparaginase like 1                                                                                           | -2.242 | 0.01210502  |
| 284276          | LINC00908       | long intergenic non-protein coding RNA 908                                                                    | -2.238 | 0.01210502  |

# Supplement S1 to S15

|            |                  |                                                                |        |             |
|------------|------------------|----------------------------------------------------------------|--------|-------------|
| STX18      | STX18            | syntaxin 18                                                    | -2.234 | 0.001608572 |
| FGFR2      | FGFR2            | fibroblast growth factor receptor 2                            | -2.229 | 0.009972617 |
| ABCA13     | ABCA13           | ATP-binding cassette, sub-family A (ABC1), member 13           | -2.227 | 0.02396564  |
| AMBP       | AMBP             | alpha-1-microglobulin/bikunin precursor                        | -2.198 | 0.04541916  |
| AMY2B      | AMY2B            | amylase, alpha 2B (pancreatic)                                 | -2.189 | 0.006249817 |
| SPATA18    | SPATA18          | spermatogenesis associated 18                                  | -2.189 | 0.01426048  |
| HNF1A      | HNF1A            | HNF1 homeobox A                                                | -2.188 | 0.01159343  |
| CCDC129    | CCDC129          | coiled-coil domain containing 129                              | -2.188 | 0.04975449  |
| DNAH6      | DNAH6            | dynein, axonemal, heavy chain 6                                | -2.181 | 0.02167748  |
| DNAH9      | DNAH9            | dynein, axonemal, heavy chain 9                                | -2.163 | 0.04756977  |
| SPATA17    | SPATA17          | spermatogenesis associated 17                                  | -2.143 | 0.01517195  |
| KIAA1324   | KIAA1324         | KIAA1324                                                       | -2.138 | 0.03047474  |
| EMX2       | EMX2             | empty spiracles homeobox 2                                     | -2.133 | 0.004001155 |
| CASC1      | CASC1            | cancer susceptibility candidate 1                              | -2.124 | 0.03047474  |
| GGTLC1     | GGTLC1           | gamma-glutamyltransferase light chain 1                        | -2.121 | 0.007247798 |
| KISS1      | KISS1            | KiSS-1 metastasis-suppressor                                   | -2.12  | 0.01874526  |
| CUBN       | CUBN             | cubilin (intrinsic factor-cobalamin receptor)                  | -2.115 | 0.001248518 |
| DLEC1      | DLEC1            | deleted in lung and esophageal cancer 1                        | -2.112 | 0.04541916  |
| CFAP221    | CFAP221          | cilia and flagella associated protein 221                      | -2.108 | 0.04996141  |
| PRSS33     | PRSS33           | protease, serine, 33                                           | -2.107 | 0.02941884  |
| LRRC46     | LRRC46           | leucine rich repeat containing 46                              | -2.104 | 0.02167748  |
| TTC18      | CFAP70           | cilia and flagella associated protein 70                       | -2.092 | 0.01330222  |
| APOL4      | APOL4            | apolipoprotein L, 4                                            | -2.087 | 0.01159343  |
| CRYBB1     | CRYBB1           | crystallin, beta B1                                            | -2.084 | 0.03738103  |
| OCA2       | OCA2             | oculocutaneous albinism II                                     | -2.084 | 0.04684127  |
| CFI        | CFI              | complement factor I                                            | -2.079 | 0.01330222  |
| TEKT4      | TEKT4            | tektin 4                                                       | -2.078 | 0.04756977  |
| CPM        | CPM              | carboxypeptidase M                                             | -2.076 | 0.02062955  |
| KLK14      | KLK14            | kallikrein-related peptidase 14                                | -2.075 | 0.03738103  |
| CYP3A5     | CYP3A5           | cytochrome P450, family 3, subfamily A, polypeptide 5          | -2.075 | 0.04756977  |
| TNNT2      | TNNT2            | troponin T type 2 (cardiac)                                    | -2.06  | 0.01517195  |
| LYPD1      | LYPD1            | LY6/PLAUR domain containing 1                                  | -2.059 | 0.03935181  |
| CD1A       | CD1A             | CD1a molecule                                                  | -2.052 | 0.01651241  |
| SLC5A9     | SLC5A9           | solute carrier family 5 (sodium/sugar cotransporter), member 9 | -2.041 | 0.008275055 |
| AGBL2      | AGBL2            | ATP/GTP binding protein-like 2                                 | -2.041 | 0.02538975  |
| GGT1       | GGT1             | gamma-glutamyltransferase 1                                    | -2.04  | 0.02654826  |
| BCO2       | BCO2             | beta-carotene oxygenase 2                                      | -2.037 | 0.006626255 |
| NCRNA00116 | LINC00116        | long intergenic non-protein coding RNA 116                     | -2.037 | 0.03935181  |
| LDLRAD2    | LDLRAD2          | low density lipoprotein receptor class A domain containing 2   | -2.035 | 0.003219602 |
| PCP2       | PCP2             | Purkinje cell protein 2                                        | -2.031 | 0.009361028 |
| C6orf41    | LINC00240        | long intergenic non-protein coding RNA 240                     | -2.027 | 0.01416221  |
| C12orf27   | HNF1A-AS1        | HNF1A antisense RNA 1                                          | -2.022 | 0.01604042  |
| RSPH10B2   | RSPH10B/RSPH10B2 | radial spoke head 10 homolog B (Chlamydomonas)                 | -2.022 | 0.02167748  |
| C10orf79   | CFAP43           | cilia and flagella associated protein 43                       | -2.021 | 0.02538975  |
| C1orf88    | PIFO             | primary cilia formation                                        | -2.02  | 0.04996141  |
| TDGF1      | TDGF1            | teratocarcinoma-derived growth factor 1                        | -2.014 | 0.0435928   |
| SEC16B     | SEC16B           | SEC16 homolog B, endoplasmic reticulum export factor           | -2.004 | 0.004035443 |

## Supplement S1 to S15

|          |               |                                                                     |        |             |
|----------|---------------|---------------------------------------------------------------------|--------|-------------|
| RAP1GAP  | RAP1GAP       | RAP1 GTPase activating protein                                      | -2.002 | 0.03547051  |
| POSTN    | POSTN         | periostin, osteoblast specific factor                               | 2.018  | 0.0110201   |
| FAM21A   | FAM21A/FAM21C | family with sequence similarity 21, member C                        | 2.107  | 0.02062955  |
| PCDHGA3  | PCDHGA3       | protocadherin gamma subfamily A, 3                                  | 2.128  | 0.01159343  |
| PCDHGA2  | PCDHGA2       | protocadherin gamma subfamily A, 2                                  | 2.147  | 0.01075619  |
| GAS1     | GAS1          | growth arrest-specific 1                                            | 2.162  | 0.01777309  |
| CBS      | CBS/CBSL      | cystathionine-beta-synthase                                         | 2.166  | 0.02538975  |
| SLC6A17  | SLC6A17       | solute carrier family 6 (neutral amino acid transporter), member 17 | 2.234  | 0.02179432  |
| MED12L   | MED12L        | mediator complex subunit 12-like                                    | 2.288  | 0.009972617 |
| PCOLCE2  | PCOLCE2       | procollagen C-endopeptidase enhancer 2                              | 2.312  | 0.03454013  |
| PTGER3   | PTGER3        | prostaglandin E receptor 3 (subtype EP3)                            | 2.37   | 0.01651241  |
| CACNA2D1 | CACNA2D1      | calcium channel, voltage-dependent, alpha 2/delta subunit 1         | 2.381  | 0.01598562  |
| FOXD1    | FOXD1         | forkhead box D1                                                     | 2.384  | 0.01962442  |
| KCNH2    | KCNH2         | potassium channel, voltage gated eag related subfamily H, member 2  | 2.485  | 0.02803746  |
| HOXA13   | HOXA13        | homeobox A13                                                        | 2.523  | 0.01651241  |
| PTGIS    | PTGIS         | prostaglandin I2 (prostacyclin) synthase                            | 2.571  | 0.01777309  |
| EIF3C    | EIF3C         | eukaryotic translation initiation factor 3, subunit C               | 2.588  | 0.0332791   |
| PDLIM3   | PDLIM3        | PDZ and LIM domain 3                                                | 2.594  | 0.005299897 |
| GPC3     | GPC3          | glypican 3                                                          | 2.649  | 0.01159343  |
| PCSK1    | PCSK1         | proprotein convertase subtilisin/kexin type 1                       | 2.72   | 0.04530378  |
| CHRD1    | CHRD1         | chordin-like 1                                                      | 2.844  | 0.02894284  |
| SIX2     | SIX2          | SIX homeobox 2                                                      | 2.896  | 0.02538975  |
| CHRD2    | CHRD2         | chordin-like 2                                                      | 2.919  | 0.01210502  |
| BIRC5    | BIRC5         | baculoviral IAP repeat containing 5                                 | 3.262  | 0.007247798 |

## Supplement S1 to S15

### S12. Enriched Pathways in Training-1 Patients with Extreme MS7 Scores

Table S12 provides a summary of the top 25 enriched molecular pathways with significant differentially expressed genes in Training-1 patients with extreme MS7 classifier scores (upper quartile [Q4] vs. lower quartile [Q1]. A  $-\log p\text{-value} \geq 2.0$ ). Z-score denotes putative pathway activation state 1. Decreased and elevated columns denote the number and percent of enriched genes decreased or elevated in the patients with a Q4 vs. Q1 MS7 score for a given pathway of interest. No overlap denotes the number and percent of canonical pathway genes not enriched in the primary dataset. Significant genes indicate specific data set enriched genes for each pathway.

| Table S12. Enriched Pathways in Training-1 Patients with Extreme MS7 Scores |                         |         |                 |                 |                  |                                                                                                                                                                                                                                                                                             |
|-----------------------------------------------------------------------------|-------------------------|---------|-----------------|-----------------|------------------|---------------------------------------------------------------------------------------------------------------------------------------------------------------------------------------------------------------------------------------------------------------------------------------------|
| Canonical Pathways                                                          | $-\log(P\text{-value})$ | z-score | Decreased       | Elevated        | No Overlap       | Significant Genes                                                                                                                                                                                                                                                                           |
| EIF2 Signaling                                                              | 9.71                    | -3.024  | 28/187<br>(15%) | 13/187<br>(7%)  | 146/187<br>(78%) | RPL11, RAF1, RPL22, PIK3CA, EIF3C, RPL39, RPLP2, PIK3R4, EIF4G1, EIF2S1, RPS4X, RPL27A, RPL13, EIF5, RPS9, RPL19, RPS2, GSK3B, RPS3, MAP2K1, RPL18, GRB2, RPL34, RPL17, RPS8, RPL29, AGO2, RPL23, RPL12, EIF2S2, RPL28, RPL9, RPS6, RPL15, RPS15, EIF4A3, RPL10, RPS25, RPL37, RPL6, RPL13A |
| Cell Cycle Control of Chromosomal Replication                               | 5.84                    | NaN     | 0/27<br>(0%)    | 11/27<br>(41%)  | 16/27<br>(59%)   | MCM3, MCM6, CDC45, MCM2, CDT1, CDK4, RPA1, MCM4, CDK2, MCM7, ORC1                                                                                                                                                                                                                           |
| Role of BRCA1 in DNA Damage Response                                        | 5.57                    | 1.732   | 0/78<br>(0%)    | 19/78<br>(24%)  | 59/78<br>(76%)   | ARID1A, TOPBP1, FANCG, BARD1, MDC1, RPA1, RFC1, PLK1, FANCE, RAD51, RFC4, FANCD2, MSH2, E2F1, MSH6, FAAP24, RFC2, BRIP1, HLTf                                                                                                                                                               |
| Mismatch Repair in Eukaryotes                                               | 4.72                    | NaN     | 0/18<br>(0%)    | 8/18<br>(44%)   | 10/18<br>(56%)   | PCNA, MSH2, RFC4, MSH6, RFC2, FEN1, RFC1, RPA1                                                                                                                                                                                                                                              |
| Hereditary Breast Cancer Signaling                                          | 4.55                    | NaN     | 2/131<br>(2%)   | 22/131<br>(17%) | 107/131<br>(82%) | PIK3CA, ARID1A, POLR2D, GADD45B, HDAC8, FANCG, BARD1, CDK4, RPA1, RFC1, PIK3R4, RAD51, FANCE, PALB2, HDAC3, FANCD2, MSH2, RFC4, XPC, E2F1, MSH6, FAAP24, RFC2, HLTf                                                                                                                         |
| Role of CHK Proteins in Cell Cycle Checkpoint Control                       | 3.86                    | 0.816   | 0/55<br>(0%)    | 13/55<br>(24%)  | 42/55<br>(76%)   | PCNA, RFC4, PPP2R2A, PPP2R5D, E2F1, RFC2, MDC1, CLSPN, PLK1, RFC1, RPA1, CDK2, CDC25A                                                                                                                                                                                                       |
| Estrogen Receptor Signaling                                                 | 3.80                    | NaN     | 7/128<br>(5%)   | 15/128<br>(12%) | 106/128<br>(83%) | MED18, MED12L, RAF1, PRKDC, POLR2D, GRB2, MED1, TBP, TAF10, GTF2A1, G6PC3, MED14, PGR, HDAC3, CDK8, TAF4, MED15, TRRAP, ERCC3, GTF2H5, MAP2K1, ESR1                                                                                                                                         |
| Estrogen-mediated S-phase Entry                                             | 3.67                    | 1.414   | 1/24<br>(4%)    | 7/24<br>(29%)   | 16/24<br>(67%)   | CCNA2, E2F1, CDK4, CDKN1B, ESR1, CDK2, SKP2, CDC25A                                                                                                                                                                                                                                         |
| IL-17A Signaling in Airway Cells                                            | 3.58                    | 1       | 8/66<br>(12%)   | 6/66<br>(9%)    | 52/66<br>(79%)   | PIK3CA, CCL20, IKBKE, IL17RA, PIK3R4, IL19, CXCL3, MAPK14, TRAF3IP2, NFKBIA, MUC5B, GSK3B, DEFB4A/DEFB4B, MAP2K1                                                                                                                                                                            |

## Supplement S1 to S15

|                                           |      |        |                |                |                  |                                                                                                                                                                                                                                                                                                |
|-------------------------------------------|------|--------|----------------|----------------|------------------|------------------------------------------------------------------------------------------------------------------------------------------------------------------------------------------------------------------------------------------------------------------------------------------------|
| Mitotic Roles of Polo-Like Kinase         | 3.58 | 0      | 2/66<br>(3%)   | 12/66<br>(18%) | 52/66<br>(79%)   | KIF23, ESPL1, PPP2R2A, PPP2R5D, PRC1, CDC23, PLK1, SMC1A, ANAPC4, HSP90AB1, FBXO5, CDC16, RAD21, CDC25A                                                                                                                                                                                        |
| Regulation of eIF4 and p70S6K Signaling   | 3.20 | 0.707  | 9/150<br>(6%)  | 14/150<br>(9%) | 127/150<br>(85%) | RAF1, EIF3C, PIK3CA, GRB2, PPP2R2A, PPP2R5D, RPS8, AGO2, PIK3R4, EIF4G1, EIF2S1, RPS4X, EIF2S2, RPS6, RPS15, MAPK14, EIF4EBP3, EIF4A3, RPS9, RPS25, RPS2, RPS3, MAP2K1                                                                                                                         |
| Protein Ubiquitination Pathway            | 2.84 | NaN    | 12/259<br>(5%) | 21/259<br>(8%) | 226/259<br>(87%) | USP14, DNAJC17, HSPA14, PSMA7, PSMB10, CDC23, DNAJC10, USP39, DNAJB13, USP13, HSP90AB1, DNAJC4, USP40, DNAJC22, BIRC3, HSPA4L, DNAJB12, PSMD13, USP9X, HSPA9, USP19, USP1, PSMD3, PSMD8, SKP2, HSPA8, ANAPC4, PSMD11, HSCB, UBE2G1, PSMD2, PSMD1, VHL                                          |
| Cyclins and Cell Cycle Regulation         | 2.81 | 0      | 1/78<br>(1%)   | 13/78<br>(17%) | 64/78<br>(82%)   | RAF1, HDAC8, PPP2R2A, PPP2R5D, CDK4, SKP2, CCNA2, HDAC3, E2F1, TGFB3, CDKN1B, GSK3B, CDK2, CDC25A                                                                                                                                                                                              |
| NRF2-mediated Oxidative Stress Response   | 2.79 | 2.309  | 10/180<br>(6%) | 15/180<br>(8%) | 155/180<br>(86%) | AKR7A2, RAF1, USP14, DNAJC17, PIK3CA, DNAJB12, PPIB, DNAJC10, JUNB, PIK3R4, DNAJB13, MAFG, GSR, FOS, MAPK14, MGST2, DNAJC4, STIP1, DNAJA3, GSK3B, FKBP5, MAP2K1, HACD3, MAP2K5, GSTK1                                                                                                          |
| BER pathway                               | 2.78 | NaN    | 0/13<br>(0%)   | 5/13<br>(38%)  | 8/13<br>(62%)    | PCNA, POLG, FEN1, OGG1, PARP1                                                                                                                                                                                                                                                                  |
| Assembly of RNA Polymerase III Complex    | 2.78 | NaN    | 1/13<br>(8%)   | 4/13<br>(31%)  | 8/13<br>(62%)    | GTF3C4, TBP, SF3A1, BRF1, POLR3D                                                                                                                                                                                                                                                               |
| Adipogenesis pathway                      | 2.68 | NaN    | 8/135<br>(6%)  | 12/135<br>(9%) | 115/135<br>(85%) | ATG7, KAT7, HDAC8, TNFRSF1A, HAT1, SAP30L, FGFR2, SAP130, SENP2, SAP30, BSCL2, FGF1, HDAC3, PAXIP1, KAT6A, AGPAT2, EZH2, ERCC3, GTF2H5, RBBP4                                                                                                                                                  |
| IL-17A Signaling in Fibroblasts           | 2.48 | NaN    | 5/35<br>(14%)  | 3/35<br>(9%)   | 27/35<br>(77%)   | FOS, MAPK14, TRAF3IP2, NFKBIA, IKBKE, GSK3B, NFKBIZ, IL17RA                                                                                                                                                                                                                                    |
| p53 Signaling                             | 2.28 | -1.667 | 2/98<br>(2%)   | 13/98<br>(13%) | 83/98<br>(85%)   | PRKDC, TP53AIP1, PIK3CA, GADD45B, MED1, TOPBP1, CDK4, PIK3R4, BIRC5, PCNA, MAPK14, E2F1, GSK3B, CTNNB1, CDK2                                                                                                                                                                                   |
| Molecular Mechanisms of Cancer            | 2.18 | NaN    | 12/373<br>(3%) | 29/373<br>(8%) | 332/373<br>(89%) | RAF1, GAB2, PIK3CA, PSENEN, ADCY4, GNA11, CDK4, BMPR1B, PIK3R4, NFKBIA, FANCD2, GNA15, PLCB1, GSK3B, CTNNB1, MAP2K1, BIRC3, CDC25A, PRKDC, STK36, GRB2, HAT1, ARHGEF15, ADCY3, PRKAR2A, AURKA, RAC3, FOS, DAXX, MAPK14, RHOA, E2F1, TGFB3, PLCB3, IHH, CDKN1B, ELK1, GNA1, CDK2, CAMK2G, PSEN1 |
| Cell Cycle: G1/S Checkpoint Regulation    | 2.18 | -1     | 2/64<br>(3%)   | 9/64<br>(14%)  | 53/64<br>(83%)   | RPL11, HDAC3, HDAC8, E2F1, CDK4, TGFB3, CDKN1B, GSK3B, CDK2, SKP2, CDC25A                                                                                                                                                                                                                      |
| Acute Phase Response Signaling            | 2.13 | 0.258  | 16/171<br>(9%) | 6/171<br>(4%)  | 149/171<br>(87%) | RAF1, SERPING1, PIK3CA, HPX, ITIH3, TNFRSF1A, GRB2, AMBP, IKBKE, SAA2, SAA4, HNF1A, FOS, KLKB1, IL18, HP, MAPK14, NFKBIA, C4BPA, SAA1, ELK1, MAP2K1                                                                                                                                            |
| Chronic Myeloid Leukemia Signaling        | 2.10 | NaN    | 2/93<br>(2%)   | 12/93<br>(13%) | 79/93<br>(85%)   | RAF1, GAB2, PIK3CA, HDAC3, HDAC8, GRB2, CRKL, E2F1, TGFB3, CDK4, IKBKE, CDKN1B, PIK3R4, MAP2K1                                                                                                                                                                                                 |
| Aldosterone Signaling in Epithelial Cells | 2.09 | 1.667  | 9/162 (6%)     | 12/162<br>(7%) | 141/162<br>(87%) | RAF1, DNAJC17, PIK3CA, DNAJB12, HSPA14, PDIA3, HSPA9, DNAJC10, PIK3R4, DNAJB13, HSPA8, HSP90AB1, DNAJC4, HSCB, PLCB3, PLCB1, DNAJC22, MAP2K1, PIP4K2C, PI4KA, HSPA4L                                                                                                                           |
| PPAR $\alpha$ /RXR $\alpha$ Activation    | 2.08 | -1.265 | 8/183<br>(4%)  | 15/183<br>(8%) | 160/183<br>(87%) | RAF1, PRKAB1, GRB2, MED1, PDIA3, CPT1B, ADCY4, ADCY3, GNA11, PRKAR2A, NCOA6, IKBKE, TGS1, CAND1, MAPK14, NFKBIA, HSP90AB1, GNA15, FASN, TGFB3, PLCB3, PLCB1, MAP2K1                                                                                                                            |



## Supplement S1 to S15

### **S13. Pathway Analyses of Differentially Expressed Transcripts in Endometrioid**

#### **Endometrial Cancer Patients Classified with High versus Low Risk of Metastasis.**

In Figure 4, data reflects the percent contribution of transcripts to enriched canonical pathways that are elevated (highlighted red) or decreased (highlighted green) in high versus low risk patients. Predicted activation states of canonical pathways are based on abundance trends of associated transcripts relative to the putative functional role of associated candidates in the pathway of interest. Pathways predicted to be activated (highlighted orange,  $z\text{-score} \geq 1.0$ ) or inhibited (highlighted blue,  $z\text{-score} \leq -1.0$ ) are further denoted. Canonical pathways are ranked by most (EIF2 Signaling) to least (PPAR $\alpha$ / RXR $\alpha$  Activation) significantly enriched. Pathway analyses was performed using Ingenuity Pathway Analysis software (Qiagen). Although an inverse relationship was observed between MS7 score and ESR1 transcript expression, functional pathway analysis suggests that estrogen signaling pathways continue to function as potential drivers in patients with metastatic disease, possibly by ligand-dependent and independent signaling mechanisms, such as via AKT-dependent regulation of ESR1. Pathways predicted to be activated in Q4 patients included regulation of DNA damage response (DDR) and steroid hormone signaling, i.e. aldosterone and estrogen-mediated S-phase entry signaling. BRCA1-associated DDR signaling was further predicted to be activated in Q4 patient tissues suggesting that patients with metastatic disease have increased homologous recombination DNA repair activities as this DDR mechanism is commonly associated with BRCA1 function. Enrichment of DNA replication and orthogonal DNA repair pathways corresponded with elevations of the cell proliferation marker MKI67 in the metastatic patients (0.982, Log2 fold-change, q-value = 0.03). Pathways predicted to be inhibited in Q4 patient tissues include p53 signaling as well as G1/S checkpoint regulation. TBRG1, a member of the MS7 risk score, has been shown to promote TP53 activation and may

## Supplement S1 to S15

lead to impaired TP53 signaling in metastatic patients. Table S8 highlights the differentially expressed genes in Q4 vs. Q1 patients with the most extreme fold changes.

### REFERENCES for SUPPLEMENT S13.

- Kramer A, Green J, Pollard J Jr, Tugendreich S. Causal analysis approaches in Ingenuity Pathway Analysis. *Bioinformatics* 2014; 30 (4):523-30.
- Vilgelm A, Lian Z, Wang H, Beuparlant SL, Klein-Szanto A, Ellenson LH, Di Cristofano A. (2006) Akt-mediated phosphorylation and activation of estrogen receptor alpha is required for endometrial neoplastic transformation in Pten<sup>+/-</sup> mice. *Cancer Res* 66, 3375-3380.
- Shah YM, Rowan BG. The Src kinase pathway promotes tamoxifen agonist action in Ishikawa endometrial cells through phosphorylation-dependent stabilization of estrogen receptor (alpha) promoter interaction and elevated steroid receptor coactivator 1 activity. *Mol Endocrinol.* 2005;19: 732-748.
- Powell SN, Kachnic LA. Roles of BRCA1 and BRCA2 in homologous recombination, DNA replication fidelity and the cellular response to ionizing radiation. *Oncogene* 2003;22(37):5784-91.
- Tompkins VS, et al. A novel nuclear interactor of ARF and MDM2 (NIAM) that maintains chromosomal stability. *J Biol Chem.* 2007;282(2):1322-33.
- Reed SM, et al. Nuclear interactor of ARF and Mdm2 regulates multiple pathways to activate p53. *Cell Cycle* 2014;13(8):1288-98.

## Supplement S1 to S15

### S14. Stage Distribution of RNA Sequencing-Based MS7 Score

Figure S14 illustrates the stage distribution of MS7 Scores in endometrioid endometrial cancer patients from the UCEC TCGA Research Network.

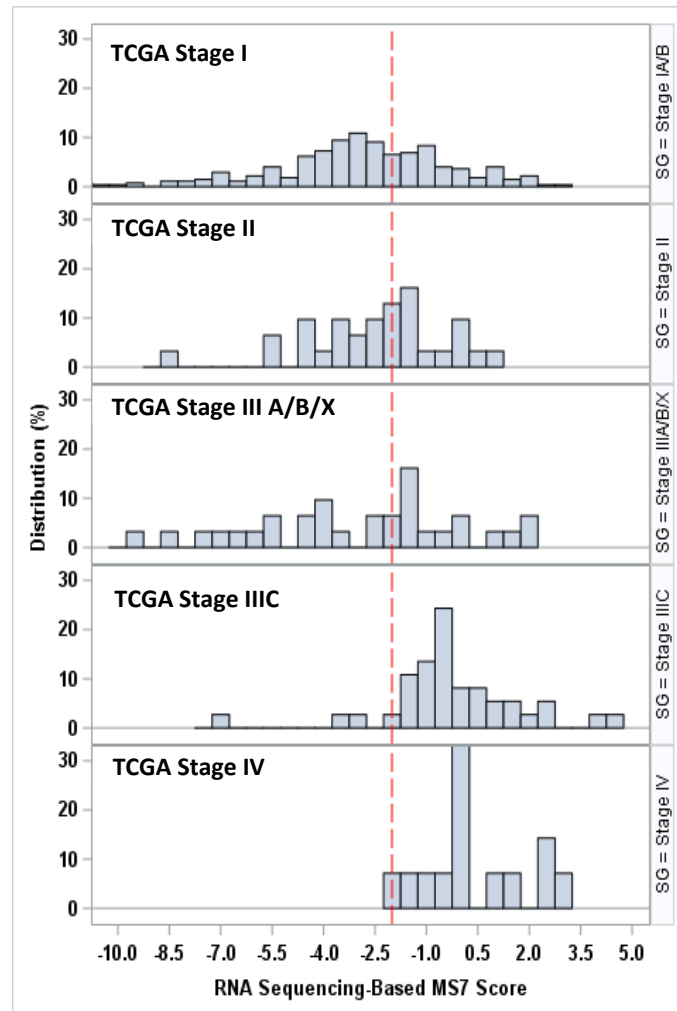

**Figure S14.** The distribution of 389 endometrioid endometrial cancer (EEC) patients from the Cancer Genome Atlas (TCGA) Uterine Corpus Endometrial Carcinoma (UCEC) Research Network by stage and MS7 score with the optimal cut-point indicated using a red dashed line.

## Supplement S1 to S15

### S15. Additional Characteristics of the Cohorts and Exploratory Evaluations of the Potential Prognostic Relevance of the MS7 Classifier

This section starts with additional characteristics for the Training and Validation Cohorts (**Table S15.1**). The relationship between high relative low RNA sequencing based MS7 score and measures of clinical outcome including progression-free survival and overall survival are displayed in **Table S15.2** using unadjusted, stage adjusted or fully adjusted Cox analyses. The fully adjusted Cox analyses included corrections for age, stage and tumor grade. Additional analyses of progression-free survival were performing using the MS7 classifier and clinical characteristics with adjuvant treatment (S15.3) or without adjuvant treatment (**Table S15.4**). **Table S15.5** compares the prediction of disease progression using the clinical variables compared with the clinical variables and the MS7 classifier. **Table S15.6** shows the relationship between different biomarkers including the MS7 classifier and progression-free survival in all the endometrioid endometrial cancer patients from the Cancer Genome Atlas (TCGA) Research Network in the Uterine Corpus Endometrial Carcinoma (UCEC) project.

| <b>Supplement S15.1</b> Treatment and outcome characteristics for the endometrioid endometrial cancer patients with stage I, IIIC or IV disease and RNA sequencing data or Affymetrix Plus 2.0 microarray data.              |                            |                     |                                   |                     |
|------------------------------------------------------------------------------------------------------------------------------------------------------------------------------------------------------------------------------|----------------------------|---------------------|-----------------------------------|---------------------|
|                                                                                                                                                                                                                              | <b>RNA Sequencing Data</b> |                     | <b>Affymetrix Microarray Data</b> |                     |
|                                                                                                                                                                                                                              | <b>Training-1</b>          | <b>Validation-1</b> | <b>Training-2</b>                 | <b>Validation-2</b> |
| Treatment                                                                                                                                                                                                                    |                            |                     |                                   |                     |
| No Adjuvant Therapy                                                                                                                                                                                                          | 28 (37.3)                  | 134 (58.3)          | -                                 | -                   |
| Endocrine Therapy                                                                                                                                                                                                            | 1 (1.3)                    | 3 (1.3)             | -                                 | -                   |
| Radiotherapy (RT)                                                                                                                                                                                                            | 9 (12.0)                   | 64 (27.8)           | -                                 | -                   |
| Chemotherapy                                                                                                                                                                                                                 | 14 (18.7)                  | 6 (2.6)             | -                                 | -                   |
| Chemotherapy and RT                                                                                                                                                                                                          | 23 (30.7)                  | 23 (10.0)           | -                                 | -                   |
| Unknown                                                                                                                                                                                                                      | -                          | 15                  | 64                                | 81                  |
| Progression within 60 months                                                                                                                                                                                                 |                            |                     |                                   |                     |
| No Progression                                                                                                                                                                                                               | 37 (59.7)                  | 179 (82.9)          | 51 (79.7)                         | -                   |
| Progression                                                                                                                                                                                                                  | 25 (40.3)                  | 37 (17.1)           | 13 (20.3)                         | -                   |
| Not Evaluable or Missing                                                                                                                                                                                                     | 13                         | 14                  |                                   | 81                  |
| Survival within 60 months                                                                                                                                                                                                    |                            |                     |                                   |                     |
| Alive                                                                                                                                                                                                                        | 60 (80.0)                  | 212 (92.2)          | 48 (75.0)                         | -                   |
| Dead                                                                                                                                                                                                                         | 15 (20.0)                  | 18 (7.80)           | 16 (25.0)                         | -                   |
| Unknown                                                                                                                                                                                                                      | -                          | 15                  | -                                 | 81                  |
| Criteria for the stage I cases in the training compared with the validation cohorts was strict for the former and loose for the later (see Methods for details). Interquartile range [IQR]. Percent provided in parentheses. |                            |                     |                                   |                     |

## Supplement S1 to S15

**Table S15.2. Relationship between High relative to Low MS7 Score and Clinical Outcomes including Progression-Free Survival and Overall Survival in Women with Stage I-IV Endometrioid Endometrial Cancer from the Cancer Genome Atlas (TCGA) Research Network Uterine Corpus Endometrial Carcinoma (UCEC) Project**

| Type of Clinical Outcome  | Type of Cox Model | Hazard Ratio (95% Confidence Interval) |
|---------------------------|-------------------|----------------------------------------|
| Progression-Free Survival | Unadjusted        | 2.51 (1.59 – 3.95)                     |
|                           | Stage Adjusted    | 1.87 (1.13 – 3.07)                     |
|                           | Fully Adjusted    | 1.89 (1.05 – 3.42)                     |
| Overall Survival          | Unadjusted        | 2.48 (1.35 – 4.56)                     |
|                           | Stage Adjusted    | 1.63 (0.83 – 3.21)                     |
|                           | Fully Adjusted    | 1.10 (0.49 – 2.46)                     |

Stage classified as: Stage I vs. Stage II vs. Stage III vs. Stage IV. Tumor grade (G) classified as: G1 vs. G2 vs. G3. Myometrial Invasion (MI) classified as 0-50% vs. ≥50%. Unadjusted hazard ratio and 95% confidence interval estimated from Cox model without control for other variables. Stage-adjusted hazard ratio and 95% confidence interval estimated from Cox model with control for stage. Fully adjusted hazard ratio and 95% confidence interval estimated from Cox model with control for age (continuous variable), stage, tumor grade and MI.

**Table S15.3 Association between Clinical Variables and MS7 with Progression-free Survival (PFS) in Endometrioid Endometrial Cases from the Cancer Genome Atlas (TCGA) Provided Adjuvant Treatment.**

|                    | Univariate Analysis |         | Multivariate Analysis |         |
|--------------------|---------------------|---------|-----------------------|---------|
|                    | HR (95% C.I.)       | P value | HR (95% C.I.)         | P value |
| Age (years)        |                     |         |                       |         |
| ≥65 vs. <65        | 1.17 (0.75 – 1.83)  | 0.479   | 1.40 (0.84 – 2.31)    | 0.195   |
| Stage              |                     |         |                       |         |
| Advanced vs. Early | 2.91 (1.86 – 4.54)  | <0.0001 | 2.11 (1.25 – 3.59)    | 0.006   |
| Tumor Grade        |                     |         |                       |         |
| High vs. Low       | 1.76 (1.12 – 2.75)  | 0.014   | 0.95 (0.55 – 1.64)    | 0.857   |
| MI                 |                     |         |                       |         |
| ≥50% vs. <50%      | 1.90 (1.17 – 3.06)  | 0.009   | 1.42 (0.87 – 2.34)    | 0.164   |
| Adjuvant Treatment |                     |         |                       |         |
| Yes vs. No         | 2.77 (1.67 – 4.60)  | <0.0001 | 1.80 (0.97 – 3.33)    | 0.062   |
| MS7                |                     |         |                       |         |
| High vs. Low       | 2.53 (1.60 – 3.99)  | <0.0001 | 1.93 (1.08 – 3.47)    | 0.027   |

## Supplement S1 to S15

**Table S15.4 Association between Clinical Variables and MS7 with Progression-free Survival (PFS) in Endometrioid Endometrial Cases from the Cancer Genome Atlas (TCGA) Not Given Adjuvant Treatment.**

|                    | Univariate Analysis |         | Multivariate Analysis |         |
|--------------------|---------------------|---------|-----------------------|---------|
|                    | HR (95% C.I.)       | P value | HR (95% C.I.)         | P value |
| Age (years)        |                     |         |                       |         |
| ≥65 vs. <65        | 1.17 (0.75 – 1.83)  | 0.479   | 1.29 (0.78 – 2.12)    | 0.317   |
| Stage              |                     |         |                       |         |
| Advanced vs. Early | 2.91 (1.86 – 4.54)  | <0.0001 | 2.50 (1.49 – 4.17)    | 0.005   |
| Tumor Grade        |                     |         |                       |         |
| High vs. Low       | 1.76 (1.12 – 2.75)  | 0.014   | 1.00 (0.58 – 1.71)    | 0.989   |
| MI                 |                     |         |                       |         |
| ≥50% vs. <50%      | 1.90 (1.17 – 3.06)  | 0.009   | 1.56 (0.85 – 2.55)    | 0.076   |
| MS7                |                     |         |                       |         |
| High vs. Low       | 2.53 (1.60 – 3.99)  | <0.0001 | 2.03 (1.13 – 3.65)    | 0.019   |

**Table S15.5 Prediction of Disease Progression based on Clinical Variables Compared to Clinical with the MS7 Classifier**

|         | Predictors                                                | Likelihood Ratio $\chi^2$ | CPE   |
|---------|-----------------------------------------------------------|---------------------------|-------|
| Model 1 | clinical variables (age + stage + tumor grade + MI)       | 27.854                    | 0.647 |
| Model 2 | clinical variables (age + stage + tumor Grade + MI) + MS7 | 33.486                    | 0.667 |

Difference in likelihood ratio  $\chi^2$  between two models:  $\Delta\chi^2 = 5.632$ ,  $p=0.018$ .

**Table S15.6 Association between ARID1A, CTNNB1, MKI67, ESR1 and MS7 with Progression-free Survival (PFS) in the Stage I-IV Endometrioid Endometrial Cases from the Cancer Genome Atlas (TCGA) including those who did and did not receive adjuvant treatment.**

|        | Univariate Analysis |         | Multivariate Analysis |         |
|--------|---------------------|---------|-----------------------|---------|
|        | HR (95% C.I.)       | P value | HR (95% C.I.)         | P value |
| ARID1A | 0.96 (0.78 – 1.20)  | 0.729   | 0.86 (0.62 – 1.19)    | 0.370   |
| CTNNB1 | 0.99 (0.80 – 1.22)  | 0.892   | 0.95 (0.74 – 1.20)    | 0.652   |
| MKI67  | 1.27 (1.01 – 1.59)  | 0.043   | 1.10 (0.86 – 1.41)    | 0.444   |
| ESR1   | 1.36 (1.13 – 1.65)  | 0.001   | 1.20 (0.97 – 1.49)    | 0.086   |
| MS7    | 1.51 (1.18 – 1.94)  | 0.001   | 1.39 (1.03 – 1.87)    | 0.029   |

HR estimated for increasing one standard deviation (SD) of ARID1A, CTNNB1, MKI67, MS7, or decreasing one SD of ESR1.
